# Supplementary material for: Artificially inserted strong promoter containing multiple G-quadruplexes induces long-range chromatin modification
Source: eLife. 2024 Aug 19;13:RP96216. doi: 10.7554/eLife.96216 (PMC11333042; doi:10.7554/eLife.96216)
Supplement: Figure 2—figure supplement 1—source data 1. [file elife-96216-fig2-figsupp1-data1.xlsx]

## Sheet: Rep1
				79 TG4 WT N						79 TG4 Mut C13
				IgG		BG4				IgG		BG4
				30.5202		30.5415				30.0027		29.1462
		R1	79 LHA Cr 100 1	30.2945	30.5535	30.9591	30.8611	0.807962		30.0723	29.8827	29.8258	29.4577	1.34257
				30.8459		31.0829				29.5731		29.4011
						32.2867				31.7457		32.1574
		R2	79 LHA Cr 200 2	32.3734	32.6484	31.8324	32.197	1.3674		31.6471	31.6964	32.2023	32.1009	0.755487
				32.9235		32.4719				32.6223		31.943
				33.7537		32.1289				33.1866		34.8863
		R3	79 RHA Cr 100 1	34.5864	34.6033	33.9827	33.0558	2.92324		35.3169	35.4985	36.1303	35.2926	1.15341
				35.47						35.6801		34.8611
				32.2203		32.4383				34.7913		34.7156
		R4	79 RHA WT 250	32.5674	32.4934	33.035	32.7755	0.82239		34.0935	34.1839	34.5559	34.5051	0.800417
				32.6924		32.8531				33.6669		34.2437

## Sheet: Rep2
		R1			R2			R3			R4
79 WT	BG4	30.2181	29.8756	2.73526	31.0665	32.7668	1.57828	27.5345	27.4274	1.73414	32.0038	31.7689	3.51578
		29.4294			34.8895			27.3304			31.5063
		29.9793			32.3443			27.4174			31.7966
	IgG	31.3697	31.3273		33.1017	33.4251		28.3249	28.2216		34.0688	33.5827
		31.9431			33.2595			28.1731			35.1611
		30.669			33.9141			28.1669			33.0967
79 Mut	BG4	31.3276	31.0362	0.664175	31.7597	33.2766	0.213261	28.0744	28.1345	1.3203	35.8173	35.2694	0.183459
		30.5918			33.7178			28.6549			34.7216
		31.189			34.3524			27.6743
	IgG	30.1941	30.4458		30.6078	31.0473		28.8292	28.5354		33.6236	32.823
		31.1322			31.3437			28.4349			32.5446
		30.011			31.1905			28.3421			32.3007

## Sheet: Compilation
				G4 array insert		Mutated G4 insert
			R1	0.807962	2.73526	1.34257	0.664175
			R2	1.3674	1.57828	0.755487	0.213261
			R3	2.92324	1.73414	1.15341	1.3203
			R4	0.82239	3.51578	0.800417	0.183459
