# Supplementary material for: Artificially inserted strong promoter containing multiple G-quadruplexes induces long-range chromatin modification
Source: eLife. 2024 Aug 19;13:RP96216. doi: 10.7554/eLife.96216 (PMC11333042; doi:10.7554/eLife.96216)
Supplement: Figure 2—source data 1. [file elife-96216-fig2-data1.xlsx]

## Sheet: A
	Rep 1										Rep 2											Rep 3
R1	79 LHA Cr 100 1										79 LHA Cr 100 1												79 TG4 WT				79 TG4 Mut
		79 TG4 WT				79 TG4 Mut						79 TG4 WT				79 TG4 Mut							27.86					27.7352
		29.1962				28.8809						28.6901					29.3675					Inp	27.45	27.6033	20.9593		Inp	28.0008	27.9499	21.3059
	Inp	29.0358	29.125	22.481		29.0545	28.8854	22.2414			Inp	28.5862	28.7388	22.0948		Inp	29.2604	29.627	22.983				27.5					28.1137
		29.1428				28.721						28.94					30.253						27.8912					28.1524
		29.854				29.1033						29.0867					29.063					H3	27.8831	27.9327	0.795804		H3	28.0537	28.0627	0.924701
	H3	29.6191	29.7967	0.627695		28.8672	29.0552	0.888919			H3	29.3032	29.195	0.728811		H3	28.8248	28.9439	1.60539				28.0238					27.9819
		29.9169				29.195						30.8565					30.4545						27.0894					28.2161
		29.0816				29.3956						28.9003					28.9937					H3K4Me1	27.2473	27.2068	1.31617	1.65389	H3K4Me1	28.0582	28.1637	0.862137	0.932341
	H3K4Me1	29.3436	29.2653	0.907208	1.4453	28.8575	29.1115	0.85491	0.961741		H3K4Me1	28.7136	28.8069	0.95374	1.30863	H3K4Me1	29.161	29.0774	1.46353	0.911636			27.2839					28.217
		29.3707				29.0813						33.3371					30.177					79 LHA Cr 200 2
																							79 TG4 WT				79 TG4 Mut
R2	79 LHA Cr 200 2										79 LHA Cr 200 2												30.99					29.9469
		79 TG4 WT				79 TG4 Mut						79 TG4 WT				79 TG4 Mut						Inp	30.35	30.6333	23.9893		Inp	29.7029	29.9447	23.3007
		30.117				29.831						30.511					32.0545						30.56					30.1842
	Inp	29.9191	29.9909	23.3469		29.4056	29.6231	22.9791			Inp	30.3585	30.4348	23.7908		Inp	31.005	31.3388	24.6948				30.2739					30.0153
		29.9365				29.6327						32.101					30.9568					H3	29.4756	29.7168	1.88741		H3	30.0705	30.2553	0.806189
		30.7633				29.3941						31.5797					30.5449						29.4009					30.6801
	H3	31.2995	31.1364	0.451972		29.1287	29.2139	1.32787			H3	32.1782	31.8789	0.367464		H3	30.6062	30.5898	1.68042				28.4644					30.344
		31.3463				29.1189						33.4314					30.6183					H3K4Me1	28.5155	28.5059	4.36892	2.31477	H3K4Me1	29.6226	29.954	0.993463	1.2323
		29.7845				29.7813						30.764					30.4579						28.5379					29.8953
	H3K4Me1	29.8281	29.6527	1.26403	2.79669	29.4565	29.4923	1.09485	0.824512		H3K4Me1	30.676	30.72	0.82051	2.2329	H3K4Me1	30.3477	30.4298	1.87753	1.1173		79 RHA Cr 100 1
		29.3455				29.239						32.7599					30.4838						79 TG4 WT				79 TG4 Mut
																							30.83					30.8101
R3	79 RHA Cr 100 1																					Inp	30.96	31	24.356		Inp	35.0346	30.7559	24.1119
		79 TG4 WT				79 TG4 Mut					79 RHA Cr 100 1												31.21					30.7017
		30.6563				32.0308						79 TG4 WT				79 TG4 Mut							31.3855					31.6915
	Inp	31.3756	31.0523	24.4083		32.0162	32.0689	25.4249				29.9164					31.7717					H3	31.5097	31.4476	0.733196		H3	31.0665	31.3571	0.659135
		31.1251				32.1597					Inp	29.938	29.8811	23.2371		Inp	32.369	31.9326	25.2886				30.206					31.3134
		31.3851				31.9514						29.7887					31.6571						30.8879					31.1384
	H3	31.7196	31.677	0.64852		32.1325	32.1564	0.941029				31.3189					38.9466					H3K4Me1	30.8302	30.8388	1.11811	1.52498	H3K4Me1	30.9794	31.0077	0.839765	1.27404
		31.9262				32.3855					H3	31.6361	31.7341	0.276782		H3	31.8168	32.0823	0.901373				30.7983					30.9053
		30.5692				32.1554						32.2473					32.3477					79 RHA WT 250
	H3K4Me1	30.5586	30.726	1.25372	1.9332	32.1142	32.051	1.01238	1.07582			30.8115					32.0014						79 TG4 WT				79 TG4 Mut
		31.0502				31.8835					H3K4Me1	30.7155	30.4017	0.696991	2.51819	H3K4Me1	31.5454	31.8019	1.09473	1.21451			35.69					34.0602
												29.6781					31.8589					Inp	36.28	36.0433	29.3993		Inp	34.4045	34.2084	27.5644
R4	79 RHA WT 250																						36.16					34.1604
		79 TG4 WT				79 TG4 Mut					79 RHA WT 250												36.5173					34.8516
		35.087				36.366						79 TG4 WT				79 TG4 Mut						H3	36.1187	36.2851	0.84562		H3	34.7733	34.6528	0.734819
	Inp	34.7721	34.9089	28.2649		35.4809	36.1538	29.5098				32.3534					34.084						36.2193					34.3333
		34.8675				36.6144					Inp	32.2405	32.2696	25.6256		Inp	34.4125	34.2326	27.5886				35.3353					34.2369
		35.3145				38.167						32.2149					34.2013					H3K4Me1	35.7602	35.3914	1.57112	1.85795	H3K4Me1	33.9258	34.2382	0.979403	1.33285
	H3	35.4168	35.2625	0.782516		36.6221	36.5457	0.762027				32.596					34.7383						35.0787					34.5521
		35.0562				36.4693					H3	32.43	32.4599	0.876347		H3	34.9092	34.6481	0.74968
		34.6884				36.1052						32.3537					34.2968
	H3K4Me1	34.6635	34.6568	1.19078	1.52174	36.7157	36.341	0.878206	1.15246			32.2845					34.6659
		34.6185				36.2021					H3K4Me1	32.2174	32.0192	1.18942	1.35724	H3K4Me1	34.5292	34.5133	0.823115	1.09795
												31.5557					34.3447
Compilation
		79 TG4 WT			79 TG4 Mut			WT/Mut
79 LHA Cr 100 1	R1	1.4453	1.30863	1.65389	0.961741	0.911636	0.932341	1.5028	1.43547	1.77391	1.57073	0.14628
79 LHA Cr 200 2	R2	2.79669	2.2329	2.31477	0.824512	1.1173	1.2323	3.39194	1.99848	1.87842	2.42295	0.686932
79 RHA Cr 100 1	R3	1.9332	2.51819	1.52498	1.07582	1.21451	1.27404	1.79695	2.07343	1.19697	1.68912	0.365849
79 RHA WT 250	R4	1.52174	1.35724	1.85795	1.15246	1.09795	1.33285	1.32042	1.23616	1.39397	1.31685	0.0644749

## Sheet: B
	Rep 1										Rep 2											Rep 3
R1											79 LHA Cr 100 1											79 LHA Cr 100 1
	79 LHA Cr 100 1											79 TG4 WT				79 TG4 Mut						79 TG4 WT	79 TG4 WT				79 TG4 Mut
		79 TG4 WT				79 TG4 Mut						28.6901					27.7352						28.9801					29.3675
		29.1962				28.8809					Inp	28.5862	28.7388	22.0948		Inp	28.0008	27.9499	21.3059			Inp	28.2599	28.9291	22.2851		Inp	29.2604	29.627	22.983
	Inp	29.0358	29.125	22.481		29.0545	28.8854	22.2414				28.94					28.1137						29.5474					30.253
		29.1428				28.721						29.0867					28.1524						28.7442					29.063
		29.854				29.1033					H3	29.3032	29.195	0.728811		H3	28.0537	28.0627	0.924701			H3	28.5878	28.7176	1.15782		H3	28.8248	28.9439	1.60539
	H3	29.6191	29.7967	0.627695		28.8672	29.0552	0.888919				30.8565					27.9819						28.8207					30.4545
		29.9169				29.195						29.0226					28.1764						28.4219					29.2588
		29.3211				29.2422					H3K27Ac	29.003	29.0128	0.826917	1.13461	H3K27Ac	28.2816	28.5166	0.675099	0.730073		H3K27Ac	28.5355	28.6624	1.20294	1.03897	H3K27Ac	29.3345	29.2966	1.25717	0.783093
	H3K27Ac	29.242	29.2413	0.922455	1.46959	29.2023	29.2856	0.757704	0.852388			33.8399					29.0918						29.0298					30.4502
		29.1607				29.4123					79 LHA Cr 200 2											79 LHA Cr 200 2
R2												79 TG4 WT				79 TG4 Mut						79 TG4 WT	79 TG4 WT				79 TG4 Mut
	79 LHA Cr 200 2											30.511					29.9469						32.5321					32.0545
		79 TG4 WT				79 TG4 Mut					Inp	30.3585	30.4348	23.7908		Inp	29.7029	29.9447	23.3007			Inp	32.1427	32.2871	25.6431		Inp	31.005	31.3388	24.6948
		30.117				29.831						32.101					30.1842						32.1865					30.9568
	Inp	29.9191	29.9909	23.3469		29.4056	29.6231	22.9791				31.5797					30.0153						32.3148					30.5449
		29.9365				29.6327					H3	32.1782	31.8789	0.367464		H3	30.0705	30.2553	0.806189			H3	32.122	32.5078	0.858056		H3	30.6062	30.5898	1.68042
		30.7633				29.3941						33.4314					30.6801						33.0866					30.6183
	H3	31.2995	31.1364	0.451972		29.1287	29.2139	1.32787				30.8121					30.2266						32.6576					31.7967
		31.3463				29.1189					H3K27Ac	30.6059	30.709	0.8268	2.25001	H3K27Ac	30.7514	30.489	0.685644	0.850476		H3K27Ac	31.3606	31.3947	1.85605	2.16309	H3K27Ac	31.346	31.5126	0.886398	0.527486
		30.2527				29.6029						32.5853					31.8899						31.4288					31.3951
	H3K27Ac	29.8892	30.0775	0.941625	2.08337	30.1255	29.9277	0.809584	0.609684		79 RHA Cr 100 1											79 RHA Cr 100 1
		30.0905				30.0548						79 TG4 WT				79 TG4 Mut						79 TG4 WT	79 TG4 WT				79 TG4 Mut
R3												29.9164					30.8101						29.868					31.7717
	79 RHA Cr 100 1										Inp	29.938	29.8811	23.2371		Inp	35.0346	30.7559	24.1119			Inp	30.0579	30.0766	23.4326		Inp	32.369	31.9326	25.2886
		79 TG4 WT				79 TG4 Mut						29.7887					30.7017						30.3039					31.6571
		30.6563				32.0308						31.3189					31.6915						30.4096					38.9466
	Inp	31.3756	31.0523	24.4083		32.0162	32.0689	25.4249			H3	31.6361	31.7341	0.276782		H3	31.0665	31.3571	0.659135			H3	30.1914	30.3653	0.818559		H3	31.8168	32.0823	0.901373
		31.1251				32.1597						32.2473					31.3134						30.4948					32.3477
		31.3851				31.9514						30.3217					31.0837						28.8711					31.41
	H3	31.7196	31.677	0.64852		32.1325	32.1564	0.941029			H3K27Ac	30.9268	30.5071	0.647868	2.34072	H3K27Ac	30.2499	30.774	0.987461	1.49812		H3K27Ac	29.7523	29.4086	1.58873	1.94089	H3K27Ac	32.2627	32.2276	0.814997	0.904172
		31.9262				32.3855						30.2729					30.9884						29.6023					33.0101
		31.6262				32.399					79 RHA WT 250											79 RHA WT 250
	H3K27Ac	30.9787	31.3744	0.799849	1.23335	31.9394	32.3597	0.81738	0.868603			79 TG4 WT				79 TG4 Mut						79 TG4 WT	79 TG4 WT				79 TG4 Mut
		31.5182				32.7407						32.3534					34.0602						32.3271					34.084
R4											Inp	32.2405	32.2696	25.6256		Inp	34.4045	34.2084	27.5644			Inp	32.1531	32.3874	25.7434		Inp	34.4125	34.2326	27.5886
	79 RHA WT 250											32.2149					34.1604						32.6822					34.2013
		79 TG4 WT				79 TG4 Mut						32.596					34.8516						33.3798					34.7383
		35.087				36.366					H3	32.43	32.4599	0.876347		H3	34.7733	34.6528	0.734819			H3	32.7578	33.1333	0.596262		H3	34.9092	34.6481	0.74968
	Inp	34.7721	34.9089	28.2649		35.4809	36.1538	29.5098				32.3537					34.3333						33.2622					34.2968
		34.8675				36.6144						32.67					34.3099						32.9214					34.5575
		35.3145				38.167					H3K27Ac	32.6896	32.7131	0.735276	0.839023	H3K27Ac	34.404	34.301	0.937686	1.27608		H3K27Ac	32.942	32.8859	0.707787	1.18704	H3K27Ac	35.6514	35.3787	0.451807	0.602667
	H3	35.4168	35.2625	0.782516		36.6221	36.5457	0.762027				32.7797					34.1892						32.7943					35.9271
		35.0562				36.4693
		35.0165				35.7764
	H3K27Ac	35.2862	35.1501	0.845945	1.08106	36.6728	36.1555	0.998686	1.31057
		35.1475				36.0174
Compilation
		79 TG4 WT			79 TG4 Mut			WT/Mut
79 LHA Cr 100 1	R1	1.46959	1.13461	1.03897	0.852388	0.730073	0.783093	1.72409	1.55411	1.32675	1.53498	0.162776
79 LHA Cr 200 2	R2	2.08337	2.25001	2.16309	0.609684	0.850476	0.527486	3.41713	2.64559	4.10075	3.38783	0.594427
79 RHA Cr 100 1	R3	1.23335	2.34072	1.94089	0.868603	1.49812	0.904172	1.41992	1.56244	2.14659	1.70965	0.314395
79 RHA WT 250	R4	1.08106	0.839023	1.18704	1.31057	1.27608	0.602667	0.82488	0.657501	1.96965	1.15068	0.583118

## Sheet: C
	Rep 1										Rep 2											Rep 3
R1	79 LHA Cr 100 1										79 LHA Cr 100 1											79 LHA Cr 100 1
		79 TG4 WT				79 TG4 Mut						79 TG4 WT				79 TG4 Mut							79 TG4 WT				79 TG4 Mut
		28.6901					29.3675					28.9801					27.7352						28.4414				30.3055
	Inp	28.5862	28.7388	22.0948		Inp	29.2604	29.627	22.983		Inp	28.2599	28.9291	22.2851		Inp	28.0008	27.9499	21.3059			Inp	28.154	28.2495	21.6055		29.588	30.2241	23.5801
		28.94					30.253					29.5474					28.1137						28.1529				30.7787
		29.0867					29.063					28.7442					28.1524						28.9895				29.988
	H3	29.3032	29.195	0.728811		H3	28.8248	28.9439	1.60539		H3	28.5878	28.7176	1.15782		H3	28.0537	28.0627	0.924701			H3	28.4576	28.6208	0.773019		29.4155	29.7563	1.38285
		30.8565					30.4545					28.8207					27.9819						28.4152				29.8654
		29.7303					29.3878					29.4177					27.8743						29.1125				30.4684
	H3K27Me3	29.4483	29.5893	0.554514	0.760848	H3K27Me3	29.5301	29.4589	1.12341	0.699775	H3K27Me3	29.3092	29.3643	0.739525	0.638719	H3K27Me3	28.0368	27.9629	0.990891	1.07158		H3K27Me3	28.7725	28.7309	0.716175	0.926465	30.463	30.3827	0.895775	0.647775
		32.1596					30.4136					29.366					27.9777						28.3078				30.2168
	79 LHA Cr 200 2										79 LHA Cr 200 2											79 LHA Cr 200 2
R2		79 TG4 WT				79 TG4 Mut						79 TG4 WT				79 TG4 Mut							79 TG4 WT				79 TG4 Mut
		30.511					32.0545					32.5321					29.9469						30.2266				31.3566
	Inp	30.3585	30.4348	23.7908		Inp	31.005	31.3388	24.6948		Inp	32.1427	32.2871	25.6431		Inp	29.7029	29.9447	23.3007			Inp	32.8228	31.0693	24.4253		31.0511	31.392	24.748
		32.101					30.9568					32.1865					30.1842						30.1585				31.7684
		31.5797					30.5449					32.3148					30.0153						30.5058				32.0046
	H3	32.1782	31.8789	0.367464		H3	30.6062	30.5898	1.68042		H3	32.122	32.5078	0.858056		H3	30.0705	30.2553	0.806189			H3	30.1445	30.5668	1.4166		32.4011	32.0901	0.616326
		33.4314					30.6183					33.0866					30.6801						31.0499				31.8647
		30.5923					31.3608					32.8464					29.9337						30.6956				32.2828
	H3K27Me3	31.2414	31.4149	0.50688	1.3794	H3K27Me3	31.519	31.4148	0.948561	0.564479	H3K27Me3	32.106	32.5999	0.80501	0.938179	H3K27Me3	30.8762	30.3346	0.763116	0.946572		H3K27Me3	29.8634	30.4209	1.56729	1.10637	33.243	32.8296	0.369144	0.598944
		32.411					31.3646					32.8473					30.1938						30.7037				32.9631
	79 RHA Cr 100 1										79 RHA Cr 100 1											79 RHA Cr 100 1
		79 TG4 WT				79 TG4 Mut						79 TG4 WT				79 TG4 Mut							79 TG4 WT				79 TG4 Mut
R3		29.9164					31.7717					29.868					30.8101						30.7308				35.4357
	Inp	29.938	29.8811	23.2371		Inp	32.369	31.9326	25.2886		Inp	30.0579	30.0766	23.4326		Inp	35.0346	30.7559	24.1119			Inp	30.5463	30.6688	24.0248		34.0276	34.3975	27.7535
		29.7887					31.6571					30.3039					30.7017						30.7292				33.7294
		31.3189					38.9466					30.4096					31.6915						31.4137				35.4251
	H3	31.6361	31.7341	0.276782		H3	31.8168	32.0823	0.901373		H3	30.1914	30.3653	0.818559		H3	31.0665	31.3571	0.659135			H3	31.1499	31.2106	0.686824		34.1008	34.847	0.732246
		32.2473					32.3477					30.4948					31.3134						31.0683				35.015
		31.4808					32.1783					30.7327					31.0034						31.6126				36.0172
	H3K27Me3	31.1489	31.3519	0.360733	1.30331	H3K27Me3	33.9061	32.4182	0.714142	0.792282	H3K27Me3	31.4618	30.9706	0.538074	0.657343	H3K27Me3	30.8337	30.9786	0.856902	1.30004		H3K27Me3	31.3761	31.17	0.70644	1.02856	34.8576	35.3558	0.514629	0.702809
		31.426					32.658					30.7172					31.0986						30.5212				35.1926
	79 RHA WT 250										79 RHA WT 250											79 RHA WT 250
		79 TG4 WT				79 TG4 Mut						79 TG4 WT				79 TG4 Mut							79 TG4 WT				79 TG4 Mut
		32.3534					34.084					32.3271					34.0602						32.9398				37.5659
R4	Inp	32.2405	32.2696	25.6256		Inp	34.4125	34.2326	27.5886		Inp	32.1531	32.3874	25.7434		Inp	34.4045	34.2084	27.5644			Inp	33.0715	33.0587	26.4147		36.6324	37.088	30.444
		32.2149					34.2013					32.6822					34.1604						33.1648				37.0658
		32.596					34.7383					33.3798					34.8516						33.2228				36.5391
	H3	32.43	32.4599	0.876347		H3	34.9092	34.6481	0.74968		H3	32.7578	33.1333	0.596262		H3	34.7733	34.6528	0.734819			H3	33.5975	33.536	0.71824		37.1524	36.8457	1.18276
		32.3537					34.2968					33.2622					34.3333						33.7877				38.5644
		32.9708					34.4595					33.8864					33.5563						33.8534				37.4567
	H3K27Me3	33.1126	33.0343	0.588525	0.671566	H3K27Me3	35.008	35.0169	0.580561	0.774411	H3K27Me3	33.5962	33.7443	0.390388	0.654726	H3K27Me3	34.2606	34.185	1.01621	1.38294		H3K27Me3	34.1532	33.7893	0.602598	0.838992	37.9913	37.724	0.643426	0.544006
		33.0195					35.5832					33.7504					34.1095						33.3613				39.0665
Compilation
		79 TG4 WT			79 TG4 Mut			WT/Mut
79 LHA Cr 100 1	R1	0.760848	0.638719	0.926465	0.699775	1.07158	0.647775	1.08728	0.596054	1.43023	1.03785	0.342338
79 LHA Cr 200 2	R2	1.3794	0.938179	1.10637	0.564479	0.946572	0.598944	2.44367	0.991134	1.8472	1.76067	0.596143
79 RHA Cr 100 1	R3	1.30331	0.657343	1.02856	0.792282	1.30004	0.702809	1.64501	0.505633	1.4635	1.20471	0.499848
79 RHA WT 250	R4	0.671566	0.654726	0.838992	0.774411	1.38294	0.544006	0.867195	0.47343	1.54225	0.960958	0.441352

## Sheet: D
	Rep 1										Rep 2											Rep 3
R1	79 LHA Cr 100 1										79 LHA Cr 100 1											79 LHA Cr 100 1
		79 TG4 WT				79 TG4 Mut						79 TG4 WT				79 TG4 Mut							79 TG4 WT					79M TG4 Mut
		28.9801				28.8809						28.9801					29.3675						28.6901					28.1566
	Inp	28.2599	28.9291	22.2851		29.0545	28.8854	22.2414			Inp	28.2599	28.9291	22.2851		Inp	29.2604	29.627	22.983			Inp	28.5862	28.7388	22.0948		Inp	28.3581	28.2305	21.5865
		29.5474				28.721						29.5474					30.253						28.94					28.1766
		28.7613				29.1033						28.7442					29.063						29.0867					28.2186
	H3	29.0171	28.78	1.10875		28.8672	29.0552	0.888919			H3	28.5878	28.7176	1.15782		H3	28.8248	28.9439	1.60539			H3	29.3032	29.195	0.728811		H3	28.7798	28.4727	0.84535
		28.5617				29.195						28.8207					30.4545						30.8565					28.4197
		28.461				29.2605						28.8564					29.0908						29.3634					28.8422
	H3K9Me3	28.7078	28.7686	1.11758	1.00797	28.7767	28.9952	0.92664	1.04243		H3K9Me3	28.5576	28.8245	1.07514	0.928587	H3K9Me3	28.9942	29.0425	1.49933	0.933938		H3K9Me3	29.5433	29.4534	0.609306	0.836027	H3K9Me3	28.5701	28.8071	0.670453	0.793107
		29.1371				28.9484						29.0594					30.2075						32.363					29.0091
	79 LHA Cr 200 2										79 LHA Cr 200 2											79 LHA Cr 200 2
R2		79 TG4 WT				79 TG4 Mut						79 TG4 WT				79 TG4 Mut							79 TG4 WT					79M TG4 Mut
		32.5321				29.831						32.5321					32.0545						30.511					29.5029
	Inp	32.1427	32.2871	25.6431		29.4056	29.6231	22.9791			Inp	32.1427	32.2871	25.6431		Inp	31.005	31.3388	24.6948			Inp	30.3585	30.4348	23.7908		Inp	29.6905	29.7403	23.0963
		32.1865				29.6327						32.1865					30.9568						32.101					30.0275
		33.1786				29.3941						32.3148					30.5449						31.5797					29.6653
	H3	33.3353	33.257	0.510506		29.1287	29.2139	1.32787			H3	32.122	32.5078	0.858056		H3	30.6062	30.5898	1.68042			H3	32.1782	31.8789	0.367464		H3	29.0512	29.4629	1.2119
		34.5073				29.1189						33.0866					30.6183						33.4314					29.6721
		32.3044				29.4085						29.9588					30.518						31.3081					29.217
	H3K9Me3	32.2761	32.2902	0.99773	1.95439	29.4075	29.5052	1.08504	0.817129		H3K9Me3	32.238	32.6324	0.787077	0.917279	H3K9Me3	31.0689	30.7303	1.52452	0.907223		H3K9Me3	31.1062	31.2072	0.585383	1.59303	H3K9Me3	30.0714	29.6298	1.07948	0.890733
		33.5053				29.6998						33.0268					30.6039						32.653					29.601
	79 RHA Cr 100 1										79 RHA Cr 100 1											79 RHA Cr 100 1
		79 TG4 WT				79 TG4 Mut						79 TG4 WT				79 TG4 Mut							79 TG4 WT					79M TG4 Mut
R3		29.868				32.0308						29.868					31.7717						29.9164					31.0469
	Inp	30.0579	30.0766	23.4326		32.0162	32.0689	25.4249			Inp	30.0579	30.0766	23.4326		Inp	32.369	31.9326	25.2886			Inp	29.938	29.8811	23.2371		Inp	31.2516	31.3858	24.7418
		30.3039				32.1597						30.3039					31.6571						29.7887					31.8588
		30.3248				31.9514						30.4096					38.9466						31.3189					32.2737
	H3	30.2333	30.4492	0.772279		32.1325	32.1564	0.941029			H3	30.1914	30.3653	0.818559		H3	31.8168	32.0823	0.901373			H3	31.6361	31.7341	0.276782		H3	32.1018	32.2754	0.539713
		30.7896				32.3855						30.4948					32.3477						32.2473					32.4507
		30.1971				32.848						30.6511					32.4437						31.4911					31.329
	H3K9Me3	30.603	30.3101	0.850449	1.10122	32.3779	32.6724	0.658092	0.699333		H3K9Me3	30.4908	30.6831	0.65673	0.802299	H3K9Me3	32.1609	32.4771	0.685566	0.76058		H3K9Me3	31.455	31.3987	0.349218	1.26171	H3K9Me3	32.5218	32.091	0.613312	1.13637
		30.1304				32.7914						30.9073					32.8267						31.25					32.4221
	79 RHA WT 250										79 RHA WT 250											79 RHA WT 250
		79 TG4 WT				79 TG4 Mut						79 TG4 WT				79 TG4 Mut							79 TG4 WT					79M TG4 Mut
		32.3271				36.366						32.3271					34.084						32.3534					36.1434
R4	Inp	32.1531	32.3874	25.7434		35.4809	36.1538	29.5098			Inp	32.1531	32.3874	25.7434		Inp	34.4125	34.2326	27.5886			Inp	32.2405	32.2696	25.6256		Inp	36.5179	36.2815	29.6375
		32.6822				36.6144						32.6822					34.2013						32.2149					36.1832
		32.4951				38.167						33.3798					34.7383						32.596					35.5059
	H3	32.2917	32.2688	1.08564		36.6221	36.5457	0.762027			H3	32.7578	33.1333	0.596262		H3	34.9092	34.6481	0.74968			H3	32.43	32.4599	0.876347		H3	36.7364	36.111	1.1253
		32.0195				36.4693						33.2622					34.2968						32.3537					36.0909
		33.653				37.2218						33.1665					35.0038						32.7334					36.0592
	H3K9Me3	32.7193	33.1493	0.589688	0.543172	36.5894	36.8042	0.637036	0.835975		H3K9Me3	33.2607	33.0869	0.615729	1.03265	H3K9Me3	35.0674	34.8578	0.648249	0.864701		H3K9Me3	33.4788	32.9242	0.635171	0.724793	H3K9Me3	36.9909	36.3498	0.953681	0.847491
		33.0754				36.6013						32.8335					34.5023						32.5604					35.9993
Compilation
		79 TG4 WT			79 TG4 Mut			WT/Mut
79 LHA Cr 100 1	R1	1.00797	0.928587	0.836027	1.04243	0.933938	0.793107	0.966933	0.994271	1.05412	1.00511	0.0364073
79 LHA Cr 200 2	R2	1.95439	0.917279	1.59303	0.817129	0.907223	0.890733	2.39178	1.01108	1.78845	1.73044	0.565158
79 RHA Cr 100 1	R3	1.10122	0.802299	1.26171	0.699333	0.76058	1.13637	1.57467	1.05485	1.1103	1.24661	0.233078
79 RHA WT 250	R4	0.543172	1.03265	0.724793	0.835975	0.864701	0.847491	0.649747	1.19422	0.855223	0.899732	0.224499

## Sheet: E
	Rep 1										Rep 2											Rep 3
R1	79 LHA Cr 100 1										79 LHA Cr 100 1											79 LHA Cr 100 1
		79 TG4 WT				79 TG4 Mut						79 TG4 WT				79 TG4 Mut							79M TG4 WT					79M TG4 Mut
		28.4414				30.3055						27.6396				27.3799							27.7348					28.1566
	Inp	28.154	28.2495	21.6055		29.588	30.2241	23.5801			Inp	27.496	27.4976	20.8536		27.3486	27.3096	20.6656				Inp	27.8275	27.831	21.187		Inp	28.3581	28.2305	21.5865
		28.1529				30.7787						27.357				27.2004							27.9306					28.1766
		28.9895				29.988						28.0184				28.288							28.2811					28.2186
	H3	28.4576	28.6208	0.773019		29.4155	29.7563	1.38285			H3	27.678	27.847	0.784816		28.1602	28.1851	0.545025				H3	28.7868	28.4727	0.640886		H3	28.7798	28.4727	0.84535
		28.4152				29.8654						27.8446				28.1072							28.3502					28.4197
		28.5491				30.636						28.0124				28.4953							28.1141					28.6368
	H3K4Me3	27.8671	28.1416	1.07753	1.39393	30.4212	30.4645	0.846396	0.612067		H3K4Me3	27.7532	27.937	0.737327	0.939491	28.3747	28.4916	0.440697	0.808582			H3K4Me3	28.1323	28.102	0.82864	1.29296	H3K4Me3	28.7258	28.7687	0.688555	0.814521
		28.0086				30.3363						28.0455				28.6048							28.0597					28.9434
R2	79 LHA Cr 200 2										79 LHA Cr 200 2											79 LHA Cr 200 2
		79 TG4 WT				79 TG4 Mut						79 TG4 WT				79 TG4 Mut							79M TG4 WT					79M TG4 Mut
		30.2266				31.3566						28.9351				28.7805							31.2664					29.5029
	Inp	32.8228	31.0693	24.4253		31.0511	31.392	24.748			Inp	29.0281	28.9622	22.3182		28.3092	28.4266	21.7826				Inp	30.6612	30.5804	23.9364		Inp	29.6905	29.7403	23.0963
		30.1585				31.7684						28.9235				28.19							29.8136					30.0275
		30.5058				32.0046						29.4918				29.1485							30.4582					29.6653
	H3	30.1445	30.5668	1.4166		32.4011	32.0901	0.616326			H3	28.8404	29.1476	0.879335		29.398	29.2198	0.576977				H3	31.1087	30.7791	0.871255		H3	29.0512	29.4629	1.2119
		31.0499				31.8647						29.1106				29.1129							30.7705					29.6721
		29.6949				31.5869						29.071				29.1389							29.851					29.7246
	H3K4Me3	29.6842	29.5498	2.86679	2.02371	31.4878	31.5397	0.902617	1.46451		H3K4Me3	29.4711	29.1233	0.894297	1.01702	29.4732	29.3872	0.513773	0.890458			H3K4Me3	29.9042	29.6773	1.86996	2.14628	H3K4Me3	30.0996	29.9386	0.871476	0.719097
		29.2701				31.5444						28.8277				29.5495							29.2766					29.9916
R3											79 RHA Cr 100 1											79 RHA Cr 100 1
	79 RHA Cr 100 1											79 TG4 WT				79 TG4 Mut							79M TG4 WT					79M TG4 Mut
		79 TG4 WT				79 TG4 Mut						29.6026				30.1658							30.0573					31.0469
		30.7308				35.4357					Inp	29.1499	29.3125	22.6685		30.2782	30.3673	23.7233				Inp	29.7775	30.047	23.403		Inp	31.2516	31.3858	24.7418
	Inp	30.5463	30.6688	24.0248		34.0276	34.3975	27.7535				29.1852				30.6578							30.3062					31.8588
		30.7292				33.7294						29.5572				30.8486							31.0543					32.2737
		31.4137				35.4251					H3	29.5967	29.5491	0.848675		31.5919	31.353	0.504919				H3	30.9238	31.2294	0.440564		H3	32.1018	32.2754	0.539713
	H3	31.1499	31.2106	0.686824		34.1008	34.847	0.732246				29.4934				31.6185							31.7102					32.4507
		31.0683				35.015						29.6237				31.1223							30.5883					32.0649
		30.9817				34.662					H3K4Me3	29.8561	29.8587	0.684767	0.806866	31.2559	31.3122	0.519408	1.0287			H3K4Me3	30.7299	30.5681	0.696766	1.58153	H3K4Me3	32.1721	32.1465	0.590154	1.09346
	H3K4Me3	31.4256	31.0879	0.747799	1.08878	33.5777	34.1574	1.18098	1.61282			30.0963				31.5584							30.3861					32.2025
		30.8563				34.2325
R4											79 RHA WT 250											79 RHA WT 250
	79 RHA WT 250											79 TG4 WT				79 TG4 Mut							79M TG4 WT					79M TG4 Mut
		79 TG4 WT				79 TG4 Mut						32.1269				33.485							32.548					36.1434
		32.9398				37.5659					Inp	32.5447	32.4245	25.7805		33.689	33.7223	27.0783				Inp	32.7684	32.6406	25.9966		Inp	36.5179	36.2815	29.6375
	Inp	33.0715	33.0587	26.4147		36.6324	37.088	30.444				32.602				33.9929							32.6054					36.1832
		33.1648				37.0658						32.5809				35.0882							33.29					35.5059
		33.2228				36.5391					H3	32.6767	32.717	0.816407		35.3697	35.2792	0.339843				H3	33.6435	33.6578	0.49402		H3	36.7364	36.111	1.1253
	H3	33.5975	33.536	0.71824		37.1524	36.8457	1.18276				32.8934				35.3796							34.0399					36.0909
		33.7877				38.5644						33.2539				35.0607							34.4104					36.1796
		33.1027				37.8829					H3K4Me3	32.8357	33.0778	0.635763	0.778733	35.8911	35.4181	0.308639	0.90818			H3K4Me3	34.7206	34.5763	0.261377	0.529083	H3K4Me3	35.8878	35.9915	1.22253	1.0864
	H3K4Me3	33.1661	33.1483	0.939689	1.30832	37.5357	37.776	0.620643	0.524743			33.1437				35.3026							34.5977					35.9071
		33.1761				37.9095
Compilation
		79 TG4 WT			79 TG4 Mut			WT/Mut
79 LHA Cr 100 1	R1	1.39393	0.939491	1.29296	0.612067	0.808582	0.814521	2.27741	1.1619	1.58739	1.67557	0.459656
79 LHA Cr 200 2	R2	2.02371	1.01702	2.14628	1.46451	0.890458	0.719097	1.38183	1.14213	2.9847	1.83622	0.817972
79 RHA Cr 100 1	R3	1.08878	0.806866	1.58153	1.61282	1.0287	1.09346	0.675078	0.784358	1.44636	0.968597	0.34076
79 RHA WT 250	R4	1.30832	0.778733	0.529083	0.524743	0.90818	1.0864	2.49326	0.857466	0.487004	1.27924	0.871661
