# Supplementary material for: Artificially inserted strong promoter containing multiple G-quadruplexes induces long-range chromatin modification
Source: eLife. 2024 Aug 19;13:RP96216. doi: 10.7554/eLife.96216 (PMC11333042; doi:10.7554/eLife.96216)
Supplement: Figure 3—source data 1. [file elife-96216-fig3-data1.xlsx]

## Sheet: A
Rep1													Rep2													Rep3
HEK				79M TG4 WT				79M TG4 Mut					HEK				79M TG4 WT				79M TG4 Mut					HEK				79M TG4 WT				79M TG4 Mut
	15.4024			16.7997				16.5699						14.8164			13.8754				13.8774						14.384			15.5673				16.0029
GAPDH	15.2899	15.4404		16.7912	16.7812			16.6879	16.6841				GAPDH	14.567	14.6758		13.9539	13.9182			13.7212	13.812				GAPDH	14.5305	14.4753		15.3063	15.4524			16.1035	16.0752
	15.6289			16.7526				16.7945						14.644			13.9252				13.8372						14.5114			15.4836				16.1194
	24.9994			23.7613				23.9968						20.0275			19.4603				20.341						19.8892			20.5037				21.7158
SYT1	25.0422	24.9939	24.9939	23.6409	23.6497	23.6497	2.5389	23.812	23.8498	23.8498	2.21011		PAWR	20.0177	20.3107	20.3107	19.3773	19.4317	19.4317	1.83904	20.3864	20.3594	20.3594	0.966804		PAWR	19.8937	19.8753	19.8753	20.4566	20.4559	20.4559	0.668697	21.8625	21.7408	21.7408	0.274431
	24.9401			23.5469				23.7406						20.8868			19.4576				20.3508						19.843			20.4072				21.644
	21.1314			22.0477				22.609						21.1787			20.5913				21.0527						20.8818			21.2963				22.0242
PAWR	21.0253	21.0611	21.0611	22.0988	22.0642	22.0642	0.498931	22.5042	22.5735	22.5735	0.35055		PPP1R12A	21.0738	21.2383	21.2383	20.6968	20.6494	20.6494	1.50411	21.0741	21.1848	21.1848	1.03779		PPP1R12A	20.7988	20.8138	20.8138	21.1595	21.2442	21.2442	0.742073	22.1446	22.0477	22.0477	0.425158
	21.0268			22.0462				22.6072						21.4625			20.6602				21.4277						20.7608			21.2767				21.9744
	21.8574			22.4049				22.796						23.9123			22.5452				22.1972					HEK				79M TG4 WT				79M TG4 Mut
PPP1R12A	21.7195	21.8792	21.8792	22.3563	22.4081	22.4081	0.693101	23.1465	22.9985	22.9985	0.460318		SYT1	24.0783	24.0706	24.0706	22.59	22.583	22.583	2.80425	22.2441	22.2227	22.2227	3.59969			14.8164			16.0463				16.0243
	22.0607			22.463				23.0529						24.2213			22.6139				22.2269					GAPDH	14.567	14.6758		16.0573	16.0461			16.018	16.0262
																											14.644			16.0347				16.0362
HEK				79M TG4 WT				79M TG4 Mut					HEK				79M TG4 WT				79M TG4 Mut						23.9123			23.0205				22.8801
	14.6543			15.4526				15.3288						15.6076			13.8754				13.8774					SYT1	24.0783	24.0706	9.39481	22.9697	22.9869	6.94081	5.47935	22.8866	22.8498	6.82364	5.94291
GAPDH	14.7657	14.657		15.4989	15.5129			15.2894	15.2553				GAPDH	15.0282	15.2178		13.9539	13.9182			13.7212	13.812					24.2213			22.9704				22.7827
	14.551			15.5872				15.1477						15.0176			13.9252				13.8372					HEK				79M TG4 WT				79M TG4 Mut
	31.6488			30.054				31.2369						31.8749			30.3649				31.9869						15.5795			15.929				16.4042
NAV3	31.8302	31.6371	31.6371	29.4578	29.6777	29.6777	3.88884	31.9047	31.5998	31.5998	1.02615		NAV3	32.2614	32.1447	32.1447	30.1405	30.465	30.465	3.20371	31.7616	31.964	31.964	1.13343		GAPDH	15.4975	15.5948		15.9395	15.942			16.4165	16.406
	31.4322			29.5214				31.6579						32.298			30.8896				32.1436						15.7073			15.9576				16.3972
	22.9466			22.4393				21.6581						22.6449			21.314				21.1957						32.3955			30.0921				32.9636
OSBPL8	22.3456	22.7373	22.7373	22.321	22.3478	22.3478	1.30997	21.8599	21.8107	21.8107	1.90088		OSBPL8	23.0018	22.8234	22.8234	21.577	21.467	21.467	2.56045	21.3356	21.2233	21.2233	3.03162		NAV3	31.8822	32.0914	32.0914	30.5607	30.0779	30.0779	4.03777	31.9825	31.9849	31.9849	1.07667
	22.9197			22.2831				21.914						27.1334			21.51				21.1385						31.9966			29.5808				31.9872
	23.8861			23.3788				23.7685						24.2595			23.7247				22.6836						22.8941			23.1977				23.5306
METTL25	23.8554	23.7872	23.7872	23.6311	23.4993	23.4993	1.22087	23.7339	23.7336	23.7336	1.03782		METTL25	24.2351	24.2569	24.2569	23.4336	23.667	23.667	1.50509	22.5801	22.6891	22.6891	2.96455		OSBPL8	23.4046	23.1505	23.1505	22.9385	23.024	23.024	1.09164	23.7684	23.6381	23.6381	0.71321
	23.6201			23.488				23.6986						24.2761			23.8428				22.8036						23.1527			22.9356				23.6152
	22.5309			23.8057				23.5787						24.8427			22.8273				22.0933					HEK				79M TG4 WT				79M TG4 Mut
ATXN7L3B	22.3816	22.502	22.502	23.7344	23.7791	23.7791	0.412619	23.6173	23.629	23.629	0.457877		ATXN7L3B	24.9397	24.8312	24.8312	22.8547	22.8504	22.8504	3.94705	22.148	22.0927	22.0927	6.67364			14.667			15.3976				16.2144
	22.5935			23.7973				23.6908						24.7111			22.8692				22.0367					GAPDH	14.5737	14.6073		15.5507	15.5792			16.3724	16.3364
	20.8942			19.889				20.4542						21.8295			20.1692				20.4751						14.5813			15.7894				16.4223
SLC6A15	20.8152	20.8427	20.8427	19.9328	19.9263	19.9263	1.88739	20.5632	20.4885	20.4885	1.27835		SLC6A15	21.9669	21.9566	21.9566	20.1037	20.1324	20.1324	3.54111	20.4501	20.4681	20.4681	2.80599			23.29			23.5111				24.3863
	20.8188			19.9572				20.448						22.0735			20.1244				20.4792					METTL25	26.7855	23.1489	0.646913	26.0852	23.7781	-0.000983601	1.56688	24.2038	24.2719	0.642977	1.00273
																											23.0078			24.0452				24.2257
Compilation
		79M TG4 WT			79M TG4 WT		79M TG4 Mut			79M TG4 Mut
PAWR	PAWR (+0.21 Mb)	1.26374	1.08774	1.31636	1.22261	0.0977589	0.830125	0.53125	0.831887	0.731087	0.141308
PPP1R12A	PPP1R12A (+0.46 Mb)	1.75555	0.889637	1.4608	1.36866	0.359462	1.09006	0.570254	1.28879	0.983035	0.302946
SYT1	SYT1 (-0.61 Mb)	6.43076	1.65863	5.47935	4.52291	2.06226	5.23367	1.97799	5.94291	4.38486	1.72636
NAV3	NAV3 (-1.6Mb)	7.03838	1.30142	5.13662	4.49214	2.38603	1.55355	0.427746	1.88924	1.29018	0.625042
OSBPL8	OSBPL8 (-2.9Mb)	2.3709	1.04011	1.38872	1.59991	0.563441	2.87787	1.14411	1.25147	1.75782	0.793211
METTL25	METTL25 (+2.9Mb)	2.20964	0.611401	1.26812	1.36305	0.655923	1.57122	1.11879	1.52203	1.40402	0.20268
ATXN7L3B	ATXN7L3B (-4.9Mb)	0.746796	1.60338	2.40355	1.58457	0.676498	0.69321	2.51857	6.22456	3.14545	2.30126
SLC6A15	SLC6A15 (+5.4Mb)	3.41597	1.43848	3.07752	2.64399	0.863553	1.93538	1.05895	2.36561	1.78665	0.54371
	Ratio
	PAWR (+0.21 Mb)	1.52235	2.04751	1.58237	1.71741	0.234697
	PPP1R12A (+0.46 Mb)	1.61051	1.56007	1.13347	1.43468	0.213985
	SYT1 (-0.61 Mb)	1.22873	0.838541	0.921997	0.996422	0.167762
	NAV3 (-1.6Mb)	4.53051	3.0425	2.71888	3.43063	0.788874
	OSBPL8 (-2.9Mb)	0.823836	0.909103	1.10967	0.947536	0.119814
	METTL25 (+2.9Mb)	1.40632	0.546483	0.833173	0.928659	0.357462
	ATXN7L3B (-4.9Mb)	1.0773	0.636623	0.38614	0.700021	0.285704
	SLC6A15 (+5.4Mb)	1.76502	1.35839	1.30094	1.47478	0.206562
																											23.9799			23.7098				23.1045
																										ATXN7L3B	24.0378	23.9365	1.43453	23.6254	23.6433	-0.135848	2.96982	22.9945	23.0276	-0.601381	4.10081
																											23.7919			23.5946				22.9837
																											22.0308			21.0988				22.1684
																										SLC6A15	21.7566	21.7471	-0.754866	21.0677	21.0973	-2.68184	3.80258	22.3034	22.2339	-1.39502	1.55849
																											21.4541			21.1253				22.23

## Sheet: B
Rep1																Rep2																Rep3
NAV3								SLC6A15								PPP1R12A								SYT1								PPP1R12A								SYT1
	79 TG4 WT			79 TG4 Mut					79 TG4 WT			79 TG4 Mut					79 TG4 WT			79 TG4 Mut					79 TG4 WT			79 TG4 Mut					79 TG4 WT			79 TG4 Mut					79 TG4 WT			79 TG4 Mut
	29.9731			29.2559					32.0699			32.1422					48.9373			30.8624					29.1227			31.7058					27.4358			27.9682					28.3465			28.4818
Inp	30.5313	30.4375		29.5161	29.4299			Inp	34.2505	33.0892		32.2258	32.8169			Inp	31.6084	37.1144		30.5496	32.1639			Inp	31.2763	30.5168		31.4302	32.2102			Inp	27.3485	27.4393		28.2131	28.1813			Inp	28.5891	28.6561		28.3754	28.6223
	30.8079			29.5176					32.9472			34.0826					30.7974			35.0798					31.1515			33.4947					27.5335			28.3626					29.0327			29.0096
	32.0297			30.5381					35.3897			34.6243					32.1912			32.7508					33.3667			33.2298					31.1549			30.4682					32.6158			30.351
IgG	32.4593	33.5175		31.9892	31.595			IgG		35.3897		30.2937	32.4343			IgG	33.0311	32.6112		33.1566	33.284			IgG		33.3667		32.182	32.6004			IgG	30.7827	31.3621		30.5366	30.8128			IgG	32.4377	32.1539		31.3638	30.8439
	36.0636			32.2577								32.3848					36.0414			33.9445					36.027			32.3894					32.1486			31.4337					31.4083			30.8167
	31.2944			31.1352					33.2184			30.4946					29.8771			32.4377					32.5517			34.5604					29.4907			30.457					31.187			32.0722
Pol2Ser5	32.2751	31.7984	3.29239	30.9252	31.2251	1.29228		Pol2Ser5	32.0943	32.9343	5.48448	33.1129	32.0004	1.35085		Pol2Ser5	30.498	30.3857	4.67662	33.1346	32.7862	1.41205		Pol2Ser5	32.2022	32.1507	2.32304	34.1016	34.331	0.301336		Pol2Ser5	30.3663	29.9286	2.70088	32.308	31.4434	0.645927		Pol2Ser5	31.7116	31.4163	1.66745	33.991	32.3646	0.348505
	31.8256			31.6148					33.4903			32.3937					30.782			30.9833					31.6983			36.8247					29.9289			31.5651					31.3503			31.0307
PAWR 2								PPP1R12A								NAV3								OSBPL8								NAV3								OSBPL8
	79 TG4 WT			79 TG4 Mut					79 TG4 WT			79 TG4 Mut					79 TG4 WT			79 TG4 Mut					79 TG4 WT			79 TG4 Mut					79 TG4 WT			79 TG4 Mut					79 TG4 WT			79 TG4 Mut
	27.8517			28.7869					28.1031			28.6837					35.3057			31.98					31.2415			30.8862					27.8797			27.5812					28.6985			28.1336
Inp	27.9569	27.7784		28.6099	28.7778			Inp	27.999	28.1173		28.5743	28.716			Inp	36.8221	35.4585		32.9455	33.4639			Inp	31.2368	31.1516		30.6372	30.8874			Inp	28.1656	28.0161		27.7256	27.7201			Inp	28.1273	28.3803		28.2144	28.2788
	27.5265			28.9368					28.2497			28.89					34.2478			35.4662					30.9765			31.1389					28.0028			27.8534					28.3149			28.4883
	31.219			33.0284					29.4939			29.433					35.7291			35.0462					32.7492			32.1588					31.4639			31.2768					32.1578			31.7809
IgG	30.628	30.6302		32.3276	32.2244			IgG	29.4347	29.4643		29.833	29.7019			IgG	38.6819	36.0941		33.4802	33.2468			IgG	32.5509	32.8882		31.4213	32.0538			IgG	31.6554	31.5618		30.802	31.4339			IgG	35.0535	32.7772		31.1905	31.6533
	30.0435			31.3173					28.6372			29.8397					33.8713			33.0135					33.3644			32.5814					31.566			32.2228					33.3965			31.5257
	29.5177			31.7518					28.8198			29.1551					36.5583			33.5075					32.6621			32.3727					30.4171			32.2238					31.253			31.5615
Pol2Ser5	29.6255	29.5991	2.04352	31.4552	31.6035	1.5379		Pol2Ser5	29.3656	29.1697	1.22661	29.9604	29.6875	1.01001		Pol2Ser5	34.0705	35.1947	1.86537	33.7938	33.6507	0.755857		Pol2Ser5	32.0013	32.3317	1.47067	32.5696	32.4711	0.748828		Pol2Ser5	30.6664	30.5908	1.9601	32.313	32.2198	0.579982		Pol2Ser5	31.4607	31.3568	2.67647	32.7782	32.325	0.627765
	29.6541			30.6613					29.3235			29.9471					34.9552			36.4299					34.8643			33.665					30.689			32.1227					30.3903			32.6352
SYT1								OSBPL8								METTL25								ATXN7L3B								METTL25								ATXN7L3B
	79 TG4 WT			79 TG4 Mut					79 TG4 WT			79 TG4 Mut					79 TG4 WT			79 TG4 Mut					79 TG4 WT			79 TG4 Mut					79 TG4 WT			79 TG4 Mut					79 TG4 WT			79 TG4 Mut
	29.259			26.0759					29.1249			29.5339					34.1112			34.6944					36.996			33.8373					34.2274			31.5081					29.7205			28.2758
Inp	29.18	29.1963		29.0291	28.0258			Inp	29.159	29.1912		29.1835	29.2879			Inp	33.5515	34.3138		34.59	34.4531			Inp	35.3676	36.8075		34.3296	34.0111			Inp	33.3653	33.7885		31.2397	31.5086			Inp	29.582	29.659		29.3446	28.8058
	29.1499			28.9726					29.2898			29.1464					35.2788			34.0748					38.059			33.8663					33.7729			31.778					29.6744			28.7969
	30.2981			30.1489					29.2861			29.7084					38.568			35.7409					37.3639			35.4697					37.0748			36.0576					32.2059			31.0511
IgG	30.1476	30.3266		29.5221	29.8148			IgG	29.2297	29.1997		29.9779	29.7045			IgG	36.4438	36.501		36.628	35.9347			IgG	42.24	40.007		35.6017	35.5357			IgG	36.4553	37.2038		37.2296	36.5553			IgG	32.1664	32.3109		31.2299	31.1405
	30.534			29.7735					29.0833			29.4273					36.5583			35.4351					40.4171			34.0807					38.0813			36.3788					32.5603			30.221
	30.4692			30.5293					30.8967			31.41					35.4598			36.4952					34.5034			36.3876					36.4107			37.1723					31.8812			33.0382
Pol2Ser5	30.1162	29.9659	1.28405	31.0094	30.7994	0.505358		Pol2Ser5	31.3839	30.7647	0.337977	31.3672	31.3886	0.311202		Pol2Ser5	35.719	35.4178	2.11885	34.8082	35.7878	1.10715		Pol2Ser5	36.5979	37.0434	7.80053	34.1941	33.8332	3.25453		Pol2Ser5	38.0099	36.6336	1.48469	35.5532	35.6602	1.85974		Pol2Ser5	31.9427	31.912	1.31851	35.7546	32.9537	0.284541
	29.3122			30.5895					30.6327			30.6217					35.0744			36.0601					37.4889			33.4723					36.8566			35.7672					31.1874			32.8693
METTL25								ATXN7L3B								SLC6A15								PAWR 2								SLC6A15								PAWR 2
	79 TG4 WT			79 TG4 Mut					79 TG4 WT			79 TG4 Mut					79 TG4 WT			79 TG4 Mut					79 TG4 WT			79 TG4 Mut					79 TG4 WT			79 TG4 Mut					79 TG4 WT			79 TG4 Mut
	32.7792			33.9666					29.4444			29.4963					36.1966			35.0373					30.0887			28.9739					30.3677			30.8629					25.71			26.6785
Inp	32.8761	33.0308		33.8286	33.9643			Inp	30.0147	29.7614		30.2885	29.9334			Inp	36.076	36.1032		34.3883	36.5439			Inp	30.1758	29.9972		29.2443	29.075			Inp	29.7878	30.0911		30.4996	30.9605			Inp	26.126	25.8897		26.2728	26.412
	33.437			34.0978					29.8251			30.0153					36.037			40.2061					29.7271			29.0068					30.1178			31.519					25.833			26.2846
	32.1347			34.4473					30.3549			30.9617					34.5471			35.3998					31.684			30.0025					32.7943			32.5073					30.1097			30.7946
IgG	34.0497	34.25		34.4904	34.7342			IgG	31.6039	31.4716		31.3931	30.9545			IgG	35.8639	34.9657		34.2981	34.353			IgG	32.0389	32.0997		30.7266	30.7621			IgG	33.2234	33.1368		31.7134	32.221			IgG	29.7357	29.6519		30.2689	30.3179
	34.4504			35.2649					32.4558			30.5086					34.486			34.4078					32.5761			31.5574					33.3928			32.4421					29.1103			29.89
	33.288			36.3062					32.2015			32.6936					33.6349			35.9337					30.1781			30.76					32.0811								28.7977			29.7664
Pol2Ser5	34.4154	33.9754	1.20972	34.9213	35.5312	0.575544		Pol2Ser5	32.3609	32.1117	0.641648	31.5431	32.1204	0.445674		Pol2Ser5	35.3287	34.6485	1.24589	33.9334	34.372	0.986902		Pol2Ser5	31.292	31.1806	1.8909	30.559	30.6958	1.04704		Pol2Ser5	32.2762	32.5244	1.52889	32.562	32.3921	0.88816		Pol2Ser5	28.5127	28.6192	2.04591	30.0514	29.9731	1.26994
	34.2227			35.3661					31.7728			32.1244					34.9819			34.8106					32.0716			30.7684					33.2157			32.2221					28.5471			30.1015
	79M TG4 WT			79M TG4 WT		79M TG4 Mut			79M TG4 Mut
PAWR (+0.21 Mb)	2.04352	1.8909	2.04591	1.99344	0.0725162	1.5379	1.04704	1.26994	1.28496	0.200675
PPP1R12A (+0.46 Mb)	1.22661	4.67662	2.70088	2.86804	1.41341	1.01001	1.41205	0.645927	1.02266	0.312898
SYT1 (-0.61 Mb)	1.28405	2.32304	1.66745	1.75818	0.428992	0.505358	0.301336	0.348505	0.385066	0.087212
NAV3 (-1.6Mb)	3.29239	1.86537	1.9601	2.37262	0.651526	1.29228	0.755857	0.579982	0.876041	0.302959
OSBPL8 (-2.9Mb)	0.337977	1.47067	2.67647	1.49504	0.954842	0.311202	0.748828	0.627765	0.562598	0.184507
METTL25 (+2.9Mb)	1.20972	2.11885	1.48469	1.60442	0.380685	0.575544	1.10715	1.85974	1.18081	0.526853
ATXN7L3B (-4.9Mb)	0.641648	7.80053	1.31851	3.25356	3.22704	0.445674	3.25453	0.284541	1.32825	1.36367
SLC6A15 (+5.4Mb)	5.48448	1.24589	1.52889	2.75309	1.93484	1.35085	0.986902	0.88816	1.0753	0.198966
PAWR (+0.21 Mb)	1.32877	1.80594	1.61103	1.58191	0.19589
PPP1R12A (+0.46 Mb)	1.21445	3.31192	4.18141	2.9026	1.24536
SYT1 (-0.61 Mb)	2.54086	7.70914	4.7846	5.01153	2.11604
NAV3 (-1.6Mb)	2.54773	2.46789	3.37959	2.7984	0.412249
OSBPL8 (-2.9Mb)	1.08604	1.96396	4.26349	2.43783	1.33977
METTL25 (+2.9Mb)	2.10187	1.91379	0.798331	1.60466	0.575309
ATXN7L3B (-4.9Mb)	1.43973	2.39682	4.63381	2.82345	1.33842
SLC6A15 (+5.4Mb)	4.06003	1.26242	1.72141	2.34795	1.22503

## Sheet: C
	ACTA2		PAWR		del cT	del del cT (over mut)				ACTA2		PPP1R12A		del cT	del del cT (over mut)		SYT1		del cT	del del cT (over mut)				ACTA2		NAV3		del cT	del del cT (over mut)
	28.8126		32.3757							28.8126		30.8592					33.0013							34.8485		28.4792
WT 1	28.7377	28.8053	32.7072	32.7078	3.90253	-1.87534	3.66888		WT 1	28.7377	28.8053	31.9143	31.2767	2.47143	-2.05731	4.16208	32.4798	32.9684	4.16306	-1.4762	2.78214		WT 1	33.497	34.0569	28.3215	28.5478	-5.50912	-1.98133	3.94856
	28.8657		33.0406							28.8657		31.0568					33.424							33.8253		28.8428
	28.6645		34.5965							28.6645		34.053					32.9832							33.3919		30.0628
Mut 1	28.5201	28.5556	33.9061	34.3335	5.77787				Mut 1	28.5201	28.5556	32.0962	33.0844	4.52873			35.7462	34.1949	5.63926				Mut 1	32.8927	32.7484	29.2497	29.2206	-3.52779
	28.4823		34.4979							28.4823		33.1039					33.8553							31.9607		28.3494
	30.3369		33.7685							31.9325		32.2789					42.001							31.9325		33.1666
WT 2	30.569	30.3926	33.8323	33.9325	3.53995	-1.69453	3.23672		WT 2	33.8817	33.7021	31.3038	31.8989	-1.80326	-2.19712	4.58562	32.8639	33.4224	-0.279686	-0.361069	1.28438		WT 2	33.8817	33.7021	34.174	33.7948	0.0926502	-1.52095	2.8698
	30.2718		34.1968							33.5226		32.1139					33.981							33.5226		34.0437
	28.5161		32.4985							33.0242		32.9209					33.4771							33.0242		34.1953
Mut 2	28.4514	28.5082	34.7133	33.7427	5.23449				Mut 2	33.4023	33.2131	34.0272	33.607	0.393859			33.675	33.2945	0.0813825				Mut 2	33.4023	33.2131	34.9989	34.8267	1.6136
	28.5572		34.0163							33.213		33.8728					32.7315							33.213		35.2861
	27.3536		32.39							30.8754		36.4053					38.2095							32.4981		37.8194
WT 3	27.2689	27.2897	32.5888	32.3349	5.04525	-1.22587	2.33896		WT 3	31.2713	31.2232	35.4638	35.9345	4.71135	-2.82775	7.09968		38.765	7.54185	-1.41577	2.66802		WT 3	32.4239	32.6519	37.9872	37.9033	5.25143	-2.54238	5.82551
	27.2464		32.026							31.5228							39.3205							33.0336		41.0092
	28.466		35.5987							28.5502		36.1084					36.5876							29.8188		39.2315
Mut 3	29.0248	28.8499	34.6432	35.121	6.27112				Mut 3	27.3319	28.1559		35.695	7.5391				37.1135	8.95762				Mut 3	29.6302	29.651	37.5096	37.4448	7.79382
	29.0588		40.6208							28.5855		35.2816					37.6394							29.504		37.3801

## Sheet: D
	Rep1								Rep2								Rep3
R1	79 LHA Cr 100 1								79 LHA Cr 100 1							R1	79 LHA Cr 100 1							R2	79 LHA Cr 200 2
		79 TG4 WT			79 TG4 Mut					79 TG4 WT			79 TG4 Mut					79 TG4 WT			79 TG4 Mut					79 TG4 WT			79 TG4 Mut
		29.4144			29.4601					29.6066			29.4349					29.6066			29.1896					31.6559			30.9925
	Inp	29.4914	29.5212		30.6427	30.0594			Inp	29.974	29.6706		29.6005	29.5593			Inp	29.974	29.6706		29.128	29.1633			Inp	32.3314	31.8867		32.0882	31.4704
		29.6578			30.0754					29.431			29.6424					29.431			29.1723					31.6728			31.3304
		31.3759			31.2329					29.8945			31.1362					29.8945			29.7658					32.1938			32.1281
	IgG	31.4314	31.4549		31.4918	31.3391			IgG	29.8567	29.8756		30.7494	30.9518			IgG	29.8567	29.8756		29.8635	29.8639			IgG	31.5652	31.9934		32.6464	32.456
		31.5574			31.2926					31.9984			30.9699					31.9984			29.9624					32.2213			32.5936
		31.3319			31.6738					29.3787			31.3493					29.5863			29.7048					32.0483			32.3565
	p300	31.3613	31.5631	0.92776	31.2393	31.4193	0.945948		p300	30.1852	29.8341	1.0292	31.3878	31.2634	0.805757		p300 rep 3	29.8806	29.6051	1.20628	30.7214	30.2155	0.783744		p300 rep 3	32.1785	32.0865	0.937527	32.018	32.2406	1.16108
		31.9959			31.3447					29.9383			31.0532					29.3483			30.2202					32.0328			32.3471
R2	79 LHA Cr 200 2								79 LHA Cr 200 2
		79 TG4 WT			79 TG4 Mut					79 TG4 WT			79 TG4 Mut			R3	79 RHA Cr 100 1							R4	79 RHA WT 250
		32.6648			30.1949					31.6559			30.4134					79 TG4 WT			79 TG4 Mut					79 TG4 WT			79 TG4 Mut
	Inp	33.2914	32.6801		32.5045	31.3281			Inp	32.3314	31.8867		31.0522	30.825				34.2913			35.7104					35.4187			36.5705
		32.0841			31.285					31.6728			31.0094				Inp	33.7404	34.2823		36.0267	35.3827			Inp	35.0109	35.1352		37.4531	36.8553
		32.8597			33.2797					32.1938			31.8976					34.8153			34.411					34.976			36.5422
	IgG	32.6482	32.6584		32.3517	32.6656			IgG	31.5652	31.9934		32.7473	32.3755				37.0018			36.9897					37.1594			36.7021
		32.4672			32.3654					32.2213			32.4817				IgG	36.2077	36.4251		35.814	35.7551			IgG	36.3346	36.6654		37.751	37.3378
		33.1921			32.3656					31.586			31.8498					36.0657			34.4617					36.5022			37.5604
	p300	33.4577	33.2473	0.664834	32.9969	32.6478	1.01241		p300	32.203	31.9748	1.01298	32.5516	32.6135	0.847972			35.2146			36.1184					37.6074			37.7633
		33.092			32.5809					32.1355			33.439				p300 rep 3	35.2144	35.2013	2.33549	36.2991	35.8425	0.941235		p300 rep 3	35.792	36.8034	0.908736	37.8784	37.8209	0.715473
R3	79 RHA Cr 100 1								79 RHA Cr 100 1									35.175			35.11					37.0109			39.5209
		79 TG4 WT			79 TG4 Mut					79 TG4 WT			79 TG4 Mut
		33.4263			34.8191					34.2913			34.0646
	Inp	31.4077	32.9541		36.3549	35.4461			Inp	33.7404	34.2823		35.1634	34.6353
		34.0284			35.1644					34.8153			34.678
		40.0899			40.6737					37.0018			36.3765
	IgG	38.5206	38.8021		40.1447	40.0258			IgG	36.2077	36.4251		38.2932	37.3752
		37.7959			39.2591					36.0657			37.4559
		36.6782			38.2278					33.9218			38.1015
	p300	38.4589	36.9443	3.62461	40.8061	39.517	1.4229		p300	35.9806	34.895	2.88809	36.435	36.3513	2.03332
		35.6957								34.7824			36.2677
R4	79 RHA WT 250								79 RHA WT 250
		79 TG4 WT			79 TG4 Mut					79 TG4 WT			79 TG4 Mut
		34.9859			36.8828					35.4187			35.6958
	Inp	35.5154	35.2148		36.5627	36.7827			Inp	35.0109	35.1352		35.7758	35.4991
		35.1429			36.9025					34.976			35.0256
		40.2358			40.1547					37.1594			43.8523
	IgG		39.8959		41.7547	40.9547			IgG	36.3346	36.6654		38.7021	38.5671
		39.556								36.5022			38.4321
		39.3894			41.6502					36.0467			38.487
	p300	36.1976	39.4631	1.3498	41.3355	41.4187	0.724967		p300	36.9991	36.5208	1.10543	37.8008	38.1542	1.33132
		39.5369			41.2705					36.5165			38.1748
	Compilation
			79 TG4 WT			Avg		79 TG4 Mut			Avg
	79 LHA Cr 100 1	R1	0.92776	1.0292	1.20628	0.978482	0.0507216	0.945948	0.805757	0.783744	0.84515	0.0718396
	79 LHA Cr 200 2	R2	0.664834	1.01298	0.937527	0.838906	0.174072	1.01241	0.847972	1.16108	1.00716	0.12788
	79 RHA Cr 100 1	R3	3.92107	2.88809	2.33549	3.40458	0.516491	1.4229	2.03332	0.941235	1.46582	0.446874
	79 RHA WT 250	R4	1.3498	1.10543	0.908736	1.22761	0.122185	0.724967	1.33132	0.715473	0.923921	0.288103
			WT/Mut
		R1	0.980773	1.27731	1.53912
		R2	0.656682	1.19459	0.80746
		R3	2.75568	1.42038	2.48131
		R4	1.86187	0.830321	1.27012

## Sheet: E
	Rep1								Rep2								Rep3
R1	79 LHA Cr 100 1								79 LHA Cr 100 1								79 LHA Cr 100 1
		79 TG4 WT			79 TG4 Mut					79 TG4 WT			79 TG4 Mut					79 TG4 WT			79 TG4 Mut
		29.4144			29.4601					29.3638			29.4349					28.5288			29.1987
	Inp	29.4914	29.5212		30.6427	30.0594			Inp	29.2328	29.3346		29.6005	29.5593			Inp	29.2867	28.7801		29.1746	29.1485
		29.6578			30.0754					29.4073			29.6424					28.5246			29.072
		31.3759			31.2329					30.727			31.1362					29.3644			29.1396
	IgG	31.4314	31.4549		31.4918	31.3391			IgG	30.8474	30.8495		30.7494	30.9518			IgG	29.0651	29.286		29.2432	29.0792
		31.5574			31.2926					30.974			30.9699					29.4286			28.8547
		30.9719			31.0552					29.3577			30.9044					29.2294			29.1498
	Ac CBP p300	31.2879	31.1748	1.21429	31.4831	31.3475	0.99419		Ac CBP p300	29.3732	29.3641	2.79979	30.7278	30.9922	0.972392		Ac CBP p300	28.8603	29.0176	1.20451	29.2769	29.1617	0.944424
		31.2645			31.5042					29.3615			31.3445					28.9631			29.0582
R2	79 LHA Cr 200 2								79 LHA Cr 200 2								79 LHA Cr 200 2
		79 TG4 WT			79 TG4 Mut					79 TG4 WT			79 TG4 Mut					79 TG4 WT			79 TG4 Mut
		32.6648			30.1949					31.2992			30.4134					31.9844			30.974
	Inp	33.2914	32.6801		32.5045	31.3281			Inp	31.4915	31.541		31.0522	30.825			Inp	31.5531	31.9202		31.5207	31.2623
		32.0841			31.285					31.8323			31.0094					32.2233			31.2921
		32.8597			33.2797					32.8421			31.8976					32.0729			31.5424
	IgG	32.6482	32.6584		32.3517	32.6656			IgG	32.9436	33.0021		32.7473	32.3755			IgG	31.933	31.8223		31.8656	31.7772
		32.4672			32.3654					33.2204			32.4817					31.4611			31.9235
		32.1522			32.6875					31.1932			31.4865					31.2942			31.3174
	Ac CBP p300	33.0832	32.7599	0.932018	32.9847	32.5817	1.0599		Ac CBP p300	32.9121	32.9504	1.03645	31.9488	31.7177	1.57776		Ac CBP p300	31.7117	31.6353	1.13838	31.4399	31.3412	1.35283
		33.0444			32.0729					32.9887			33.1417					31.9001			31.2663
R3	79 RHA Cr 100 1								79 RHA Cr 100 1								79 RHA Cr 100 1
		79 TG4 WT			79 TG4 Mut					79 TG4 WT			79 TG4 Mut					79 TG4 WT			79 TG4 Mut
		33.4263			34.8191					33.3177			34.0646					34.3604			35.253
	Inp	31.4077	32.9541		36.3549	35.4461			Inp	33.3167	33.4887		35.1634	34.6353			Inp	35.0142	34.5362		34.6984	35.1632
		34.0284			35.1644					33.8317			34.678					34.2341			35.5382
		40.0899			40.6737					36.3187			36.3765					35.9929			36.2912
	IgG	38.5206	38.1582		40.1447	40.0258			IgG	36.6687	36.4937		38.2932	37.3752			IgG	35.4685	35.9207		35.3767	35.5163
		37.7959			39.2591					37.758			37.4559					36.3007			34.8811
		37.3556			37.9079					32.7146			34.8748					35.3968			35.2164
	Ac CBP p300	36.5715	37.4222	1.66554	40.046	39.9906	1.02468		Ac CBP p300	33.3852	33.3267	8.98201	34.8974	34.76	6.12707		Ac CBP p300	35.0422	34.9834	1.91491	35.2367	35.1585	1.28151
		38.3396			39.9353					33.8803			34.5078					34.5113			35.0224
R4	79 RHA WT 250								79 RHA WT 250								79 RHA WT 250
		79 TG4 WT			79 TG4 Mut					79 TG4 WT			79 TG4 Mut					79 TG4 WT			79 TG4 Mut
		34.9859			36.8828					33.4117			35.6958					35.4825			38.152
	Inp	35.5154	35.2148		36.5627	36.7827			Inp	33.8893	33.7133		35.7758	35.4991			Inp	35.4552	35.1504		39.4232	38.3233
		35.1429			36.9025					33.8388			35.0256					34.5135			37.3948
		40.2358								36.5269			43.8523					37.0069			37.1702
	IgG		39.8959		40.9547	40.9547			IgG	37.2935	36.4632		38.7021	38.5671			IgG	37.2399	37.1234		40.0245	37.5676
		39.556								35.569			38.4321					36.0683			37.9649
		38.4023			39.4377					33.4904			37.1912					36.5209			37.4132
	Ac CBP p300	37.2508	37.9041	3.97734	41.0537	40.2457	1.63467		Ac CBP p300	34.264	33.8429	6.14874	38.1156	37.6991	1.82502		Ac CBP p300	34.8553	35.5594	2.95676	38.2494	37.8313	0.832913
		38.0591			44.4314					33.7743			37.7906					35.3019			35.1655
	Compilation
			79 TG4 WT			Avg		79 TG4 Mut			Avg
		NR4A3	2.21821	1.95423	4.26643	2.81296	1.0334	2.21302	11.917	3.62812	5.91939	4.28013
	79 LHA Cr 100 1	R1	1.21429	2.79979	1.20451	1.73953	0.749727	0.99419	0.972392	0.944424	0.970335	0.0203692
	79 LHA Cr 200 2	R2	0.932018	1.03645	1.13838	1.03562	0.0842498	1.0599	1.57776	1.35283	1.33016	0.212021
	79 RHA Cr 100 1	R3	1.66554	8.98201	1.91491	4.18748	3.39177	1.02468	6.12707	1.28151	2.81109	2.3471
	79 RHA WT 250	R4	3.97734	6.14874	2.95676	4.36095	1.33105	1.63467	1.82502	0.832913	1.43087	0.4299
			WT/Mut
		R1	1.22139	2.87928	1.2754
		R2	0.879344	0.656914	0.841481
		R3	1.62542	1.46596	1.49425
		R4	2.43311	3.36914	3.5499
