# Supplementary material for: Artificially inserted strong promoter containing multiple G-quadruplexes induces long-range chromatin modification
Source: eLife. 2024 Aug 19;13:RP96216. doi: 10.7554/eLife.96216 (PMC11333042; doi:10.7554/eLife.96216)
Supplement: Figure 4—figure supplement 1—source data 1. [file elife-96216-fig4-figsupp1-data1.xlsx]

## Sheet: Sheet1
			Cntl			TERT LNA rep 1				TERT LNA rep 2				TERT LNA rep 3
			15.1765			15.1921				14.9208				14.7511
		GAPDH	15.4033	15.272		15.1385	15.0856			14.9978	14.9491			14.6132	14.8049
			15.2364			14.9261				14.9288				15.0504
			25.2821			24.6901				25.1762				24.6332
		PAWR	25.058	25.1646	9.89255	24.4799	24.7864	9.70082	1.14213	25.0377	25.0798	10.1307	0.847837	24.9591	24.8146	9.72908	1.11997
			25.1536			25.1892				25.0256				24.8517
			23.9108			23.8529				23.6871				24.0087
		PPP1R12A	24.1431	23.9323	8.6603	23.5499	23.7398	8.65422	1.00423	23.5207	23.5245	8.43891	1.16586	23.6035	23.8351	8.74952	0.940036
			23.7432			23.8165				23.3656				23.893
			34.2838			33.3501				32.6644				34.6878
		NAV3	35.3093	34.7965	19.5245	35.4237	33.6588	18.5733	1.93353	33.8974	33.9181	18.8325	1.6155	35.148	34.9179	19.8323	0.807864
			36.8252			33.9675				33.9388				33.4208
			26.6108			25.9712				24.6386				24.8838
		SLC6A15	25.8192	25.6646	10.3926	25.1022	25.1818	10.0962	1.22807	25.1938	24.8886	9.80299	1.50482	24.5425	24.7659	9.68035	1.63833
			25.51			24.4718				24.8333				24.8715
		PAWR	1.14213	0.847837	1.11997
		PPP1R12A	1.00423	1.16586	0.940036
		NAV3	1.93353	1.6155	0.807864
		SLC6A15	1.22807	1.50482	1.63833
