# Supplementary material for: Artificially inserted strong promoter containing multiple G-quadruplexes induces long-range chromatin modification
Source: eLife. 2024 Aug 19;13:RP96216. doi: 10.7554/eLife.96216 (PMC11333042; doi:10.7554/eLife.96216)
Supplement: Figure 4—source data 1. [file elife-96216-fig4-data1.xlsx]

## Sheet: B
Rep1									Rep2									Rep3
	Cntl			TERT LNA 100 hours						Cntl			TERT LNA 100 hours						Cntl			TERT LNA 100 hours
	16.1241			16.0985						17.2584			16.5517						14.4846			14.6682
GAPDH	16.1558	16.138		16.0201	16.0487				GAPDH	17.0567	17.1625		16.3665	16.4444				GAPDH	14.5528	14.5052		14.6602	14.6817
	16.1341			16.0274						17.1725			16.4148						14.4782			14.7168
	24.3705			24.0663						24.5415			23.7131						23.0383			22.6837
PAWR (+0.21 Mb)	24.2388	24.274	8.13603	23.9186	24.002	7.95336	1.13498		PAWR (+0.21 Mb)	24.3473	24.4375	7.27492	23.7678	23.7216	7.27725	0.998387		PAWR (+0.21 Mb)	23.0045	22.9966	8.4914	22.7169	22.7105	8.02881	1.37801
	24.2128			24.0211						24.4236			23.684						22.9469			22.731
	24.5527			24.6045						24.6499			24.5625						22.983			23.4811
PPP1R12A (+0.46 Mb)	24.4246	24.41	8.27196	24.602	24.617	8.5683	0.814317		PPP1R12A (+0.46 Mb)	24.7445	24.6509	7.48835	24.4813	24.527	8.08261	0.662384		PPP1R12A (+0.46 Mb)	22.9294	22.9672	8.46202	23.483	23.4685	8.78682	0.798407
	24.2526			24.6444						24.5583			24.5371						22.9892			23.4415
	37.1197			35.4142						34.8474			35.3227						35.0829			39.0462
NAV3	34.8565	34.8119	18.6739	34.131	35.4235	19.3748	0.615201		NAV3	35.1298	34.9347	17.7722	36.5246	35.1515	18.7071	0.523078		NAV3	32.348	33.1973	18.6921	34.6244	35.0744	20.3927	0.307659
	34.7674			35.4327						34.8271			34.9802						32.1609			35.5244
	28.4878			27.5304						27.1367			26.5802						25.8029			25.2118
SLC6A15	28.0957	28.2315	12.0935	27.2635	27.3392	11.2906	1.74461		SLC6A15	27.6844	27.4707	10.3082	26.6652	26.733	10.2886	1.01366		SLC6A15	26.0637	26.1084	11.6032	25.3653	25.2747	10.593	2.01425
	28.1109			27.2238						27.5912			26.9536						26.4586			25.247
Compilation
	Rep 1	Rep 2	Rep 3
PAWR (+0.21 Mb)	1.13498	0.998387	1.37801
PPP1R12A (+0.46 Mb)	0.814317	0.662384	0.798407
NAV3 (-1.6Mb)	0.615201	0.523078	0.307659
SLC6A15 (+5.4Mb)	1.74461	1.01	2.01425

## Sheet: C&D
	Rep1												Rep2												Rep3
R1	79 LHA Cr 100 1												79 LHA Cr 100 1												79 LHA Cr 100 1
		Control						LNA						Control						LNA						Control						LNA
		25.9583						26.0904						30.1583						28.1904						28.0357						27.4506
	Inp	25.9467	25.9846	19.3406			Inp	26.4132	26.2317	19.5877			Inp	30.3467	30.1846	23.5406			Inp	28.6132	28.3317	21.6877			Inp	27.6315	27.8109	21.1669			Inp	27.1936	27.1763	20.5323
		26.049						26.1916						30.049						28.1916						27.7654						26.8847
		26.168						26.0518						28.2236						28.6458						28.4506						27.0357
	H3	26.191	26.138	0.899037			H3	26.0667	26.0891	1.1038			H3	27.7546	27.999	4.5489			H3	28.3851	28.5782	0.842867			H3	28.1936	28.1763	0.776176			H3	26.6315	26.8109	1.28811
		26.0551						26.1488						28.0187						28.7036						27.8847						26.7654
		25.0271						25.2322						27.6443						28.2951						27.4019						26.3758
	H3K27Ac	25.0693	25.0151	1.95797	2.17785		H3K27Ac	25.2999	25.277	1.93796	1.75571		H3K27Ac	27.6283	27.5834	6.06748	1.33383		H3K27Ac	28.7857	28.5404	0.865228	1.02653		H3K27Ac	27.6128	27.5459	1.20147	1.54793		H3K27Ac	30.5316	26.3358	1.79041	1.38995
		24.949						25.299						27.4777						30.0983						27.6232						26.2959
		25.1102						25.4156						26.9622						28.1696						27.1001						26.6024
	H3K4Me1	25.2748	25.2327	1.68392	1.87303		H3K4Me1	25.8052	25.7104	1.43508	1.30013		H3K4Me1	27.2602	27.1483	8.20344	1.80339		H3K4Me1	27.4536	27.7327	1.51453	1.79688		H3K4Me1	27.1192	27.1461	1.58519	2.04231		H3K4Me1	26.633	26.4406	1.66506	1.29264
		25.3131						25.9105						27.2224						27.5749						27.2189						26.0863
R2	79 LHA Cr 200 2												79 LHA Cr 200 2												79 LHA Cr 200 2
		Control						LNA						Control						LNA						Control						LNA
		29.8518						29.8749						31.9518						31.9749						31.4839						32.2233
	Inp	30.325	30.0153	23.3713			Inp	30.4298	30.1353	23.4913			Inp	32.525	32.1153	25.4713			Inp	32.6298	32.2353	25.5913			Inp	32.0972	32.3476	25.7036			Inp	32.2253	32.3372	25.6932
		29.8691						30.1012						31.8691						32.1012						33.4618						32.5631
		30.3367						29.9406						31.1223						30.7367						32.8684						32.4957
	H3	30.1318	30.3266	0.805811			H3	29.7681	29.9191	1.16156			H3	31.4057	31.5056	1.52575			H3	31.1934	31.0903	2.21121			H3	33.5351	33.0037	0.634534			H3	31.9083	32.0293	1.23782
		30.5113						30.0486						31.9888						31.3409						32.6078						31.6838
		29.0818						30.0949						31.9571						30.245						33.2233						31.4839
	H3K27Ac	27.2014	29.1281	1.84942	2.2951		H3K27Ac	30.3181	30.2674	0.912429	0.785522		H3K27Ac	32.5883	32.2463	0.91307	0.598441		H3K27Ac	31.8984	31.0811	2.22545	1.00644		H3K27Ac	33.2253	33.3372	0.503578	0.793619		H3K27Ac	31.0972	31.681	1.57581	1.27306
		29.1743						30.3891						32.1936						31.0998						33.5631						32.4618
		29.5886						29.7575						31.0715						30.2495						30.9114						30.1085
	H3K4Me1	30.1963	29.8409	1.12836	1.40028		H3K4Me1	30.3663	30.2423	0.928426	0.799294		H3K4Me1	31.5768	31.1951	1.89219	1.24017		H3K4Me1	30.7832	30.2966	3.83329	1.73357		H3K4Me1	34.1693	32.6263	0.824296	1.29906		H3K4Me1	30.7821	30.8837	2.73841	2.21229
		29.7377						30.6032						30.9369						29.8571						32.7981						31.7606
R3	79 RHA Cr 100 1												79 RHA Cr 100 1												79 RHA Cr 100 1
		Control						LNA						Control						LNA						Control						LNA
		30.227						30.5333						30.227						32.6333						32.4278						30.0864
	Inp	31.7095	30.8959	24.2519			Inp	30.7951	30.5815	23.9375			Inp	31.7095	30.8959	24.2519			Inp	31.9951	32.3482	25.7042			Inp	30.7901	31.2486	24.6046			Inp	30.5639	30.221	23.577
		30.7511						30.4161						30.7511						32.4161						30.5278						30.0128
		31.6701						29.5698						31.0325						31.6922						32.2716						30.1325
	H3	31.9787	31.7918	0.537359			H3	29.1423	29.3005	2.4299			H3	30.9448	30.8626	1.02323			H3	32.3398	31.9388	1.32795			H3	31.1204	32.4284	0.441348			H3	30.0055	30.069	1.11101
		31.7265						29.1893						30.6105						31.7845						32.5852						32.0944
		29.2578						30.3206						30.3293						31.584						31.0864						30.9278
	H3K27Ac	29.7273	29.315	2.99123	5.56654		H3K27Ac	31.3752	30.2215	1.28333	0.528139		H3K27Ac	31.4569	30.2971	1.51426	1.47988		H3K27Ac	32.2845	31.9539	1.31419	0.989638		H3K27Ac	31.5639	31.221	1.01917	2.30921		H3K27Ac	29.2901	29.159	2.08772	1.87912
		28.9599						30.1223						30.2649						31.993						31.0128						29.0278
		30.1813						30.113						29.9485						30.9048						30.7674						28.7408
	H3K4Me1	31.5669	30.257	1.557	2.8975		H3K4Me1	29.1056	29.9214	1.58005	0.65025		H3K4Me1	30.1795	29.8805	2.02117	1.97528		H3K4Me1	29.7183	30.9169	2.6966	2.03066		H3K4Me1	30.6168	30.9184	1.25703	2.84816		H3K4Me1	28.9747	28.8577	2.5725	2.31546
		30.3326						30.5456						29.5136						30.929						31.371						30.1322
R4	79 RHA WT 250												79 RHA WT 250												79 RHA WT 250
		Control						LNA						Control						LNA						Control						LNA
		33.5955						34.8214						34.5955						34.8214						30.2373						29.2234
	Inp	33.9909	33.9543	27.3103			Inp	35.3846	35.3045	28.6605			Inp	33.9909	34.2876	27.6436			Inp	35.3046	34.9445	28.3005			Inp	30.3882	30.2723	23.6283			Inp	29.4799	29.3513	22.7073
		34.2765						35.7075						34.2765						34.7075						30.1913						29.3507
		34.2669						34.3236						34.1724						35.19						30.4187						29.4427
	H3	34.6328	34.5331	0.669456			H3	34.893	34.7401	1.47868			H3	34.1845	34.3345	0.967972			H3	36.183	35.5706	0.647875			H3	30.3823	30.6027	0.795194			H3	30.0935	29.7851	0.740285
		34.6997						35.0036						34.6465						35.3387						31.0072						29.8189
		33.0956						34.0789						33.479						35.473						30.0234						29.1373
	H3K27Ac	33.8908	33.538	1.33442	1.99328		H3K27Ac	34.3873	34.2331	2.10126	1.42104		H3K27Ac	34.1288	33.7204	1.48157	1.53059		H3K27Ac	36.2488	35.9177	0.509329	0.786153		H3K27Ac	30.2799	30.1513	1.08731	1.36736		H3K27Ac	29.2882	29.1723	1.13205	1.52921
		33.6275						33.0699						33.5533						36.0313						30.1507						29.0913
		32.619						33.6751						33.5485						35.0856						29.6873						29.1123
	H3K4Me1	33.2309	32.9861	1.95617	2.92202		H3K4Me1	33.4872	33.8441	2.75163	1.86087		H3K4Me1	33.7785	33.6795	1.52416	1.5746		H3K4Me1	35.7742	35.519	0.671458	1.0364		H3K4Me1	30.2184	29.7475	1.43851	1.809		H3K4Me1	29.1935	29.0784	1.20815	1.632
		33.1085						34.37						33.7114						35.6972						29.3369						28.9295
Compilation
H3K27Ac
			Control			LNA
79 LHA Cr 100 1		R1	2.17785	1.33383	1.54793	1.75571	1.02653	1.38995	0.80617	0.769608	0.89794
79 LHA Cr 200 2		R2	2.2951	0.598441	0.793619	0.785522	1.00644	1.27306	0.34226	1.68177	1.60412
79 RHA Cr 100 1		R3	5.56654	1.47988	2.30921	0.528139	0.989638	1.87912	0.0948774	0.66873	0.813749
79 RHA WT 250		R4	1.99328	1.53059	1.36736	1.42104	0.786153	1.52921	0.712912	0.513627	1.11837
H3K4Me1
			Control			LNA
79 LHA Cr 100 1		R1	1.87303	1.80339	2.04231	1.30013	1.79688	1.29264	0.69413	0.996391	0.63293
79 LHA Cr 200 2		R2	1.40028	1.24017	1.29906	0.799294	1.73357	2.21229	0.570812	1.39785	1.703
79 RHA Cr 100 1		R3	2.8975	1.97528	2.84816	0.65025	2.03066	2.31546	0.224418	1.02804	0.812965
79 RHA WT 250		R4	2.92202	1.5746	1.809	1.86087	1.0364	1.632	0.636842	0.658202	0.902156
