# Supplementary material for: Artificially inserted strong promoter containing multiple G-quadruplexes induces long-range chromatin modification
Source: eLife. 2024 Aug 19;13:RP96216. doi: 10.7554/eLife.96216 (PMC11333042; doi:10.7554/eLife.96216)
Supplement: Figure 6—source data 1. [file elife-96216-fig6-data1.xlsx]

## Sheet: Fig 6D- WT.all.windows
chr12	79772423	79772433	5
chr12	79772433	79772443	2
chr12	79772443	79772453	2
chr12	79772453	79772463	5
chr12	79772463	79772473	2
chr12	79772473	79772483	2
chr12	79772483	79772493	2
chr12	79772493	79772503	4
chr12	79772503	79772513	4
chr12	79772513	79772523	2
chr12	79772523	79772533	2
chr12	79772533	79772543	0
chr12	79772543	79772553	0
chr12	79772553	79772563	1
chr12	79772563	79772573	2
chr12	79772573	79772583	5
chr12	79772583	79772593	5
chr12	79772593	79772603	3
chr12	79772603	79772613	4
chr12	79772613	79772623	1
chr12	79772623	79772633	1
chr12	79772633	79772643	7
chr12	79772643	79772653	2
chr12	79772653	79772663	6
chr12	79772663	79772673	4
chr12	79772673	79772683	0
chr12	79772683	79772693	6
chr12	79772693	79772703	5
chr12	79772703	79772713	3
chr12	79772713	79772723	5
chr12	79772723	79772733	1
chr12	79772733	79772743	4
chr12	79772743	79772753	4
chr12	79772753	79772763	4
chr12	79772763	79772773	1
chr12	79772773	79772783	1
chr12	79772783	79772793	0
chr12	79772793	79772803	0
chr12	79772803	79772813	0
chr12	79772813	79772823	2
chr12	79772823	79772833	2
chr12	79772833	79772843	2
chr12	79772843	79772853	3
chr12	79772853	79772863	1
chr12	79772863	79772873	0
chr12	79772873	79772883	2
chr12	79772883	79772893	2
chr12	79772893	79772903	5
chr12	79772903	79772913	1
chr12	79772913	79772923	1
chr12	79772923	79772933	4
chr12	79772933	79772943	2
chr12	79772943	79772953	2
chr12	79772953	79772963	3
chr12	79772963	79772973	4
chr12	79772973	79772983	4
chr12	79772983	79772993	8
chr12	79772993	79773003	9
chr12	79773003	79773013	3
chr12	79773013	79773023	5
chr12	79773023	79773033	4
chr12	79773033	79773043	4
chr12	79773043	79773053	6
chr12	79773053	79773063	4
chr12	79773063	79773073	5
chr12	79773073	79773083	0
chr12	79773083	79773093	5
chr12	79773093	79773103	4
chr12	79773103	79773113	4
chr12	79773113	79773123	8
chr12	79773123	79773133	3
chr12	79773133	79773143	5
chr12	79773143	79773153	3
chr12	79773153	79773163	4
chr12	79773163	79773173	5
chr12	79773173	79773183	11
chr12	79773183	79773193	0
chr12	79773193	79773203	7
chr12	79773203	79773213	8
chr12	79773213	79773223	5
chr12	79773223	79773233	3
chr12	79773233	79773243	5
chr12	79773243	79773253	4
chr12	79773253	79773263	3
chr12	79773263	79773273	3
chr12	79773273	79773283	5
chr12	79773283	79773293	5
chr12	79773293	79773303	10
chr12	79773303	79773313	3
chr12	79773313	79773323	5
chr12	79773323	79773333	10
chr12	79773333	79773343	8
chr12	79773343	79773353	5
chr12	79773353	79773363	6
chr12	79773363	79773373	4
chr12	79773373	79773383	5
chr12	79773383	79773393	8
chr12	79773393	79773403	12
chr12	79773403	79773413	5
chr12	79773413	79773423	5
chr12	79773423	79773433	7
chr12	79773433	79773443	9
chr12	79773443	79773453	11
chr12	79773453	79773463	7
chr12	79773463	79773473	5
chr12	79773473	79773483	4
chr12	79773483	79773493	9
chr12	79773493	79773503	4
chr12	79773503	79773513	5
chr12	79773513	79773523	4
chr12	79773523	79773533	3
chr12	79773533	79773543	8
chr12	79773543	79773553	9
chr12	79773553	79773563	5
chr12	79773563	79773573	4
chr12	79773573	79773583	5
chr12	79773583	79773593	5
chr12	79773593	79773603	1
chr12	79773603	79773613	3
chr12	79773613	79773623	2
chr12	79773623	79773633	10
chr12	79773633	79773643	2
chr12	79773643	79773653	5
chr12	79773653	79773663	1
chr12	79773663	79773673	6
chr12	79773673	79773683	3
chr12	79773683	79773693	4
chr12	79773693	79773703	1
chr12	79773703	79773713	10
chr12	79773713	79773723	4
chr12	79773723	79773733	5
chr12	79773733	79773743	4
chr12	79773743	79773753	5
chr12	79773753	79773763	2
chr12	79773763	79773773	1
chr12	79773773	79773783	2
chr12	79773783	79773793	6
chr12	79773793	79773803	2
chr12	79773803	79773813	3
chr12	79773813	79773823	5
chr12	79773823	79773833	6
chr12	79773833	79773843	7
chr12	79773843	79773853	4
chr12	79773853	79773863	1
chr12	79773863	79773873	2
chr12	79773873	79773883	3
chr12	79773883	79773893	2
chr12	79773893	79773903	10
chr12	79773903	79773913	3
chr12	79773913	79773923	0
chr12	79773923	79773933	2
chr12	79773933	79773943	0
chr12	79773943	79773953	0
chr12	79773953	79773963	5
chr12	79773963	79773973	1
chr12	79773973	79773983	1
chr12	79773983	79773993	4
chr12	79773993	79774003	3
chr12	79774003	79774013	2
chr12	79774013	79774023	4
chr12	79774023	79774033	6
chr12	79774033	79774043	4
chr12	79774043	79774053	9
chr12	79774053	79774063	7
chr12	79774063	79774073	8
chr12	79774073	79774083	10
chr12	79774083	79774093	3
chr12	79774093	79774103	8
chr12	79774103	79774113	4
chr12	79774113	79774123	8
chr12	79774123	79774133	10
chr12	79774133	79774143	11
chr12	79774143	79774153	4
chr12	79774153	79774163	14
chr12	79774163	79774173	3
chr12	79774173	79774183	4
chr12	79774183	79774193	11
chr12	79774193	79774203	10
chr12	79774203	79774213	6
chr12	79774213	79774223	5
chr12	79774223	79774233	9
chr12	79774233	79774243	3
chr12	79774243	79774253	2
chr12	79774253	79774263	27
chr12	79774263	79774273	5
chr12	79774273	79774283	6
chr12	79774283	79774293	8
chr12	79774293	79774303	5
chr12	79774303	79774313	13
chr12	79774313	79774323	10
chr12	79774323	79774333	4
chr12	79774333	79774343	7
chr12	79774343	79774353	3
chr12	79774353	79774363	6
chr12	79774363	79774373	5
chr12	79774373	79774383	4
chr12	79774383	79774393	6
chr12	79774393	79774403	4
chr12	79774403	79774413	1
chr12	79774413	79774423	12
chr12	79774423	79774433	9
chr12	79774433	79774443	3
chr12	79774443	79774453	6
chr12	79774453	79774463	10
chr12	79774463	79774473	6
chr12	79774473	79774483	8
chr12	79774483	79774493	6
chr12	79774493	79774503	5
chr12	79774503	79774513	4
chr12	79774513	79774523	14
chr12	79774523	79774533	4
chr12	79774533	79774543	13
chr12	79774543	79774553	3
chr12	79774553	79774563	6
chr12	79774563	79774573	4
chr12	79774573	79774583	1
chr12	79774583	79774593	7
chr12	79774593	79774603	4
chr12	79774603	79774613	6
chr12	79774613	79774623	4
chr12	79774623	79774633	2
chr12	79774633	79774643	3
chr12	79774643	79774653	1
chr12	79774653	79774663	0
chr12	79774663	79774673	0
chr12	79774673	79774683	3
chr12	79774683	79774693	4
chr12	79774693	79774703	15
chr12	79774703	79774713	2
chr12	79774713	79774723	6
chr12	79774723	79774733	9
chr12	79774733	79774743	6
chr12	79774743	79774753	6
chr12	79774753	79774763	5
chr12	79774763	79774773	4
chr12	79774773	79774783	6
chr12	79774783	79774793	9
chr12	79774793	79774803	10
chr12	79774803	79774813	3
chr12	79774813	79774823	10
chr12	79774823	79774833	8
chr12	79774833	79774843	0
chr12	79774843	79774853	6
chr12	79774853	79774863	2
chr12	79774863	79774873	5
chr12	79774873	79774883	7
chr12	79774883	79774893	2
chr12	79774893	79774903	9
chr12	79774903	79774913	7
chr12	79774913	79774923	9
chr12	79774923	79774933	11
chr12	79774933	79774943	8
chr12	79774943	79774953	4
chr12	79774953	79774963	3
chr12	79774963	79774973	4
chr12	79774973	79774983	7
chr12	79774983	79774993	8
chr12	79774993	79775003	9
chr12	79775003	79775013	1
chr12	79775013	79775023	29
chr12	79775023	79775033	3
chr12	79775033	79775043	5
chr12	79775043	79775053	9
chr12	79775053	79775063	5
chr12	79775063	79775073	9
chr12	79775073	79775083	8
chr12	79775083	79775093	10
chr12	79775093	79775103	8
chr12	79775103	79775113	5
chr12	79775113	79775123	17
chr12	79775123	79775133	15
chr12	79775133	79775143	4
chr12	79775143	79775153	14
chr12	79775153	79775163	6
chr12	79775163	79775173	9
chr12	79775173	79775183	15
chr12	79775183	79775193	3
chr12	79775193	79775203	7
chr12	79775203	79775213	7
chr12	79775213	79775223	8
chr12	79775223	79775233	11
chr12	79775233	79775243	7
chr12	79775243	79775253	4
chr12	79775253	79775263	5
chr12	79775263	79775273	12
chr12	79775273	79775283	18
chr12	79775283	79775293	22
chr12	79775293	79775303	9
chr12	79775303	79775313	5
chr12	79775313	79775323	10
chr12	79775323	79775333	7
chr12	79775333	79775343	7
chr12	79775343	79775353	3
chr12	79775353	79775363	3
chr12	79775363	79775373	1
chr12	79775373	79775383	1
chr12	79775383	79775393	3
chr12	79775393	79775403	8
chr12	79775403	79775413	0
chr12	79775413	79775423	1
chr12	79775423	79775433	0
chr12	79775433	79775443	5
chr12	79775443	79775453	1
chr12	79775453	79775463	0
chr12	79775463	79775473	1
chr12	79775473	79775483	0
chr12	79775483	79775493	1
chr12	79775493	79775503	1
chr12	79775503	79775513	0
chr12	79775513	79775523	0
chr12	79775523	79775533	0
chr12	79775533	79775543	1
chr12	79775543	79775553	3
chr12	79775553	79775563	0
chr12	79775563	79775573	1
chr12	79775573	79775583	0
chr12	79775583	79775593	0
chr12	79775593	79775603	0
chr12	79775603	79775613	0
chr12	79775613	79775623	0
chr12	79775623	79775633	0
chr12	79775633	79775643	0
chr12	79775643	79775653	2
chr12	79775653	79775663	0
chr12	79775663	79775673	0
chr12	79775673	79775683	3
chr12	79775683	79775693	2
chr12	79775693	79775703	2
chr12	79775703	79775713	3
chr12	79775713	79775723	0
chr12	79775723	79775733	5
chr12	79775733	79775743	3
chr12	79775743	79775753	3
chr12	79775753	79775763	7
chr12	79775763	79775773	8
chr12	79775773	79775783	3
chr12	79775783	79775793	7
chr12	79775793	79775803	14
chr12	79775803	79775813	6
chr12	79775813	79775823	4
chr12	79775823	79775833	11
chr12	79775833	79775843	8
chr12	79775843	79775853	7
chr12	79775853	79775863	11
chr12	79775863	79775873	13
chr12	79775873	79775883	10
chr12	79775883	79775893	10
chr12	79775893	79775903	7
chr12	79775903	79775913	5
chr12	79775913	79775923	4
chr12	79775923	79775933	5
chr12	79775933	79775943	12
chr12	79775943	79775953	9
chr12	79775953	79775963	17
chr12	79775963	79775973	4
chr12	79775973	79775983	8
chr12	79775983	79775993	5
chr12	79775993	79776003	9
chr12	79776003	79776013	8
chr12	79776013	79776023	9
chr12	79776023	79776033	4
chr12	79776033	79776043	3
chr12	79776043	79776053	36
chr12	79776053	79776063	3
chr12	79776063	79776073	11
chr12	79776073	79776083	13
chr12	79776083	79776093	5
chr12	79776093	79776103	4
chr12	79776103	79776113	2
chr12	79776113	79776123	6
chr12	79776123	79776133	9
chr12	79776133	79776143	2
chr12	79776143	79776153	3
chr12	79776153	79776163	4
chr12	79776163	79776173	3
chr12	79776173	79776183	6
chr12	79776183	79776193	9
chr12	79776193	79776203	6
chr12	79776203	79776213	6
chr12	79776213	79776223	4
chr12	79776223	79776233	6
chr12	79776233	79776243	3
chr12	79776243	79776253	3
chr12	79776253	79776263	1
chr12	79776263	79776273	6
chr12	79776273	79776283	11
chr12	79776283	79776293	6
chr12	79776293	79776303	7
chr12	79776303	79776313	11
chr12	79776313	79776323	4
chr12	79776323	79776333	6
chr12	79776333	79776343	8
chr12	79776343	79776353	3
chr12	79776353	79776363	10
chr12	79776363	79776373	7
chr12	79776373	79776383	5
chr12	79776383	79776393	8
chr12	79776393	79776403	10
chr12	79776403	79776413	7
chr12	79776413	79776423	5
chr12	79776423	79776433	1
chr12	79776433	79776443	21
chr12	79776443	79776453	6
chr12	79776453	79776463	5
chr12	79776463	79776473	7
chr12	79776473	79776483	4
chr12	79776483	79776493	4
chr12	79776493	79776503	7
chr12	79776503	79776513	10
chr12	79776513	79776523	4
chr12	79776523	79776533	13
chr12	79776533	79776543	12
chr12	79776543	79776553	4
chr12	79776553	79776563	14
chr12	79776563	79776573	6
chr12	79776573	79776583	6
chr12	79776583	79776593	16
chr12	79776593	79776603	8
chr12	79776603	79776613	2
chr12	79776613	79776623	2
chr12	79776623	79776633	1
chr12	79776633	79776643	3
chr12	79776643	79776653	2
chr12	79776653	79776663	2
chr12	79776663	79776673	1
chr12	79776673	79776683	5
chr12	79776683	79776693	0
chr12	79776693	79776703	0
chr12	79776703	79776713	1
chr12	79776713	79776723	2
chr12	79776723	79776733	0
chr12	79776733	79776743	0
chr12	79776743	79776753	1
chr12	79776753	79776763	0
chr12	79776763	79776773	2
chr12	79776773	79776783	0
chr12	79776783	79776793	0
chr12	79776793	79776803	0
chr12	79776803	79776813	0
chr12	79776813	79776823	0
chr12	79776823	79776833	0
chr12	79776833	79776843	1
chr12	79776843	79776853	0
chr12	79776853	79776863	0
chr12	79776863	79776873	0
chr12	79776873	79776883	0
chr12	79776883	79776893	0
chr12	79776893	79776903	0
chr12	79776903	79776913	0
chr12	79776913	79776923	0
chr12	79776923	79776933	0
chr12	79776933	79776943	0
chr12	79776943	79776953	0
chr12	79776953	79776963	0
chr12	79776963	79776973	0
chr12	79776973	79776983	0
chr12	79776983	79776993	0
chr12	79776993	79777003	0
chr12	79777003	79777013	0
chr12	79777013	79777023	0
chr12	79777023	79777033	0
chr12	79777033	79777043	0
chr12	79777043	79777053	2
chr12	79777053	79777063	1
chr12	79777063	79777073	0
chr12	79777073	79777083	0
chr12	79777083	79777093	0
chr12	79777093	79777103	0
chr12	79777103	79777113	0
chr12	79777113	79777123	0
chr12	79777123	79777133	0
chr12	79777133	79777143	0
chr12	79777143	79777153	0
chr12	79777153	79777163	1
chr12	79777163	79777173	0
chr12	79777173	79777183	0
chr12	79777183	79777193	3
chr12	79777193	79777203	0
chr12	79777203	79777213	4
chr12	79777213	79777223	0
chr12	79777223	79777233	2
chr12	79777233	79777243	4
chr12	79777243	79777253	1
chr12	79777253	79777263	4
chr12	79777263	79777273	2
chr12	79777273	79777283	2
chr12	79777283	79777293	6
chr12	79777293	79777303	7
chr12	79777303	79777313	6
chr12	79777313	79777323	5
chr12	79777323	79777333	11
chr12	79777333	79777343	10
chr12	79777343	79777353	8
chr12	79777353	79777363	8
chr12	79777363	79777373	5
chr12	79777373	79777383	3
chr12	79777383	79777393	6
chr12	79777393	79777403	6
chr12	79777403	79777413	0
chr12	79777413	79777423	0
chr12	79777423	79777433	1
chr12	79777433	79777443	1
chr12	79777443	79777453	6
chr12	79777453	79777463	1
chr12	79777463	79777473	3
chr12	79777473	79777483	7
chr12	79777483	79777493	5
chr12	79777493	79777503	12
chr12	79777503	79777513	1
chr12	79777513	79777523	3
chr12	79777523	79777533	6
chr12	79777533	79777543	6
chr12	79777543	79777553	7
chr12	79777553	79777563	7
chr12	79777563	79777573	7
chr12	79777573	79777583	1
chr12	79777583	79777593	3
chr12	79777593	79777603	8
chr12	79777603	79777613	3
chr12	79777613	79777623	4
chr12	79777623	79777633	7
chr12	79777633	79777643	3
chr12	79777643	79777653	3
chr12	79777653	79777663	12
chr12	79777663	79777673	5
chr12	79777673	79777683	12
chr12	79777683	79777693	7
chr12	79777693	79777703	0
chr12	79777703	79777713	46
chr12	79777713	79777723	2
chr12	79777723	79777733	8
chr12	79777733	79777743	7
chr12	79777743	79777753	9
chr12	79777753	79777763	2
chr12	79777763	79777773	4
chr12	79777773	79777783	5
chr12	79777783	79777793	2
chr12	79777793	79777803	8
chr12	79777803	79777813	12
chr12	79777813	79777823	5
chr12	79777823	79777833	2
chr12	79777833	79777843	58
chr12	79777843	79777853	6
chr12	79777853	79777863	2
chr12	79777863	79777873	4
chr12	79777873	79777883	11
chr12	79777883	79777893	6
chr12	79777893	79777903	4
chr12	79777903	79777913	4
chr12	79777913	79777923	2
chr12	79777923	79777933	5
chr12	79777933	79777943	3
chr12	79777943	79777953	2
chr12	79777953	79777963	6
chr12	79777963	79777973	4
chr12	79777973	79777983	4
chr12	79777983	79777993	8
chr12	79777993	79778003	1
chr12	79778003	79778013	1
chr12	79778013	79778023	2
chr12	79778023	79778033	2
chr12	79778033	79778043	2
chr12	79778043	79778053	3
chr12	79778053	79778063	4
chr12	79778063	79778073	2
chr12	79778073	79778083	3
chr12	79778083	79778093	1
chr12	79778093	79778103	3
chr12	79778103	79778113	1
chr12	79778113	79778123	2
chr12	79778123	79778133	0
chr12	79778133	79778143	2
chr12	79778143	79778153	1
chr12	79778153	79778163	1
chr12	79778163	79778173	2
chr12	79778173	79778183	2
chr12	79778183	79778193	4
chr12	79778193	79778203	5
chr12	79778203	79778213	2
chr12	79778213	79778223	3
chr12	79778223	79778233	2
chr12	79778233	79778243	10
chr12	79778243	79778253	2
chr12	79778253	79778263	4
chr12	79778263	79778273	4
chr12	79778273	79778283	4
chr12	79778283	79778293	6
chr12	79778293	79778303	5
chr12	79778303	79778313	7
chr12	79778313	79778323	4
chr12	79778323	79778333	7
chr12	79778333	79778343	3
chr12	79778343	79778353	13
chr12	79778353	79778363	4
chr12	79778363	79778373	5
chr12	79778373	79778383	1
chr12	79778383	79778393	7
chr12	79778393	79778403	8
chr12	79778403	79778413	6
chr12	79778413	79778423	6
chr12	79778423	79778433	4
chr12	79778433	79778443	27
chr12	79778443	79778453	13
chr12	79778453	79778463	6
chr12	79778463	79778473	1
chr12	79778473	79778483	22
chr12	79778483	79778493	7
chr12	79778493	79778503	2
chr12	79778503	79778513	9
chr12	79778513	79778523	8
chr12	79778523	79778533	15
chr12	79778533	79778543	8
chr12	79778543	79778553	7
chr12	79778553	79778563	9
chr12	79778563	79778573	7
chr12	79778573	79778583	4
chr12	79778583	79778593	10
chr12	79778593	79778603	7
chr12	79778603	79778613	6
chr12	79778613	79778623	15
chr12	79778623	79778633	7
chr12	79778633	79778643	5
chr12	79778643	79778653	15
chr12	79778653	79778663	3
chr12	79778663	79778673	7
chr12	79778673	79778683	10
chr12	79778683	79778693	13
chr12	79778693	79778703	9
chr12	79778703	79778713	9
chr12	79778713	79778723	5
chr12	79778723	79778733	7
chr12	79778733	79778743	9
chr12	79778743	79778753	5
chr12	79778753	79778763	12
chr12	79778763	79778773	9
chr12	79778773	79778783	5
chr12	79778783	79778793	11
chr12	79778793	79778803	13
chr12	79778803	79778813	6
chr12	79778813	79778823	2
chr12	79778823	79778833	27
chr12	79778833	79778843	135
chr12	79778843	79778853	2
chr12	79778853	79778863	4
chr12	79778863	79778873	7
chr12	79778873	79778883	6
chr12	79778883	79778893	3
chr12	79778893	79778903	4
chr12	79778903	79778913	4
chr12	79778913	79778923	7
chr12	79778923	79778933	9
chr12	79778933	79778943	7
chr12	79778943	79778953	2
chr12	79778953	79778963	6
chr12	79778963	79778973	1
chr12	79778973	79778983	3
chr12	79778983	79778993	4
chr12	79778993	79779003	2
chr12	79779003	79779013	18
chr12	79779013	79779023	3
chr12	79779023	79779033	8
chr12	79779033	79779043	9
chr12	79779043	79779053	2
chr12	79779053	79779063	8
chr12	79779063	79779073	2
chr12	79779073	79779083	4
chr12	79779083	79779093	11
chr12	79779093	79779103	10
chr12	79779103	79779113	4
chr12	79779113	79779123	7
chr12	79779123	79779133	5
chr12	79779133	79779143	5
chr12	79779143	79779153	3
chr12	79779153	79779163	3
chr12	79779163	79779173	4
chr12	79779173	79779183	2
chr12	79779183	79779193	3
chr12	79779193	79779203	0
chr12	79779203	79779213	2
chr12	79779213	79779223	0
chr12	79779223	79779233	0
chr12	79779233	79779243	3
chr12	79779243	79779253	0
chr12	79779253	79779263	1
chr12	79779263	79779273	0
chr12	79779273	79779283	1
chr12	79779283	79779293	1
chr12	79779293	79779303	0
chr12	79779303	79779313	0
chr12	79779313	79779323	2
chr12	79779323	79779333	0
chr12	79779333	79779343	0
chr12	79779343	79779353	0
chr12	79779353	79779363	1
chr12	79779363	79779373	2
chr12	79779373	79779383	0
chr12	79779383	79779393	1
chr12	79779393	79779403	2
chr12	79779403	79779413	0
chr12	79779413	79779423	1
chr12	79779423	79779433	3
chr12	79779433	79779443	0
chr12	79779443	79779453	3
chr12	79779453	79779463	2
chr12	79779463	79779473	2
chr12	79779473	79779483	2
chr12	79779483	79779493	5
chr12	79779493	79779503	7
chr12	79779503	79779513	2
chr12	79779513	79779523	0
chr12	79779523	79779533	3
chr12	79779533	79779543	1
chr12	79779543	79779553	4
chr12	79779553	79779563	0
chr12	79779563	79779573	8
chr12	79779573	79779583	1
chr12	79779583	79779593	3
chr12	79779593	79779603	6
chr12	79779603	79779613	2
chr12	79779613	79779623	0
chr12	79779623	79779633	0
chr12	79779633	79779643	0
chr12	79779643	79779653	1
chr12	79779653	79779663	3
chr12	79779663	79779673	0
chr12	79779673	79779683	0
chr12	79779683	79779693	2
chr12	79779693	79779703	0
chr12	79779703	79779713	1
chr12	79779713	79779723	2
chr12	79779723	79779733	5
chr12	79779733	79779743	6
chr12	79779743	79779753	5
chr12	79779753	79779763	5
chr12	79779763	79779773	2
chr12	79779773	79779783	4
chr12	79779783	79779793	1
chr12	79779793	79779803	2
chr12	79779803	79779813	3
chr12	79779813	79779823	4
chr12	79779823	79779833	0
chr12	79779833	79779843	1
chr12	79779843	79779853	7
chr12	79779853	79779863	1
chr12	79779863	79779873	3
chr12	79779873	79779883	2
chr12	79779883	79779893	7
chr12	79779893	79779903	3
chr12	79779903	79779913	9
chr12	79779913	79779923	6
chr12	79779923	79779933	5
chr12	79779933	79779943	1
chr12	79779943	79779953	7
chr12	79779953	79779963	1
chr12	79779963	79779973	0
chr12	79779973	79779983	0
chr12	79779983	79779993	0
chr12	79779993	79780003	3
chr12	79780003	79780013	3
chr12	79780013	79780023	0
chr12	79780023	79780033	0
chr12	79780033	79780043	0
chr12	79780043	79780053	2
chr12	79780053	79780063	0
chr12	79780063	79780073	4
chr12	79780073	79780083	2
chr12	79780083	79780093	3
chr12	79780093	79780103	2
chr12	79780103	79780113	4
chr12	79780113	79780123	0
chr12	79780123	79780133	1
chr12	79780133	79780143	0
chr12	79780143	79780153	1
chr12	79780153	79780163	0
chr12	79780163	79780173	2
chr12	79780173	79780183	1
chr12	79780183	79780193	1
chr12	79780193	79780203	2
chr12	79780203	79780213	3
chr12	79780213	79780223	0
chr12	79780223	79780233	2
chr12	79780233	79780243	1
chr12	79780243	79780253	2
chr12	79780253	79780263	3
chr12	79780263	79780273	4
chr12	79780273	79780283	5
chr12	79780283	79780293	2
chr12	79780293	79780303	2
chr12	79780303	79780313	1
chr12	79780313	79780323	1
chr12	79780323	79780333	0
chr12	79780333	79780343	8
chr12	79780343	79780353	3
chr12	79780353	79780363	1
chr12	79780363	79780373	0
chr12	79780373	79780383	6
chr12	79780383	79780393	5
chr12	79780393	79780403	6
chr12	79780403	79780413	10
chr12	79780413	79780423	4
chr12	79780423	79780433	16
chr12	79780433	79780443	4
chr12	79780443	79780453	0
chr12	79780453	79780463	0
chr12	79780463	79780473	2
chr12	79780473	79780483	5
chr12	79780483	79780493	5
chr12	79780493	79780503	9
chr12	79780503	79780513	10
chr12	79780513	79780523	5
chr12	79780523	79780533	0
chr12	79780533	79780543	3
chr12	79780543	79780553	7
chr12	79780553	79780563	7
chr12	79780563	79780573	11
chr12	79780573	79780583	4
chr12	79780583	79780593	5
chr12	79780593	79780603	2
chr12	79780603	79780613	14
chr12	79780613	79780623	8
chr12	79780623	79780633	6
chr12	79780633	79780643	2
chr12	79780643	79780653	8
chr12	79780653	79780663	4
chr12	79780663	79780673	4
chr12	79780673	79780683	2
chr12	79780683	79780693	4
chr12	79780693	79780703	4
chr12	79780703	79780713	1
chr12	79780713	79780723	5
chr12	79780723	79780733	0
chr12	79780733	79780743	0
chr12	79780743	79780753	1
chr12	79780753	79780763	0
chr12	79780763	79780773	0
chr12	79780773	79780783	0
chr12	79780783	79780793	0
chr12	79780793	79780803	0
chr12	79780803	79780813	0
chr12	79780813	79780823	0
chr12	79780823	79780833	0
chr12	79780833	79780843	0
chr12	79780843	79780853	0
chr12	79780853	79780863	0
chr12	79780863	79780873	0
chr12	79780873	79780883	0
chr12	79780883	79780893	0
chr12	79780893	79780903	0
chr12	79780903	79780913	0
chr12	79780913	79780923	0
chr12	79780923	79780933	0
chr12	79780933	79780943	0
chr12	79780943	79780953	0
chr12	79780953	79780963	0
chr12	79780963	79780973	0
chr12	79780973	79780983	0
chr12	79780983	79780993	0
chr12	79780993	79781003	0
chr12	79781003	79781013	0
chr12	79781013	79781023	1
chr12	79781023	79781033	0
chr12	79781033	79781043	0
chr12	79781043	79781053	0
chr12	79781053	79781063	0
chr12	79781063	79781073	0
chr12	79781073	79781083	0
chr12	79781083	79781093	0
chr12	79781093	79781103	0
chr12	79781103	79781113	0
chr12	79781113	79781123	0
chr12	79781123	79781133	0
chr12	79781133	79781143	0
chr12	79781143	79781153	0
chr12	79781153	79781163	0
chr12	79781163	79781173	0
chr12	79781173	79781183	0
chr12	79781183	79781193	0
chr12	79781193	79781203	0
chr12	79781203	79781213	0
chr12	79781213	79781223	0
chr12	79781223	79781233	0
chr12	79781233	79781243	0
chr12	79781243	79781253	0
chr12	79781253	79781263	0
chr12	79781263	79781273	0
chr12	79781273	79781283	0
chr12	79781283	79781293	0
chr12	79781293	79781303	1
chr12	79781303	79781313	1
chr12	79781313	79781323	2
chr12	79781323	79781333	0
chr12	79781333	79781343	0
chr12	79781343	79781353	0
chr12	79781353	79781363	0
chr12	79781363	79781373	0
chr12	79781373	79781383	3
chr12	79781383	79781393	1
chr12	79781393	79781403	1
chr12	79781403	79781413	1
chr12	79781413	79781423	0
chr12	79781423	79781433	0
chr12	79781433	79781443	1
chr12	79781443	79781453	1
chr12	79781453	79781463	0
chr12	79781463	79781473	2
chr12	79781473	79781483	3
chr12	79781483	79781493	3
chr12	79781493	79781503	7
chr12	79781503	79781513	1
chr12	79781513	79781523	5
chr12	79781523	79781533	1
chr12	79781533	79781543	12
chr12	79781543	79781553	4
chr12	79781553	79781563	5
chr12	79781563	79781573	7
chr12	79781573	79781583	6
chr12	79781583	79781593	9
chr12	79781593	79781603	7
chr12	79781603	79781613	4
chr12	79781613	79781623	4
chr12	79781623	79781633	9
chr12	79781633	79781643	3
chr12	79781643	79781653	6
chr12	79781653	79781663	0
chr12	79781663	79781673	23
chr12	79781673	79781683	2
chr12	79781683	79781693	6
chr12	79781693	79781703	7
chr12	79781703	79781713	0
chr12	79781713	79781723	51
chr12	79781723	79781733	1
chr12	79781733	79781743	0
chr12	79781743	79781753	11
chr12	79781753	79781763	6
chr12	79781763	79781773	10
chr12	79781773	79781783	4
chr12	79781783	79781793	3
chr12	79781793	79781803	5
chr12	79781803	79781813	4
chr12	79781813	79781823	2
chr12	79781823	79781833	7
chr12	79781833	79781843	1
chr12	79781843	79781853	4
chr12	79781853	79781863	6
chr12	79781863	79781873	6
chr12	79781873	79781883	6
chr12	79781883	79781893	4
chr12	79781893	79781903	3
chr12	79781903	79781913	4
chr12	79781913	79781923	2
chr12	79781923	79781933	3
chr12	79781933	79781943	1
chr12	79781943	79781953	3
chr12	79781953	79781963	0
chr12	79781963	79781973	1
chr12	79781973	79781983	1
chr12	79781983	79781993	1
chr12	79781993	79782003	1
chr12	79782003	79782013	1
chr12	79782013	79782023	1
chr12	79782023	79782033	2
chr12	79782033	79782043	3
chr12	79782043	79782053	2
chr12	79782053	79782063	3
chr12	79782063	79782073	6
chr12	79782073	79782083	3
chr12	79782083	79782093	5
chr12	79782093	79782103	3
chr12	79782103	79782113	4
chr12	79782113	79782123	3
chr12	79782123	79782133	2
chr12	79782133	79782143	1
chr12	79782143	79782153	2
chr12	79782153	79782163	7
chr12	79782163	79782173	4
chr12	79782173	79782183	7
chr12	79782183	79782193	9
chr12	79782193	79782203	6
chr12	79782203	79782213	5
chr12	79782213	79782223	14
chr12	79782223	79782233	5
chr12	79782233	79782243	3
chr12	79782243	79782253	3
chr12	79782253	79782263	4
chr12	79782263	79782273	2
chr12	79782273	79782283	9
chr12	79782283	79782293	3
chr12	79782293	79782303	4
chr12	79782303	79782313	8
chr12	79782313	79782323	9
chr12	79782323	79782333	7
chr12	79782333	79782343	13
chr12	79782343	79782353	15
chr12	79782353	79782363	15
chr12	79782363	79782373	5
chr12	79782373	79782383	5
chr12	79782383	79782393	1
chr12	79782393	79782403	25
chr12	79782403	79782413	10
chr12	79782413	79782423	3
chr12	79782423	79782433	11
chr12	79782433	79782443	18
chr12	79782443	79782453	14
chr12	79782453	79782463	5
chr12	79782463	79782473	7
chr12	79782473	79782483	8
chr12	79782483	79782493	12
chr12	79782493	79782503	4
chr12	79782503	79782513	6
chr12	79782513	79782523	15
chr12	79782523	79782533	6
chr12	79782533	79782543	7
chr12	79782543	79782553	3
chr12	79782553	79782563	5
chr12	79782563	79782573	6
chr12	79782573	79782583	9
chr12	79782583	79782593	4
chr12	79782593	79782603	3
chr12	79782603	79782613	6
chr12	79782613	79782623	7
chr12	79782623	79782633	3
chr12	79782633	79782643	7
chr12	79782643	79782653	21
chr12	79782653	79782663	0
chr12	79782663	79782673	9
chr12	79782673	79782683	6
chr12	79782683	79782693	0
chr12	79782693	79782703	19
chr12	79782703	79782713	3
chr12	79782713	79782723	4
chr12	79782723	79782733	6
chr12	79782733	79782743	11
chr12	79782743	79782753	6
chr12	79782753	79782763	5
chr12	79782763	79782773	6
chr12	79782773	79782783	8
chr12	79782783	79782793	12
chr12	79782793	79782803	9
chr12	79782803	79782813	16
chr12	79782813	79782823	8
chr12	79782823	79782833	4
chr12	79782833	79782843	14
chr12	79782843	79782853	8
chr12	79782853	79782863	4
chr12	79782863	79782873	5
chr12	79782873	79782883	7
chr12	79782883	79782893	3
chr12	79782893	79782903	6
chr12	79782903	79782913	1
chr12	79782913	79782923	3
chr12	79782923	79782933	5
chr12	79782933	79782943	8
chr12	79782943	79782953	7
chr12	79782953	79782963	15
chr12	79782963	79782973	3
chr12	79782973	79782983	1
chr12	79782983	79782993	7
chr12	79782993	79783003	1
chr12	79783003	79783013	0
chr12	79783013	79783023	1
chr12	79783023	79783033	1
chr12	79783033	79783043	1
chr12	79783043	79783053	7
chr12	79783053	79783063	5
chr12	79783063	79783073	5
chr12	79783073	79783083	5
chr12	79783083	79783093	5
chr12	79783093	79783103	3
chr12	79783103	79783113	4
chr12	79783113	79783123	6
chr12	79783123	79783133	4
chr12	79783133	79783143	7
chr12	79783143	79783153	5
chr12	79783153	79783163	2
chr12	79783163	79783173	4
chr12	79783173	79783183	7
chr12	79783183	79783193	3
chr12	79783193	79783203	2
chr12	79783203	79783213	4
chr12	79783213	79783223	0
chr12	79783223	79783233	2
chr12	79783233	79783243	3
chr12	79783243	79783253	5
chr12	79783253	79783263	2
chr12	79783263	79783273	4
chr12	79783273	79783283	1
chr12	79783283	79783293	2
chr12	79783293	79783303	6
chr12	79783303	79783313	8
chr12	79783313	79783323	4
chr12	79783323	79783333	3
chr12	79783333	79783343	4
chr12	79783343	79783353	7
chr12	79783353	79783363	7
chr12	79783363	79783373	3
chr12	79783373	79783383	6
chr12	79783383	79783393	3
chr12	79783393	79783403	5
chr12	79783403	79783413	2
chr12	79783413	79783423	0
chr12	79783423	79783433	2
chr12	79783433	79783443	0
chr12	79783443	79783453	4
chr12	79783453	79783463	6
chr12	79783463	79783473	1
chr12	79783473	79783483	2
chr12	79783483	79783493	2
chr12	79783493	79783503	4
chr12	79783503	79783513	3
chr12	79783513	79783523	2
chr12	79783523	79783533	6
chr12	79783533	79783543	7
chr12	79783543	79783553	2
chr12	79783553	79783563	5
chr12	79783563	79783573	0
chr12	79783573	79783583	3
chr12	79783583	79783593	3
chr12	79783593	79783603	2
chr12	79783603	79783613	3
chr12	79783613	79783623	3
chr12	79783623	79783633	6
chr12	79783633	79783643	2
chr12	79783643	79783653	3
chr12	79783653	79783663	3
chr12	79783663	79783673	5
chr12	79783673	79783683	3
chr12	79783683	79783693	2
chr12	79783693	79783703	7
chr12	79783703	79783713	2
chr12	79783713	79783723	3
chr12	79783723	79783733	5
chr12	79783733	79783743	9
chr12	79783743	79783753	2
chr12	79783753	79783763	6
chr12	79783763	79783773	4
chr12	79783773	79783783	26
chr12	79783783	79783793	2
chr12	79783793	79783803	4
chr12	79783803	79783813	5
chr12	79783813	79783823	5
chr12	79783823	79783833	5
chr12	79783833	79783843	8
chr12	79783843	79783853	7
chr12	79783853	79783863	11
chr12	79783863	79783873	3
chr12	79783873	79783883	6
chr12	79783883	79783893	4
chr12	79783893	79783903	1
chr12	79783903	79783913	8
chr12	79783913	79783923	3
chr12	79783923	79783933	3
chr12	79783933	79783943	21
chr12	79783943	79783953	13
chr12	79783953	79783963	10
chr12	79783963	79783973	7
chr12	79783973	79783983	6
chr12	79783983	79783993	5
chr12	79783993	79784003	9
chr12	79784003	79784013	3
chr12	79784013	79784023	7
chr12	79784023	79784033	1
chr12	79784033	79784043	1
chr12	79784043	79784053	0
chr12	79784053	79784063	5
chr12	79784063	79784073	4
chr12	79784073	79784083	3
chr12	79784083	79784093	2
chr12	79784093	79784103	6
chr12	79784103	79784113	2
chr12	79784113	79784123	4
chr12	79784123	79784133	2
chr12	79784133	79784143	3
chr12	79784143	79784153	3
chr12	79784153	79784163	4
chr12	79784163	79784173	4
chr12	79784173	79784183	6
chr12	79784183	79784193	3
chr12	79784193	79784203	2
chr12	79784203	79784213	1
chr12	79784213	79784223	6
chr12	79784223	79784233	0
chr12	79784233	79784243	2
chr12	79784243	79784253	1
chr12	79784253	79784263	3
chr12	79784263	79784273	3
chr12	79784273	79784283	4
chr12	79784283	79784293	4
chr12	79784293	79784303	3
chr12	79784303	79784313	3
chr12	79784313	79784323	7
chr12	79784323	79784333	0
chr12	79784333	79784343	2
chr12	79784343	79784353	2
chr12	79784353	79784363	0
chr12	79784363	79784373	4
chr12	79784373	79784383	3
chr12	79784383	79784393	7
chr12	79784393	79784403	5
chr12	79784403	79784413	3
chr12	79784413	79784423	3
chr12	79784423	79784433	4
chr12	79784433	79784443	4
chr12	79784443	79784453	6
chr12	79784453	79784463	2
chr12	79784463	79784473	2
chr12	79784473	79784483	4
chr12	79784483	79784493	3
chr12	79784493	79784503	4
chr12	79784503	79784513	1
chr12	79784513	79784523	1
chr12	79784523	79784533	1
chr12	79784533	79784543	6
chr12	79784543	79784553	7
chr12	79784553	79784563	1
chr12	79784563	79784573	0
chr12	79784573	79784583	6
chr12	79784583	79784593	2
chr12	79784593	79784603	6
chr12	79784603	79784613	0
chr12	79784613	79784623	1
chr12	79784623	79784633	3
chr12	79784633	79784643	4
chr12	79784643	79784653	2
chr12	79784653	79784663	3
chr12	79784663	79784673	2
chr12	79784673	79784683	2
chr12	79784683	79784693	6
chr12	79784693	79784703	1
chr12	79784703	79784713	0
chr12	79784713	79784723	2
chr12	79784723	79784733	5
chr12	79784733	79784743	1
chr12	79784743	79784753	3
chr12	79784753	79784763	0
chr12	79784763	79784773	1
chr12	79784773	79784783	1
chr12	79784783	79784793	1
chr12	79784793	79784803	1
chr12	79784803	79784813	5
chr12	79784813	79784823	4
chr12	79784823	79784833	4
chr12	79784833	79784843	3
chr12	79784843	79784853	8
chr12	79784853	79784863	6
chr12	79784863	79784873	6
chr12	79784873	79784883	2
chr12	79784883	79784893	3
chr12	79784893	79784903	6
chr12	79784903	79784913	5
chr12	79784913	79784923	4
chr12	79784923	79784933	1
chr12	79784933	79784943	5
chr12	79784943	79784953	11
chr12	79784953	79784963	3
chr12	79784963	79784973	4
chr12	79784973	79784983	8
chr12	79784983	79784993	7
chr12	79784993	79785003	2
chr12	79785003	79785013	0
chr12	79785013	79785023	0
chr12	79785023	79785033	0
chr12	79785033	79785043	8
chr12	79785043	79785053	4
chr12	79785053	79785063	6
chr12	79785063	79785073	6
chr12	79785073	79785083	2
chr12	79785083	79785093	2
chr12	79785093	79785103	2
chr12	79785103	79785113	4
chr12	79785113	79785123	3
chr12	79785123	79785133	4
chr12	79785133	79785143	6
chr12	79785143	79785153	2
chr12	79785153	79785163	3
chr12	79785163	79785173	12
chr12	79785173	79785183	4
chr12	79785183	79785193	2
chr12	79785193	79785203	6
chr12	79785203	79785213	5
chr12	79785213	79785223	2
chr12	79785223	79785233	6
chr12	79785233	79785243	1
chr12	79785243	79785253	4
chr12	79785253	79785263	3
chr12	79785263	79785273	0
chr12	79785273	79785283	2
chr12	79785283	79785293	4
chr12	79785293	79785303	6
chr12	79785303	79785313	0
chr12	79785313	79785323	3
chr12	79785323	79785333	2
chr12	79785333	79785343	0
chr12	79785343	79785353	3
chr12	79785353	79785363	2
chr12	79785363	79785373	5
chr12	79785373	79785383	5
chr12	79785383	79785393	3
chr12	79785393	79785403	2
chr12	79785403	79785413	4
chr12	79785413	79785423	4
chr12	79785423	79785433	5
chr12	79785433	79785443	3
chr12	79785443	79785453	6
chr12	79785453	79785463	11
chr12	79785463	79785473	7
chr12	79785473	79785483	0
chr12	79785483	79785493	2
chr12	79785493	79785503	2
chr12	79785503	79785513	3
chr12	79785513	79785523	2
chr12	79785523	79785533	4
chr12	79785533	79785543	6
chr12	79785543	79785553	3
chr12	79785553	79785563	9
chr12	79785563	79785573	3
chr12	79785573	79785583	3
chr12	79785583	79785593	3
chr12	79785593	79785603	3
chr12	79785603	79785613	6
chr12	79785613	79785623	2
chr12	79785623	79785633	5
chr12	79785633	79785643	4
chr12	79785643	79785653	0
chr12	79785653	79785663	7
chr12	79785663	79785673	3
chr12	79785673	79785683	2
chr12	79785683	79785693	6
chr12	79785693	79785703	4
chr12	79785703	79785713	11
chr12	79785713	79785723	6
chr12	79785723	79785733	8
chr12	79785733	79785743	11
chr12	79785743	79785753	9
chr12	79785753	79785763	3
chr12	79785763	79785773	5
chr12	79785773	79785783	2
chr12	79785783	79785793	0
chr12	79785793	79785803	2
chr12	79785803	79785813	2
chr12	79785813	79785823	1
chr12	79785823	79785833	3
chr12	79785833	79785843	1
chr12	79785843	79785853	1
chr12	79785853	79785863	1
chr12	79785863	79785873	0
chr12	79785873	79785883	0
chr12	79785883	79785893	2
chr12	79785893	79785903	1
chr12	79785903	79785913	0
chr12	79785913	79785923	0
chr12	79785923	79785933	0
chr12	79785933	79785943	0
chr12	79785943	79785953	2
chr12	79785953	79785963	0
chr12	79785963	79785973	0
chr12	79785973	79785983	0
chr12	79785983	79785993	0
chr12	79785993	79786003	0
chr12	79786003	79786013	0
chr12	79786013	79786023	1
chr12	79786023	79786033	0
chr12	79786033	79786043	0
chr12	79786043	79786053	1
chr12	79786053	79786063	9
chr12	79786063	79786073	5
chr12	79786073	79786083	0
chr12	79786083	79786093	1
chr12	79786093	79786103	4
chr12	79786103	79786113	1
chr12	79786113	79786123	2
chr12	79786123	79786133	4
chr12	79786133	79786143	9
chr12	79786143	79786153	7
chr12	79786153	79786163	5
chr12	79786163	79786173	10
chr12	79786173	79786183	4
chr12	79786183	79786193	3
chr12	79786193	79786203	9
chr12	79786203	79786213	9
chr12	79786213	79786223	2
chr12	79786223	79786233	12
chr12	79786233	79786243	4
chr12	79786243	79786253	8
chr12	79786253	79786263	6
chr12	79786263	79786273	2
chr12	79786273	79786283	1
chr12	79786283	79786293	0
chr12	79786293	79786303	0
chr12	79786303	79786313	7
chr12	79786313	79786323	7
chr12	79786323	79786333	4
chr12	79786333	79786343	5
chr12	79786343	79786353	7
chr12	79786353	79786363	2
chr12	79786363	79786373	4
chr12	79786373	79786383	6
chr12	79786383	79786393	5
chr12	79786393	79786403	8
chr12	79786403	79786413	13
chr12	79786413	79786423	14
chr12	79786423	79786433	11
chr12	79786433	79786443	2
chr12	79786443	79786453	6
chr12	79786453	79786463	5
chr12	79786463	79786473	10
chr12	79786473	79786483	2
chr12	79786483	79786493	0
chr12	79786493	79786503	1
chr12	79786503	79786513	2
chr12	79786513	79786523	1
chr12	79786523	79786533	0
chr12	79786533	79786543	4
chr12	79786543	79786553	0
chr12	79786553	79786563	1
chr12	79786563	79786573	1
chr12	79786573	79786583	0
chr12	79786583	79786593	0
chr12	79786593	79786603	1
chr12	79786603	79786613	2
chr12	79786613	79786623	0
chr12	79786623	79786633	0
chr12	79786633	79786643	0
chr12	79786643	79786653	0
chr12	79786653	79786663	0
chr12	79786663	79786673	0
chr12	79786673	79786683	0
chr12	79786683	79786693	1
chr12	79786693	79786703	0
chr12	79786703	79786713	0
chr12	79786713	79786723	0
chr12	79786723	79786733	0
chr12	79786733	79786743	0
chr12	79786743	79786753	1
chr12	79786753	79786763	0
chr12	79786763	79786773	1
chr12	79786773	79786783	0
chr12	79786783	79786793	0
chr12	79786793	79786803	0
chr12	79786803	79786813	0
chr12	79786813	79786823	0
chr12	79786823	79786833	2
chr12	79786833	79786843	1
chr12	79786843	79786853	1
chr12	79786853	79786863	1
chr12	79786863	79786873	2
chr12	79786873	79786883	5
chr12	79786883	79786893	3
chr12	79786893	79786903	1
chr12	79786903	79786913	1
chr12	79786913	79786923	5
chr12	79786923	79786933	1
chr12	79786933	79786943	0
chr12	79786943	79786953	2
chr12	79786953	79786963	3
chr12	79786963	79786973	4
chr12	79786973	79786983	5
chr12	79786983	79786993	6
chr12	79786993	79787003	7
chr12	79787003	79787013	2
chr12	79787013	79787023	4
chr12	79787023	79787033	0
chr12	79787033	79787043	3
chr12	79787043	79787053	3
chr12	79787053	79787063	4
chr12	79787063	79787073	2
chr12	79787073	79787083	3
chr12	79787083	79787093	8
chr12	79787093	79787103	3
chr12	79787103	79787113	1
chr12	79787113	79787123	8
chr12	79787123	79787133	3
chr12	79787133	79787143	5
chr12	79787143	79787153	3
chr12	79787153	79787163	10
chr12	79787163	79787173	9
chr12	79787173	79787183	0
chr12	79787183	79787193	1
chr12	79787193	79787203	6
chr12	79787203	79787213	5
chr12	79787213	79787223	22
chr12	79787223	79787233	4
chr12	79787233	79787243	3
chr12	79787243	79787253	4
chr12	79787253	79787263	6
chr12	79787263	79787273	10
chr12	79787273	79787283	5
chr12	79787283	79787293	10
chr12	79787293	79787303	11
chr12	79787303	79787313	16
chr12	79787313	79787323	10
chr12	79787323	79787333	5
chr12	79787333	79787343	16
chr12	79787343	79787353	5
chr12	79787353	79787363	5
chr12	79787363	79787373	8
chr12	79787373	79787383	2
chr12	79787383	79787393	3
chr12	79787393	79787403	1
chr12	79787403	79787413	3
chr12	79787413	79787423	1
chr12	79787423	79787433	0
chr12	79787433	79787443	4
chr12	79787443	79787453	0
chr12	79787453	79787463	1
chr12	79787463	79787473	5
chr12	79787473	79787483	0
chr12	79787483	79787493	3
chr12	79787493	79787503	1
chr12	79787503	79787513	1
chr12	79787513	79787523	1
chr12	79787523	79787533	2
chr12	79787533	79787543	0
chr12	79787543	79787553	0
chr12	79787553	79787563	3
chr12	79787563	79787573	0
chr12	79787573	79787583	2
chr12	79787583	79787593	1
chr12	79787593	79787603	1
chr12	79787603	79787613	0
chr12	79787613	79787623	0
chr12	79787623	79787633	0
chr12	79787633	79787643	1
chr12	79787643	79787653	0
chr12	79787653	79787663	0
chr12	79787663	79787673	1
chr12	79787673	79787683	0
chr12	79787683	79787693	1
chr12	79787693	79787703	0
chr12	79787703	79787713	0
chr12	79787713	79787723	0
chr12	79787723	79787733	1
chr12	79787733	79787743	0
chr12	79787743	79787753	0
chr12	79787753	79787763	0
chr12	79787763	79787773	0
chr12	79787773	79787783	0
chr12	79787783	79787793	0
chr12	79787793	79787803	0
chr12	79787803	79787813	0
chr12	79787813	79787823	0
chr12	79787823	79787833	0
chr12	79787833	79787843	0
chr12	79787843	79787853	0
chr12	79787853	79787863	0
chr12	79787863	79787873	0
chr12	79787873	79787883	0
chr12	79787883	79787893	0
chr12	79787893	79787903	0
chr12	79787903	79787913	0
chr12	79787913	79787923	0
chr12	79787923	79787933	0
chr12	79787933	79787943	0
chr12	79787943	79787953	1
chr12	79787953	79787963	2
chr12	79787963	79787973	0
chr12	79787973	79787983	3
chr12	79787983	79787993	2
chr12	79787993	79788003	0
chr12	79788003	79788013	0
chr12	79788013	79788023	2
chr12	79788023	79788033	3
chr12	79788033	79788043	3
chr12	79788043	79788053	1
chr12	79788053	79788063	2
chr12	79788063	79788073	4
chr12	79788073	79788083	1
chr12	79788083	79788093	4
chr12	79788093	79788103	2
chr12	79788103	79788113	6
chr12	79788113	79788123	2
chr12	79788123	79788133	3
chr12	79788133	79788143	12
chr12	79788143	79788153	9
chr12	79788153	79788163	4
chr12	79788163	79788173	14
chr12	79788173	79788183	8
chr12	79788183	79788193	10
chr12	79788193	79788203	7
chr12	79788203	79788213	14
chr12	79788213	79788223	7
chr12	79788223	79788233	4
chr12	79788233	79788243	12
chr12	79788243	79788253	4
chr12	79788253	79788263	8
chr12	79788263	79788273	11
chr12	79788273	79788283	18
chr12	79788283	79788293	8
chr12	79788293	79788303	10
chr12	79788303	79788313	2
chr12	79788313	79788323	1
chr12	79788323	79788333	1
chr12	79788333	79788343	10
chr12	79788343	79788353	7
chr12	79788353	79788363	5
chr12	79788363	79788373	8
chr12	79788373	79788383	9
chr12	79788383	79788393	8
chr12	79788393	79788403	13
chr12	79788403	79788413	10
chr12	79788413	79788423	4
chr12	79788423	79788433	8
chr12	79788433	79788443	6
chr12	79788443	79788453	7
chr12	79788453	79788463	1
chr12	79788463	79788473	7
chr12	79788473	79788483	5
chr12	79788483	79788493	4
chr12	79788493	79788503	6
chr12	79788503	79788513	2
chr12	79788513	79788523	5
chr12	79788523	79788533	1
chr12	79788533	79788543	2
chr12	79788543	79788553	3
chr12	79788553	79788563	4
chr12	79788563	79788573	3
chr12	79788573	79788583	0
chr12	79788583	79788593	2
chr12	79788593	79788603	0
chr12	79788603	79788613	1
chr12	79788613	79788623	1
chr12	79788623	79788633	0
chr12	79788633	79788643	2
chr12	79788643	79788653	0
chr12	79788653	79788663	0
chr12	79788663	79788673	0
chr12	79788673	79788683	0
chr12	79788683	79788693	4
chr12	79788693	79788703	1
chr12	79788703	79788713	2
chr12	79788713	79788723	2
chr12	79788723	79788733	3
chr12	79788733	79788743	1
chr12	79788743	79788753	1
chr12	79788753	79788763	5
chr12	79788763	79788773	1
chr12	79788773	79788783	3
chr12	79788783	79788793	1
chr12	79788793	79788803	2
chr12	79788803	79788813	4
chr12	79788813	79788823	4
chr12	79788823	79788833	4
chr12	79788833	79788843	6
chr12	79788843	79788853	8
chr12	79788853	79788863	8
chr12	79788863	79788873	4
chr12	79788873	79788883	3
chr12	79788883	79788893	5
chr12	79788893	79788903	9
chr12	79788903	79788913	2
chr12	79788913	79788923	2
chr12	79788923	79788933	7
chr12	79788933	79788943	6
chr12	79788943	79788953	6
chr12	79788953	79788963	4
chr12	79788963	79788973	0
chr12	79788973	79788983	15
chr12	79788983	79788993	3
chr12	79788993	79789003	3
chr12	79789003	79789013	10
chr12	79789013	79789023	8
chr12	79789023	79789033	10
chr12	79789033	79789043	4
chr12	79789043	79789053	6
chr12	79789053	79789063	10
chr12	79789063	79789073	7
chr12	79789073	79789083	6
chr12	79789083	79789093	6
chr12	79789093	79789103	14
chr12	79789103	79789113	11
chr12	79789113	79789123	13
chr12	79789123	79789133	4
chr12	79789133	79789143	10
chr12	79789143	79789153	4
chr12	79789153	79789163	16
chr12	79789163	79789173	6
chr12	79789173	79789183	10
chr12	79789183	79789193	2
chr12	79789193	79789203	1
chr12	79789203	79789213	3
chr12	79789213	79789223	10
chr12	79789223	79789233	3
chr12	79789233	79789243	21
chr12	79789243	79789253	4
chr12	79789253	79789263	5
chr12	79789263	79789273	4
chr12	79789273	79789283	3
chr12	79789283	79789293	6
chr12	79789293	79789303	2
chr12	79789303	79789313	9
chr12	79789313	79789323	10
chr12	79789323	79789333	5
chr12	79789333	79789343	17
chr12	79789343	79789353	7
chr12	79789353	79789363	11
chr12	79789363	79789373	7
chr12	79789373	79789383	4
chr12	79789383	79789393	5
chr12	79789393	79789403	16
chr12	79789403	79789413	4
chr12	79789413	79789423	4
chr12	79789423	79789433	2
chr12	79789433	79789443	9
chr12	79789443	79789453	5
chr12	79789453	79789463	0
chr12	79789463	79789473	6
chr12	79789473	79789483	3
chr12	79789483	79789493	6
chr12	79789493	79789503	4
chr12	79789503	79789513	6
chr12	79789513	79789523	5
chr12	79789523	79789533	3
chr12	79789533	79789543	2
chr12	79789543	79789553	2
chr12	79789553	79789563	1
chr12	79789563	79789573	0
chr12	79789573	79789583	1
chr12	79789583	79789593	3
chr12	79789593	79789603	3
chr12	79789603	79789613	2
chr12	79789613	79789623	0
chr12	79789623	79789633	0
chr12	79789633	79789643	1
chr12	79789643	79789653	1
chr12	79789653	79789663	0
chr12	79789663	79789673	0
chr12	79789673	79789683	0
chr12	79789683	79789693	1
chr12	79789693	79789703	0
chr12	79789703	79789713	0
chr12	79789713	79789723	1
chr12	79789723	79789733	0
chr12	79789733	79789743	0
chr12	79789743	79789753	1
chr12	79789753	79789763	0
chr12	79789763	79789773	0
chr12	79789773	79789783	0
chr12	79789783	79789793	0
chr12	79789793	79789803	0
chr12	79789803	79789813	0
chr12	79789813	79789823	0
chr12	79789823	79789833	0
chr12	79789833	79789843	0
chr12	79789843	79789853	0
chr12	79789853	79789863	0
chr12	79789863	79789873	0
chr12	79789873	79789883	0
chr12	79789883	79789893	0
chr12	79789893	79789903	0
chr12	79789903	79789913	0
chr12	79789913	79789923	0
chr12	79789923	79789933	0
chr12	79789933	79789943	0
chr12	79789943	79789953	0
chr12	79789953	79789963	0
chr12	79789963	79789973	1
chr12	79789973	79789983	0
chr12	79789983	79789993	0
chr12	79789993	79790003	0
chr12	79790003	79790013	0
chr12	79790013	79790023	0
chr12	79790023	79790033	0
chr12	79790033	79790043	0
chr12	79790043	79790053	0
chr12	79790053	79790063	0
chr12	79790063	79790073	0
chr12	79790073	79790083	0
chr12	79790083	79790093	0
chr12	79790093	79790103	0
chr12	79790103	79790113	0
chr12	79790113	79790123	1
chr12	79790123	79790133	0
chr12	79790133	79790143	0
chr12	79790143	79790153	1
chr12	79790153	79790163	0
chr12	79790163	79790173	3
chr12	79790173	79790183	3
chr12	79790183	79790193	0
chr12	79790193	79790203	0
chr12	79790203	79790213	0
chr12	79790213	79790223	0
chr12	79790223	79790233	3
chr12	79790233	79790243	2
chr12	79790243	79790253	3
chr12	79790253	79790263	7
chr12	79790263	79790273	5
chr12	79790273	79790283	5
chr12	79790283	79790293	4
chr12	79790293	79790303	5
chr12	79790303	79790313	0
chr12	79790313	79790323	0
chr12	79790323	79790333	1
chr12	79790333	79790343	1
chr12	79790343	79790353	3
chr12	79790353	79790363	0
chr12	79790363	79790373	7
chr12	79790373	79790383	3
chr12	79790383	79790393	2
chr12	79790393	79790403	1
chr12	79790403	79790413	7
chr12	79790413	79790423	6
chr12	79790423	79790433	4
chr12	79790433	79790443	4
chr12	79790443	79790453	0
chr12	79790453	79790463	0
chr12	79790463	79790473	1
chr12	79790473	79790483	1
chr12	79790483	79790493	0
chr12	79790493	79790503	1
chr12	79790503	79790513	7
chr12	79790513	79790523	7
chr12	79790523	79790533	4
chr12	79790533	79790543	3
chr12	79790543	79790553	4
chr12	79790553	79790563	2
chr12	79790563	79790573	4
chr12	79790573	79790583	2
chr12	79790583	79790593	1
chr12	79790593	79790603	1
chr12	79790603	79790613	6
chr12	79790613	79790623	3
chr12	79790623	79790633	1
chr12	79790633	79790643	3
chr12	79790643	79790653	3
chr12	79790653	79790663	0
chr12	79790663	79790673	1
chr12	79790673	79790683	1
chr12	79790683	79790693	0
chr12	79790693	79790703	1
chr12	79790703	79790713	0
chr12	79790713	79790723	0
chr12	79790723	79790733	2
chr12	79790733	79790743	2
chr12	79790743	79790753	0
chr12	79790753	79790763	0
chr12	79790763	79790773	6
chr12	79790773	79790783	0
chr12	79790783	79790793	2
chr12	79790793	79790803	3
chr12	79790803	79790813	0
chr12	79790813	79790823	1
chr12	79790823	79790833	3
chr12	79790833	79790843	0
chr12	79790843	79790853	2
chr12	79790853	79790863	3
chr12	79790863	79790873	2
chr12	79790873	79790883	3
chr12	79790883	79790893	3
chr12	79790893	79790903	2
chr12	79790903	79790913	7
chr12	79790913	79790923	6
chr12	79790923	79790933	6
chr12	79790933	79790943	3
chr12	79790943	79790953	4
chr12	79790953	79790963	9
chr12	79790963	79790973	8
chr12	79790973	79790983	7
chr12	79790983	79790993	4
chr12	79790993	79791003	5
chr12	79791003	79791013	5
chr12	79791013	79791023	9
chr12	79791023	79791033	23
chr12	79791033	79791043	6
chr12	79791043	79791053	10
chr12	79791053	79791063	9
chr12	79791063	79791073	7
chr12	79791073	79791083	6
chr12	79791083	79791093	3
chr12	79791093	79791103	20
chr12	79791103	79791113	7
chr12	79791113	79791123	13
chr12	79791123	79791133	10
chr12	79791133	79791143	8
chr12	79791143	79791153	10
chr12	79791153	79791163	7
chr12	79791163	79791173	7
chr12	79791173	79791183	13
chr12	79791183	79791193	8
chr12	79791193	79791203	18
chr12	79791203	79791213	13
chr12	79791213	79791223	23
chr12	79791223	79791233	9
chr12	79791233	79791243	8
chr12	79791243	79791253	117
chr12	79791253	79791263	4
chr12	79791263	79791273	12
chr12	79791273	79791283	8
chr12	79791283	79791293	3
chr12	79791293	79791303	10
chr12	79791303	79791313	11
chr12	79791313	79791323	8
chr12	79791323	79791333	13
chr12	79791333	79791343	30
chr12	79791343	79791353	6
chr12	79791353	79791363	4
chr12	79791363	79791373	5
chr12	79791373	79791383	8
chr12	79791383	79791393	11
chr12	79791393	79791403	8
chr12	79791403	79791413	51
chr12	79791413	79791423	65
chr12	79791423	79791433	4
chr12	79791433	79791443	15
chr12	79791443	79791453	15
chr12	79791453	79791463	10
chr12	79791463	79791473	9
chr12	79791473	79791483	4
chr12	79791483	79791493	7
chr12	79791493	79791503	3
chr12	79791503	79791513	8
chr12	79791513	79791523	4
chr12	79791523	79791533	7
chr12	79791533	79791543	4
chr12	79791543	79791553	2
chr12	79791553	79791563	3
chr12	79791563	79791573	7
chr12	79791573	79791583	9
chr12	79791583	79791593	2
chr12	79791593	79791603	1
chr12	79791603	79791613	9
chr12	79791613	79791623	5
chr12	79791623	79791633	2
chr12	79791633	79791643	4
chr12	79791643	79791653	7
chr12	79791653	79791663	3
chr12	79791663	79791673	1
chr12	79791673	79791683	2
chr12	79791683	79791693	3
chr12	79791693	79791703	5
chr12	79791703	79791713	4
chr12	79791713	79791723	6
chr12	79791723	79791733	3
chr12	79791733	79791743	5
chr12	79791743	79791753	5
chr12	79791753	79791763	10
chr12	79791763	79791773	11
chr12	79791773	79791783	2
chr12	79791783	79791793	11
chr12	79791793	79791803	8
chr12	79791803	79791813	6
chr12	79791813	79791823	5
chr12	79791823	79791833	5
chr12	79791833	79791843	3
chr12	79791843	79791853	6
chr12	79791853	79791863	5
chr12	79791863	79791873	10
chr12	79791873	79791883	4
chr12	79791883	79791893	4
chr12	79791893	79791903	7
chr12	79791903	79791913	9
chr12	79791913	79791923	7
chr12	79791923	79791933	6
chr12	79791933	79791943	39
chr12	79791943	79791953	5
chr12	79791953	79791963	11
chr12	79791963	79791973	5
chr12	79791973	79791983	2
chr12	79791983	79791993	8
chr12	79791993	79792003	1
chr12	79792003	79792013	18
chr12	79792013	79792023	1
chr12	79792023	79792033	5
chr12	79792033	79792043	6
chr12	79792043	79792053	5
chr12	79792053	79792063	8
chr12	79792063	79792073	9
chr12	79792073	79792083	5
chr12	79792083	79792093	7
chr12	79792093	79792103	11
chr12	79792103	79792113	4
chr12	79792113	79792123	11
chr12	79792123	79792133	7
chr12	79792133	79792143	8
chr12	79792143	79792153	2
chr12	79792153	79792163	2
chr12	79792163	79792173	9
chr12	79792173	79792183	11
chr12	79792183	79792193	3
chr12	79792193	79792203	1
chr12	79792203	79792213	5
chr12	79792213	79792223	1
chr12	79792223	79792233	5
chr12	79792233	79792243	1
chr12	79792243	79792253	2
chr12	79792253	79792263	3
chr12	79792263	79792273	2
chr12	79792273	79792283	1
chr12	79792283	79792293	1
chr12	79792293	79792303	0
chr12	79792303	79792313	1
chr12	79792313	79792323	7
chr12	79792323	79792333	1
chr12	79792333	79792343	1
chr12	79792343	79792353	0
chr12	79792353	79792363	0
chr12	79792363	79792373	0
chr12	79792373	79792383	6
chr12	79792383	79792393	4
chr12	79792393	79792403	4
chr12	79792403	79792413	3
chr12	79792413	79792423	1
[truncated: 18,000 more rows]

## Sheet: Fig 6D- mut.all.windows
chr12	79772423	79772433	6
chr12	79772433	79772443	3
chr12	79772443	79772453	0
chr12	79772453	79772463	2
chr12	79772463	79772473	1
chr12	79772473	79772483	1
chr12	79772483	79772493	3
chr12	79772493	79772503	2
chr12	79772503	79772513	3
chr12	79772513	79772523	0
chr12	79772523	79772533	1
chr12	79772533	79772543	1
chr12	79772543	79772553	0
chr12	79772553	79772563	4
chr12	79772563	79772573	6
chr12	79772573	79772583	3
chr12	79772583	79772593	4
chr12	79772593	79772603	1
chr12	79772603	79772613	6
chr12	79772613	79772623	4
chr12	79772623	79772633	3
chr12	79772633	79772643	0
chr12	79772643	79772653	3
chr12	79772653	79772663	2
chr12	79772663	79772673	2
chr12	79772673	79772683	5
chr12	79772683	79772693	2
chr12	79772693	79772703	2
chr12	79772703	79772713	3
chr12	79772713	79772723	1
chr12	79772723	79772733	1
chr12	79772733	79772743	0
chr12	79772743	79772753	2
chr12	79772753	79772763	1
chr12	79772763	79772773	1
chr12	79772773	79772783	2
chr12	79772783	79772793	1
chr12	79772793	79772803	0
chr12	79772803	79772813	3
chr12	79772813	79772823	0
chr12	79772823	79772833	1
chr12	79772833	79772843	1
chr12	79772843	79772853	1
chr12	79772853	79772863	0
chr12	79772863	79772873	3
chr12	79772873	79772883	0
chr12	79772883	79772893	5
chr12	79772893	79772903	1
chr12	79772903	79772913	4
chr12	79772913	79772923	2
chr12	79772923	79772933	2
chr12	79772933	79772943	2
chr12	79772943	79772953	7
chr12	79772953	79772963	6
chr12	79772963	79772973	6
chr12	79772973	79772983	5
chr12	79772983	79772993	3
chr12	79772993	79773003	9
chr12	79773003	79773013	8
chr12	79773013	79773023	4
chr12	79773023	79773033	7
chr12	79773033	79773043	8
chr12	79773043	79773053	4
chr12	79773053	79773063	2
chr12	79773063	79773073	5
chr12	79773073	79773083	2
chr12	79773083	79773093	3
chr12	79773093	79773103	5
chr12	79773103	79773113	3
chr12	79773113	79773123	2
chr12	79773123	79773133	10
chr12	79773133	79773143	2
chr12	79773143	79773153	6
chr12	79773153	79773163	4
chr12	79773163	79773173	3
chr12	79773173	79773183	3
chr12	79773183	79773193	6
chr12	79773193	79773203	8
chr12	79773203	79773213	3
chr12	79773213	79773223	3
chr12	79773223	79773233	6
chr12	79773233	79773243	18
chr12	79773243	79773253	8
chr12	79773253	79773263	13
chr12	79773263	79773273	4
chr12	79773273	79773283	9
chr12	79773283	79773293	5
chr12	79773293	79773303	5
chr12	79773303	79773313	8
chr12	79773313	79773323	5
chr12	79773323	79773333	9
chr12	79773333	79773343	5
chr12	79773343	79773353	3
chr12	79773353	79773363	11
chr12	79773363	79773373	1
chr12	79773373	79773383	7
chr12	79773383	79773393	7
chr12	79773393	79773403	9
chr12	79773403	79773413	7
chr12	79773413	79773423	3
chr12	79773423	79773433	5
chr12	79773433	79773443	9
chr12	79773443	79773453	9
chr12	79773453	79773463	7
chr12	79773463	79773473	3
chr12	79773473	79773483	2
chr12	79773483	79773493	2
chr12	79773493	79773503	9
chr12	79773503	79773513	8
chr12	79773513	79773523	8
chr12	79773523	79773533	1
chr12	79773533	79773543	6
chr12	79773543	79773553	7
chr12	79773553	79773563	6
chr12	79773563	79773573	7
chr12	79773573	79773583	5
chr12	79773583	79773593	4
chr12	79773593	79773603	5
chr12	79773603	79773613	1
chr12	79773613	79773623	6
chr12	79773623	79773633	4
chr12	79773633	79773643	7
chr12	79773643	79773653	8
chr12	79773653	79773663	4
chr12	79773663	79773673	8
chr12	79773673	79773683	5
chr12	79773683	79773693	3
chr12	79773693	79773703	7
chr12	79773703	79773713	7
chr12	79773713	79773723	5
chr12	79773723	79773733	6
chr12	79773733	79773743	1
chr12	79773743	79773753	4
chr12	79773753	79773763	2
chr12	79773763	79773773	1
chr12	79773773	79773783	1
chr12	79773783	79773793	5
chr12	79773793	79773803	4
chr12	79773803	79773813	2
chr12	79773813	79773823	3
chr12	79773823	79773833	5
chr12	79773833	79773843	4
chr12	79773843	79773853	2
chr12	79773853	79773863	2
chr12	79773863	79773873	0
chr12	79773873	79773883	1
chr12	79773883	79773893	1
chr12	79773893	79773903	5
chr12	79773903	79773913	6
chr12	79773913	79773923	1
chr12	79773923	79773933	5
chr12	79773933	79773943	0
chr12	79773943	79773953	3
chr12	79773953	79773963	3
chr12	79773963	79773973	2
chr12	79773973	79773983	0
chr12	79773983	79773993	6
chr12	79773993	79774003	2
chr12	79774003	79774013	1
chr12	79774013	79774023	3
chr12	79774023	79774033	2
chr12	79774033	79774043	8
chr12	79774043	79774053	8
chr12	79774053	79774063	2
chr12	79774063	79774073	4
chr12	79774073	79774083	4
chr12	79774083	79774093	4
chr12	79774093	79774103	14
chr12	79774103	79774113	8
chr12	79774113	79774123	5
chr12	79774123	79774133	7
chr12	79774133	79774143	4
chr12	79774143	79774153	14
chr12	79774153	79774163	9
chr12	79774163	79774173	8
chr12	79774173	79774183	8
chr12	79774183	79774193	14
chr12	79774193	79774203	5
chr12	79774203	79774213	10
chr12	79774213	79774223	5
chr12	79774223	79774233	15
chr12	79774233	79774243	3
chr12	79774243	79774253	7
chr12	79774253	79774263	37
chr12	79774263	79774273	5
chr12	79774273	79774283	5
chr12	79774283	79774293	9
chr12	79774293	79774303	3
chr12	79774303	79774313	9
chr12	79774313	79774323	3
chr12	79774323	79774333	5
chr12	79774333	79774343	11
chr12	79774343	79774353	2
chr12	79774353	79774363	8
chr12	79774363	79774373	3
chr12	79774373	79774383	5
chr12	79774383	79774393	11
chr12	79774393	79774403	4
chr12	79774403	79774413	4
chr12	79774413	79774423	8
chr12	79774423	79774433	7
chr12	79774433	79774443	11
chr12	79774443	79774453	7
chr12	79774453	79774463	5
chr12	79774463	79774473	6
chr12	79774473	79774483	3
chr12	79774483	79774493	7
chr12	79774493	79774503	8
chr12	79774503	79774513	9
chr12	79774513	79774523	9
chr12	79774523	79774533	8
chr12	79774533	79774543	4
chr12	79774543	79774553	4
chr12	79774553	79774563	6
chr12	79774563	79774573	11
chr12	79774573	79774583	4
chr12	79774583	79774593	6
chr12	79774593	79774603	3
chr12	79774603	79774613	6
chr12	79774613	79774623	4
chr12	79774623	79774633	4
chr12	79774633	79774643	8
chr12	79774643	79774653	2
chr12	79774653	79774663	0
chr12	79774663	79774673	4
chr12	79774673	79774683	2
chr12	79774683	79774693	5
chr12	79774693	79774703	7
chr12	79774703	79774713	4
chr12	79774713	79774723	5
chr12	79774723	79774733	2
chr12	79774733	79774743	11
chr12	79774743	79774753	7
chr12	79774753	79774763	6
chr12	79774763	79774773	6
chr12	79774773	79774783	5
chr12	79774783	79774793	7
chr12	79774793	79774803	6
chr12	79774803	79774813	3
chr12	79774813	79774823	5
chr12	79774823	79774833	5
chr12	79774833	79774843	4
chr12	79774843	79774853	2
chr12	79774853	79774863	5
chr12	79774863	79774873	5
chr12	79774873	79774883	5
chr12	79774883	79774893	11
chr12	79774893	79774903	6
chr12	79774903	79774913	7
chr12	79774913	79774923	8
chr12	79774923	79774933	7
chr12	79774933	79774943	2
chr12	79774943	79774953	2
chr12	79774953	79774963	7
chr12	79774963	79774973	10
chr12	79774973	79774983	3
chr12	79774983	79774993	14
chr12	79774993	79775003	5
chr12	79775003	79775013	7
chr12	79775013	79775023	31
chr12	79775023	79775033	4
chr12	79775033	79775043	2
chr12	79775043	79775053	6
chr12	79775053	79775063	5
chr12	79775063	79775073	6
chr12	79775073	79775083	2
chr12	79775083	79775093	7
chr12	79775093	79775103	7
chr12	79775103	79775113	7
chr12	79775113	79775123	23
chr12	79775123	79775133	11
chr12	79775133	79775143	9
chr12	79775143	79775153	10
chr12	79775153	79775163	5
chr12	79775163	79775173	6
chr12	79775173	79775183	4
chr12	79775183	79775193	15
chr12	79775193	79775203	13
chr12	79775203	79775213	6
chr12	79775213	79775223	11
chr12	79775223	79775233	3
chr12	79775233	79775243	10
chr12	79775243	79775253	12
chr12	79775253	79775263	13
chr12	79775263	79775273	5
chr12	79775273	79775283	14
chr12	79775283	79775293	21
chr12	79775293	79775303	13
chr12	79775303	79775313	16
chr12	79775313	79775323	13
chr12	79775323	79775333	13
chr12	79775333	79775343	5
chr12	79775343	79775353	12
chr12	79775353	79775363	10
chr12	79775363	79775373	5
chr12	79775373	79775383	2
chr12	79775383	79775393	1
chr12	79775393	79775403	8
chr12	79775403	79775413	1
chr12	79775413	79775423	2
chr12	79775423	79775433	0
chr12	79775433	79775443	1
chr12	79775443	79775453	2
chr12	79775453	79775463	3
chr12	79775463	79775473	1
chr12	79775473	79775483	1
chr12	79775483	79775493	1
chr12	79775493	79775503	0
chr12	79775503	79775513	1
chr12	79775513	79775523	1
chr12	79775523	79775533	2
chr12	79775533	79775543	0
chr12	79775543	79775553	2
chr12	79775553	79775563	0
chr12	79775563	79775573	0
chr12	79775573	79775583	0
chr12	79775583	79775593	0
chr12	79775593	79775603	0
chr12	79775603	79775613	0
chr12	79775613	79775623	0
chr12	79775623	79775633	1
chr12	79775633	79775643	1
chr12	79775643	79775653	1
chr12	79775653	79775663	1
chr12	79775663	79775673	2
chr12	79775673	79775683	6
chr12	79775683	79775693	8
chr12	79775693	79775703	4
chr12	79775703	79775713	1
chr12	79775713	79775723	10
chr12	79775723	79775733	6
chr12	79775733	79775743	7
chr12	79775743	79775753	7
chr12	79775753	79775763	13
chr12	79775763	79775773	6
chr12	79775773	79775783	6
chr12	79775783	79775793	5
chr12	79775793	79775803	5
chr12	79775803	79775813	11
chr12	79775813	79775823	3
chr12	79775823	79775833	9
chr12	79775833	79775843	13
chr12	79775843	79775853	11
chr12	79775853	79775863	16
chr12	79775863	79775873	15
chr12	79775873	79775883	14
chr12	79775883	79775893	11
chr12	79775893	79775903	8
chr12	79775903	79775913	5
chr12	79775913	79775923	3
chr12	79775923	79775933	5
chr12	79775933	79775943	18
chr12	79775943	79775953	16
chr12	79775953	79775963	6
chr12	79775963	79775973	13
chr12	79775973	79775983	8
chr12	79775983	79775993	9
chr12	79775993	79776003	5
chr12	79776003	79776013	4
chr12	79776013	79776023	5
chr12	79776023	79776033	5
chr12	79776033	79776043	1
chr12	79776043	79776053	35
chr12	79776053	79776063	8
chr12	79776063	79776073	18
chr12	79776073	79776083	9
chr12	79776083	79776093	8
chr12	79776093	79776103	9
chr12	79776103	79776113	8
chr12	79776113	79776123	3
chr12	79776123	79776133	7
chr12	79776133	79776143	3
chr12	79776143	79776153	7
chr12	79776153	79776163	6
chr12	79776163	79776173	7
chr12	79776173	79776183	14
chr12	79776183	79776193	4
chr12	79776193	79776203	12
chr12	79776203	79776213	6
chr12	79776213	79776223	5
chr12	79776223	79776233	4
chr12	79776233	79776243	5
chr12	79776243	79776253	7
chr12	79776253	79776263	6
chr12	79776263	79776273	7
chr12	79776273	79776283	1
chr12	79776283	79776293	8
chr12	79776293	79776303	4
chr12	79776303	79776313	6
chr12	79776313	79776323	1
chr12	79776323	79776333	2
chr12	79776333	79776343	6
chr12	79776343	79776353	5
chr12	79776353	79776363	6
chr12	79776363	79776373	5
chr12	79776373	79776383	9
chr12	79776383	79776393	3
chr12	79776393	79776403	5
chr12	79776403	79776413	6
chr12	79776413	79776423	8
chr12	79776423	79776433	0
chr12	79776433	79776443	42
chr12	79776443	79776453	1
chr12	79776453	79776463	4
chr12	79776463	79776473	12
chr12	79776473	79776483	3
chr12	79776483	79776493	6
chr12	79776493	79776503	9
chr12	79776503	79776513	1
chr12	79776513	79776523	4
chr12	79776523	79776533	10
chr12	79776533	79776543	5
chr12	79776543	79776553	5
chr12	79776553	79776563	6
chr12	79776563	79776573	12
chr12	79776573	79776583	6
chr12	79776583	79776593	6
chr12	79776593	79776603	8
chr12	79776603	79776613	6
chr12	79776613	79776623	6
chr12	79776623	79776633	3
chr12	79776633	79776643	4
chr12	79776643	79776653	4
chr12	79776653	79776663	2
chr12	79776663	79776673	2
chr12	79776673	79776683	0
chr12	79776683	79776693	0
chr12	79776693	79776703	1
chr12	79776703	79776713	0
chr12	79776713	79776723	0
chr12	79776723	79776733	3
chr12	79776733	79776743	0
chr12	79776743	79776753	1
chr12	79776753	79776763	0
chr12	79776763	79776773	2
chr12	79776773	79776783	0
chr12	79776783	79776793	2
chr12	79776793	79776803	0
chr12	79776803	79776813	1
chr12	79776813	79776823	0
chr12	79776823	79776833	0
chr12	79776833	79776843	1
chr12	79776843	79776853	0
chr12	79776853	79776863	0
chr12	79776863	79776873	0
chr12	79776873	79776883	0
chr12	79776883	79776893	1
chr12	79776893	79776903	0
chr12	79776903	79776913	0
chr12	79776913	79776923	0
chr12	79776923	79776933	0
chr12	79776933	79776943	0
chr12	79776943	79776953	0
chr12	79776953	79776963	1
chr12	79776963	79776973	0
chr12	79776973	79776983	0
chr12	79776983	79776993	0
chr12	79776993	79777003	0
chr12	79777003	79777013	0
chr12	79777013	79777023	0
chr12	79777023	79777033	0
chr12	79777033	79777043	0
chr12	79777043	79777053	0
chr12	79777053	79777063	0
chr12	79777063	79777073	0
chr12	79777073	79777083	0
chr12	79777083	79777093	0
chr12	79777093	79777103	0
chr12	79777103	79777113	1
chr12	79777113	79777123	0
chr12	79777123	79777133	0
chr12	79777133	79777143	4
chr12	79777143	79777153	0
chr12	79777153	79777163	1
chr12	79777163	79777173	1
chr12	79777173	79777183	0
chr12	79777183	79777193	2
chr12	79777193	79777203	1
chr12	79777203	79777213	3
chr12	79777213	79777223	0
chr12	79777223	79777233	3
chr12	79777233	79777243	3
chr12	79777243	79777253	0
chr12	79777253	79777263	5
chr12	79777263	79777273	6
chr12	79777273	79777283	2
chr12	79777283	79777293	6
chr12	79777293	79777303	5
chr12	79777303	79777313	5
chr12	79777313	79777323	4
chr12	79777323	79777333	5
chr12	79777333	79777343	9
chr12	79777343	79777353	5
chr12	79777353	79777363	7
chr12	79777363	79777373	5
chr12	79777373	79777383	10
chr12	79777383	79777393	7
chr12	79777393	79777403	4
chr12	79777403	79777413	9
chr12	79777413	79777423	3
chr12	79777423	79777433	1
chr12	79777433	79777443	1
chr12	79777443	79777453	6
chr12	79777453	79777463	6
chr12	79777463	79777473	5
chr12	79777473	79777483	4
chr12	79777483	79777493	7
chr12	79777493	79777503	7
chr12	79777503	79777513	11
chr12	79777513	79777523	8
chr12	79777523	79777533	8
chr12	79777533	79777543	9
chr12	79777543	79777553	8
chr12	79777553	79777563	8
chr12	79777563	79777573	8
chr12	79777573	79777583	11
chr12	79777583	79777593	8
chr12	79777593	79777603	4
chr12	79777603	79777613	17
chr12	79777613	79777623	8
chr12	79777623	79777633	12
chr12	79777633	79777643	5
chr12	79777643	79777653	9
chr12	79777653	79777663	3
chr12	79777663	79777673	9
chr12	79777673	79777683	8
chr12	79777683	79777693	10
chr12	79777693	79777703	2
chr12	79777703	79777713	48
chr12	79777713	79777723	1
chr12	79777723	79777733	10
chr12	79777733	79777743	6
chr12	79777743	79777753	9
chr12	79777753	79777763	3
chr12	79777763	79777773	4
chr12	79777773	79777783	8
chr12	79777783	79777793	4
chr12	79777793	79777803	4
chr12	79777803	79777813	4
chr12	79777813	79777823	5
chr12	79777823	79777833	2
chr12	79777833	79777843	70
chr12	79777843	79777853	6
chr12	79777853	79777863	5
chr12	79777863	79777873	2
chr12	79777873	79777883	6
chr12	79777883	79777893	6
chr12	79777893	79777903	3
chr12	79777903	79777913	9
chr12	79777913	79777923	5
chr12	79777923	79777933	10
chr12	79777933	79777943	3
chr12	79777943	79777953	1
chr12	79777953	79777963	2
chr12	79777963	79777973	4
chr12	79777973	79777983	4
chr12	79777983	79777993	4
chr12	79777993	79778003	3
chr12	79778003	79778013	2
chr12	79778013	79778023	2
chr12	79778023	79778033	1
chr12	79778033	79778043	2
chr12	79778043	79778053	0
chr12	79778053	79778063	4
chr12	79778063	79778073	5
chr12	79778073	79778083	2
chr12	79778083	79778093	4
chr12	79778093	79778103	0
chr12	79778103	79778113	1
chr12	79778113	79778123	2
chr12	79778123	79778133	2
chr12	79778133	79778143	1
chr12	79778143	79778153	3
chr12	79778153	79778163	0
chr12	79778163	79778173	4
chr12	79778173	79778183	5
chr12	79778183	79778193	4
chr12	79778193	79778203	6
chr12	79778203	79778213	2
chr12	79778213	79778223	5
chr12	79778223	79778233	4
chr12	79778233	79778243	2
chr12	79778243	79778253	1
chr12	79778253	79778263	2
chr12	79778263	79778273	4
chr12	79778273	79778283	4
chr12	79778283	79778293	5
chr12	79778293	79778303	5
chr12	79778303	79778313	6
chr12	79778313	79778323	3
chr12	79778323	79778333	5
chr12	79778333	79778343	6
chr12	79778343	79778353	2
chr12	79778353	79778363	7
chr12	79778363	79778373	2
chr12	79778373	79778383	2
chr12	79778383	79778393	13
chr12	79778393	79778403	13
chr12	79778403	79778413	3
chr12	79778413	79778423	6
chr12	79778423	79778433	4
chr12	79778433	79778443	51
chr12	79778443	79778453	12
chr12	79778453	79778463	6
chr12	79778463	79778473	5
chr12	79778473	79778483	30
chr12	79778483	79778493	3
chr12	79778493	79778503	7
chr12	79778503	79778513	9
chr12	79778513	79778523	10
chr12	79778523	79778533	7
chr12	79778533	79778543	7
chr12	79778543	79778553	12
chr12	79778553	79778563	7
chr12	79778563	79778573	5
chr12	79778573	79778583	8
chr12	79778583	79778593	12
chr12	79778593	79778603	7
chr12	79778603	79778613	7
chr12	79778613	79778623	14
chr12	79778623	79778633	8
chr12	79778633	79778643	7
chr12	79778643	79778653	12
chr12	79778653	79778663	6
chr12	79778663	79778673	10
chr12	79778673	79778683	9
chr12	79778683	79778693	8
chr12	79778693	79778703	8
chr12	79778703	79778713	12
chr12	79778713	79778723	11
chr12	79778723	79778733	4
chr12	79778733	79778743	1
chr12	79778743	79778753	5
chr12	79778753	79778763	6
chr12	79778763	79778773	16
chr12	79778773	79778783	5
chr12	79778783	79778793	18
chr12	79778793	79778803	6
chr12	79778803	79778813	9
chr12	79778813	79778823	2
chr12	79778823	79778833	43
chr12	79778833	79778843	150
chr12	79778843	79778853	10
chr12	79778853	79778863	3
chr12	79778863	79778873	25
chr12	79778873	79778883	3
chr12	79778883	79778893	0
chr12	79778893	79778903	1
chr12	79778903	79778913	0
chr12	79778913	79778923	13
chr12	79778923	79778933	4
chr12	79778933	79778943	2
chr12	79778943	79778953	10
chr12	79778953	79778963	2
chr12	79778963	79778973	0
chr12	79778973	79778983	3
chr12	79778983	79778993	3
chr12	79778993	79779003	1
chr12	79779003	79779013	16
chr12	79779013	79779023	3
chr12	79779023	79779033	9
chr12	79779033	79779043	5
chr12	79779043	79779053	6
chr12	79779053	79779063	4
chr12	79779063	79779073	6
chr12	79779073	79779083	6
chr12	79779083	79779093	7
chr12	79779093	79779103	8
chr12	79779103	79779113	7
chr12	79779113	79779123	1
chr12	79779123	79779133	3
chr12	79779133	79779143	6
chr12	79779143	79779153	6
chr12	79779153	79779163	7
chr12	79779163	79779173	4
chr12	79779173	79779183	3
chr12	79779183	79779193	5
chr12	79779193	79779203	3
chr12	79779203	79779213	6
chr12	79779213	79779223	3
chr12	79779223	79779233	1
chr12	79779233	79779243	1
chr12	79779243	79779253	3
chr12	79779253	79779263	0
chr12	79779263	79779273	0
chr12	79779273	79779283	1
chr12	79779283	79779293	0
chr12	79779293	79779303	0
chr12	79779303	79779313	4
chr12	79779313	79779323	0
chr12	79779323	79779333	4
chr12	79779333	79779343	2
chr12	79779343	79779353	2
chr12	79779353	79779363	1
chr12	79779363	79779373	1
chr12	79779373	79779383	2
chr12	79779383	79779393	2
chr12	79779393	79779403	0
chr12	79779403	79779413	0
chr12	79779413	79779423	3
chr12	79779423	79779433	2
chr12	79779433	79779443	1
chr12	79779443	79779453	3
chr12	79779453	79779463	2
chr12	79779463	79779473	1
chr12	79779473	79779483	3
chr12	79779483	79779493	3
chr12	79779493	79779503	7
chr12	79779503	79779513	0
chr12	79779513	79779523	1
chr12	79779523	79779533	2
chr12	79779533	79779543	3
chr12	79779543	79779553	4
chr12	79779553	79779563	2
chr12	79779563	79779573	3
chr12	79779573	79779583	0
chr12	79779583	79779593	1
chr12	79779593	79779603	6
chr12	79779603	79779613	2
chr12	79779613	79779623	0
chr12	79779623	79779633	0
chr12	79779633	79779643	3
chr12	79779643	79779653	2
chr12	79779653	79779663	3
chr12	79779663	79779673	0
chr12	79779673	79779683	2
chr12	79779683	79779693	2
chr12	79779693	79779703	3
chr12	79779703	79779713	2
chr12	79779713	79779723	2
chr12	79779723	79779733	2
chr12	79779733	79779743	0
chr12	79779743	79779753	5
chr12	79779753	79779763	4
chr12	79779763	79779773	0
chr12	79779773	79779783	1
chr12	79779783	79779793	0
chr12	79779793	79779803	4
chr12	79779803	79779813	2
chr12	79779813	79779823	9
chr12	79779823	79779833	7
chr12	79779833	79779843	5
chr12	79779843	79779853	5
chr12	79779853	79779863	6
chr12	79779863	79779873	3
chr12	79779873	79779883	4
chr12	79779883	79779893	5
chr12	79779893	79779903	6
chr12	79779903	79779913	6
chr12	79779913	79779923	0
chr12	79779923	79779933	5
chr12	79779933	79779943	6
chr12	79779943	79779953	6
chr12	79779953	79779963	1
chr12	79779963	79779973	3
chr12	79779973	79779983	1
chr12	79779983	79779993	3
chr12	79779993	79780003	2
chr12	79780003	79780013	7
chr12	79780013	79780023	1
chr12	79780023	79780033	0
chr12	79780033	79780043	3
chr12	79780043	79780053	1
chr12	79780053	79780063	0
chr12	79780063	79780073	2
chr12	79780073	79780083	1
chr12	79780083	79780093	1
chr12	79780093	79780103	0
chr12	79780103	79780113	2
chr12	79780113	79780123	2
chr12	79780123	79780133	0
chr12	79780133	79780143	1
chr12	79780143	79780153	0
chr12	79780153	79780163	2
chr12	79780163	79780173	0
chr12	79780173	79780183	0
chr12	79780183	79780193	1
chr12	79780193	79780203	0
chr12	79780203	79780213	1
chr12	79780213	79780223	1
chr12	79780223	79780233	1
chr12	79780233	79780243	0
chr12	79780243	79780253	5
chr12	79780253	79780263	3
chr12	79780263	79780273	11
chr12	79780273	79780283	1
chr12	79780283	79780293	3
chr12	79780293	79780303	1
chr12	79780303	79780313	7
chr12	79780313	79780323	4
chr12	79780323	79780333	6
chr12	79780333	79780343	4
chr12	79780343	79780353	3
chr12	79780353	79780363	9
chr12	79780363	79780373	14
chr12	79780373	79780383	7
chr12	79780383	79780393	3
chr12	79780393	79780403	11
chr12	79780403	79780413	3
chr12	79780413	79780423	11
chr12	79780423	79780433	15
chr12	79780433	79780443	6
chr12	79780443	79780453	0
chr12	79780453	79780463	0
chr12	79780463	79780473	2
chr12	79780473	79780483	5
chr12	79780483	79780493	6
chr12	79780493	79780503	6
chr12	79780503	79780513	8
chr12	79780513	79780523	10
chr12	79780523	79780533	3
chr12	79780533	79780543	1
chr12	79780543	79780553	9
chr12	79780553	79780563	6
chr12	79780563	79780573	8
chr12	79780573	79780583	10
chr12	79780583	79780593	11
chr12	79780593	79780603	8
chr12	79780603	79780613	14
chr12	79780613	79780623	12
chr12	79780623	79780633	5
chr12	79780633	79780643	7
chr12	79780643	79780653	8
chr12	79780653	79780663	6
chr12	79780663	79780673	2
chr12	79780673	79780683	5
chr12	79780683	79780693	6
chr12	79780693	79780703	5
chr12	79780703	79780713	4
chr12	79780713	79780723	3
chr12	79780723	79780733	1
chr12	79780733	79780743	2
chr12	79780743	79780753	0
chr12	79780753	79780763	4
chr12	79780763	79780773	2
chr12	79780773	79780783	0
chr12	79780783	79780793	0
chr12	79780793	79780803	1
chr12	79780803	79780813	0
chr12	79780813	79780823	1
chr12	79780823	79780833	2
chr12	79780833	79780843	1
chr12	79780843	79780853	1
chr12	79780853	79780863	0
chr12	79780863	79780873	0
chr12	79780873	79780883	0
chr12	79780883	79780893	0
chr12	79780893	79780903	0
chr12	79780903	79780913	0
chr12	79780913	79780923	0
chr12	79780923	79780933	1
chr12	79780933	79780943	0
chr12	79780943	79780953	0
chr12	79780953	79780963	0
chr12	79780963	79780973	2
chr12	79780973	79780983	0
chr12	79780983	79780993	1
chr12	79780993	79781003	0
chr12	79781003	79781013	0
chr12	79781013	79781023	0
chr12	79781023	79781033	0
chr12	79781033	79781043	0
chr12	79781043	79781053	0
chr12	79781053	79781063	0
chr12	79781063	79781073	0
chr12	79781073	79781083	0
chr12	79781083	79781093	0
chr12	79781093	79781103	0
chr12	79781103	79781113	0
chr12	79781113	79781123	0
chr12	79781123	79781133	0
chr12	79781133	79781143	0
chr12	79781143	79781153	0
chr12	79781153	79781163	0
chr12	79781163	79781173	0
chr12	79781173	79781183	0
chr12	79781183	79781193	0
chr12	79781193	79781203	0
chr12	79781203	79781213	0
chr12	79781213	79781223	0
chr12	79781223	79781233	0
chr12	79781233	79781243	0
chr12	79781243	79781253	0
chr12	79781253	79781263	0
chr12	79781263	79781273	3
chr12	79781273	79781283	0
chr12	79781283	79781293	0
chr12	79781293	79781303	0
chr12	79781303	79781313	0
chr12	79781313	79781323	0
chr12	79781323	79781333	1
chr12	79781333	79781343	0
chr12	79781343	79781353	0
chr12	79781353	79781363	1
chr12	79781363	79781373	2
chr12	79781373	79781383	1
chr12	79781383	79781393	1
chr12	79781393	79781403	0
chr12	79781403	79781413	0
chr12	79781413	79781423	2
chr12	79781423	79781433	3
chr12	79781433	79781443	1
chr12	79781443	79781453	0
chr12	79781453	79781463	3
chr12	79781463	79781473	2
chr12	79781473	79781483	2
chr12	79781483	79781493	2
chr12	79781493	79781503	6
chr12	79781503	79781513	4
chr12	79781513	79781523	9
chr12	79781523	79781533	3
chr12	79781533	79781543	0
chr12	79781543	79781553	10
chr12	79781553	79781563	5
chr12	79781563	79781573	12
chr12	79781573	79781583	3
chr12	79781583	79781593	14
chr12	79781593	79781603	4
chr12	79781603	79781613	5
chr12	79781613	79781623	4
chr12	79781623	79781633	5
chr12	79781633	79781643	1
chr12	79781643	79781653	2
chr12	79781653	79781663	0
chr12	79781663	79781673	25
chr12	79781673	79781683	1
chr12	79781683	79781693	4
chr12	79781693	79781703	14
chr12	79781703	79781713	3
chr12	79781713	79781723	69
chr12	79781723	79781733	3
chr12	79781733	79781743	1
chr12	79781743	79781753	4
chr12	79781753	79781763	5
chr12	79781763	79781773	9
chr12	79781773	79781783	8
chr12	79781783	79781793	8
chr12	79781793	79781803	9
chr12	79781803	79781813	4
chr12	79781813	79781823	2
chr12	79781823	79781833	1
chr12	79781833	79781843	0
chr12	79781843	79781853	8
chr12	79781853	79781863	2
chr12	79781863	79781873	3
chr12	79781873	79781883	6
chr12	79781883	79781893	5
chr12	79781893	79781903	2
chr12	79781903	79781913	3
chr12	79781913	79781923	2
chr12	79781923	79781933	4
chr12	79781933	79781943	1
chr12	79781943	79781953	1
chr12	79781953	79781963	1
chr12	79781963	79781973	1
chr12	79781973	79781983	2
chr12	79781983	79781993	3
chr12	79781993	79782003	2
chr12	79782003	79782013	1
chr12	79782013	79782023	2
chr12	79782023	79782033	1
chr12	79782033	79782043	2
chr12	79782043	79782053	3
chr12	79782053	79782063	0
chr12	79782063	79782073	4
chr12	79782073	79782083	1
chr12	79782083	79782093	6
chr12	79782093	79782103	1
chr12	79782103	79782113	8
chr12	79782113	79782123	5
chr12	79782123	79782133	4
chr12	79782133	79782143	2
chr12	79782143	79782153	0
chr12	79782153	79782163	7
chr12	79782163	79782173	4
chr12	79782173	79782183	4
chr12	79782183	79782193	9
chr12	79782193	79782203	6
chr12	79782203	79782213	3
chr12	79782213	79782223	1
chr12	79782223	79782233	6
chr12	79782233	79782243	0
chr12	79782243	79782253	0
chr12	79782253	79782263	8
chr12	79782263	79782273	2
chr12	79782273	79782283	7
chr12	79782283	79782293	3
chr12	79782293	79782303	8
chr12	79782303	79782313	3
chr12	79782313	79782323	16
chr12	79782323	79782333	8
chr12	79782333	79782343	22
chr12	79782343	79782353	19
chr12	79782353	79782363	6
chr12	79782363	79782373	8
chr12	79782373	79782383	6
chr12	79782383	79782393	2
chr12	79782393	79782403	34
chr12	79782403	79782413	14
chr12	79782413	79782423	2
chr12	79782423	79782433	4
chr12	79782433	79782443	14
chr12	79782443	79782453	44
chr12	79782453	79782463	4
chr12	79782463	79782473	3
chr12	79782473	79782483	8
chr12	79782483	79782493	19
chr12	79782493	79782503	11
chr12	79782503	79782513	7
chr12	79782513	79782523	11
chr12	79782523	79782533	10
chr12	79782533	79782543	5
chr12	79782543	79782553	9
chr12	79782553	79782563	6
chr12	79782563	79782573	16
chr12	79782573	79782583	6
chr12	79782583	79782593	5
chr12	79782593	79782603	4
chr12	79782603	79782613	6
chr12	79782613	79782623	10
chr12	79782623	79782633	3
chr12	79782633	79782643	9
chr12	79782643	79782653	29
chr12	79782653	79782663	7
chr12	79782663	79782673	10
chr12	79782673	79782683	4
chr12	79782683	79782693	10
chr12	79782693	79782703	7
chr12	79782703	79782713	4
chr12	79782713	79782723	11
chr12	79782723	79782733	5
chr12	79782733	79782743	8
chr12	79782743	79782753	12
chr12	79782753	79782763	14
chr12	79782763	79782773	3
chr12	79782773	79782783	8
chr12	79782783	79782793	13
chr12	79782793	79782803	8
chr12	79782803	79782813	7
chr12	79782813	79782823	8
chr12	79782823	79782833	12
chr12	79782833	79782843	9
chr12	79782843	79782853	6
chr12	79782853	79782863	7
chr12	79782863	79782873	5
chr12	79782873	79782883	6
chr12	79782883	79782893	10
chr12	79782893	79782903	8
chr12	79782903	79782913	3
chr12	79782913	79782923	4
chr12	79782923	79782933	7
chr12	79782933	79782943	4
chr12	79782943	79782953	5
chr12	79782953	79782963	12
chr12	79782963	79782973	10
chr12	79782973	79782983	6
chr12	79782983	79782993	3
chr12	79782993	79783003	1
chr12	79783003	79783013	0
chr12	79783013	79783023	2
chr12	79783023	79783033	2
chr12	79783033	79783043	8
chr12	79783043	79783053	4
chr12	79783053	79783063	4
chr12	79783063	79783073	10
chr12	79783073	79783083	3
chr12	79783083	79783093	3
chr12	79783093	79783103	7
chr12	79783103	79783113	6
chr12	79783113	79783123	5
chr12	79783123	79783133	13
chr12	79783133	79783143	7
chr12	79783143	79783153	2
chr12	79783153	79783163	5
chr12	79783163	79783173	5
chr12	79783173	79783183	2
chr12	79783183	79783193	2
chr12	79783193	79783203	5
chr12	79783203	79783213	6
chr12	79783213	79783223	4
chr12	79783223	79783233	3
chr12	79783233	79783243	1
chr12	79783243	79783253	1
chr12	79783253	79783263	4
chr12	79783263	79783273	3
chr12	79783273	79783283	0
chr12	79783283	79783293	8
chr12	79783293	79783303	10
chr12	79783303	79783313	5
chr12	79783313	79783323	2
chr12	79783323	79783333	6
chr12	79783333	79783343	1
chr12	79783343	79783353	2
chr12	79783353	79783363	1
chr12	79783363	79783373	7
chr12	79783373	79783383	8
chr12	79783383	79783393	6
chr12	79783393	79783403	3
chr12	79783403	79783413	4
chr12	79783413	79783423	3
chr12	79783423	79783433	2
chr12	79783433	79783443	2
chr12	79783443	79783453	1
chr12	79783453	79783463	2
chr12	79783463	79783473	6
chr12	79783473	79783483	2
chr12	79783483	79783493	1
chr12	79783493	79783503	3
chr12	79783503	79783513	1
chr12	79783513	79783523	1
chr12	79783523	79783533	7
chr12	79783533	79783543	2
chr12	79783543	79783553	7
chr12	79783553	79783563	1
chr12	79783563	79783573	1
chr12	79783573	79783583	3
chr12	79783583	79783593	5
chr12	79783593	79783603	5
chr12	79783603	79783613	4
chr12	79783613	79783623	4
chr12	79783623	79783633	4
chr12	79783633	79783643	2
chr12	79783643	79783653	4
chr12	79783653	79783663	3
chr12	79783663	79783673	3
chr12	79783673	79783683	2
chr12	79783683	79783693	1
chr12	79783693	79783703	7
chr12	79783703	79783713	7
chr12	79783713	79783723	4
chr12	79783723	79783733	18
chr12	79783733	79783743	18
chr12	79783743	79783753	3
chr12	79783753	79783763	6
chr12	79783763	79783773	6
chr12	79783773	79783783	46
chr12	79783783	79783793	2
chr12	79783793	79783803	2
chr12	79783803	79783813	15
chr12	79783813	79783823	4
chr12	79783823	79783833	2
chr12	79783833	79783843	5
chr12	79783843	79783853	4
chr12	79783853	79783863	8
chr12	79783863	79783873	3
chr12	79783873	79783883	11
chr12	79783883	79783893	4
chr12	79783893	79783903	9
chr12	79783903	79783913	4
chr12	79783913	79783923	3
chr12	79783923	79783933	3
chr12	79783933	79783943	16
chr12	79783943	79783953	26
chr12	79783953	79783963	20
chr12	79783963	79783973	6
chr12	79783973	79783983	2
chr12	79783983	79783993	6
chr12	79783993	79784003	4
chr12	79784003	79784013	5
chr12	79784013	79784023	4
chr12	79784023	79784033	6
chr12	79784033	79784043	2
chr12	79784043	79784053	3
chr12	79784053	79784063	10
chr12	79784063	79784073	1
chr12	79784073	79784083	6
chr12	79784083	79784093	2
chr12	79784093	79784103	2
chr12	79784103	79784113	6
chr12	79784113	79784123	7
chr12	79784123	79784133	5
chr12	79784133	79784143	0
chr12	79784143	79784153	0
chr12	79784153	79784163	2
chr12	79784163	79784173	0
chr12	79784173	79784183	2
chr12	79784183	79784193	4
chr12	79784193	79784203	9
chr12	79784203	79784213	1
chr12	79784213	79784223	0
chr12	79784223	79784233	2
chr12	79784233	79784243	0
chr12	79784243	79784253	1
chr12	79784253	79784263	0
chr12	79784263	79784273	2
chr12	79784273	79784283	3
chr12	79784283	79784293	5
chr12	79784293	79784303	3
chr12	79784303	79784313	2
chr12	79784313	79784323	3
chr12	79784323	79784333	2
chr12	79784333	79784343	5
chr12	79784343	79784353	3
chr12	79784353	79784363	1
chr12	79784363	79784373	7
chr12	79784373	79784383	3
chr12	79784383	79784393	5
chr12	79784393	79784403	3
chr12	79784403	79784413	1
chr12	79784413	79784423	4
chr12	79784423	79784433	4
chr12	79784433	79784443	8
chr12	79784443	79784453	1
chr12	79784453	79784463	2
chr12	79784463	79784473	1
chr12	79784473	79784483	6
chr12	79784483	79784493	5
chr12	79784493	79784503	5
chr12	79784503	79784513	2
chr12	79784513	79784523	11
chr12	79784523	79784533	6
chr12	79784533	79784543	8
chr12	79784543	79784553	3
chr12	79784553	79784563	3
chr12	79784563	79784573	0
chr12	79784573	79784583	5
chr12	79784583	79784593	4
chr12	79784593	79784603	5
chr12	79784603	79784613	0
chr12	79784613	79784623	2
chr12	79784623	79784633	2
chr12	79784633	79784643	5
chr12	79784643	79784653	1
chr12	79784653	79784663	5
chr12	79784663	79784673	7
chr12	79784673	79784683	1
chr12	79784683	79784693	0
chr12	79784693	79784703	0
chr12	79784703	79784713	1
chr12	79784713	79784723	1
chr12	79784723	79784733	0
chr12	79784733	79784743	1
chr12	79784743	79784753	2
chr12	79784753	79784763	2
chr12	79784763	79784773	4
chr12	79784773	79784783	4
chr12	79784783	79784793	3
chr12	79784793	79784803	0
chr12	79784803	79784813	4
chr12	79784813	79784823	3
chr12	79784823	79784833	3
chr12	79784833	79784843	4
chr12	79784843	79784853	10
chr12	79784853	79784863	3
chr12	79784863	79784873	2
chr12	79784873	79784883	10
chr12	79784883	79784893	5
chr12	79784893	79784903	2
chr12	79784903	79784913	14
chr12	79784913	79784923	4
chr12	79784923	79784933	5
chr12	79784933	79784943	2
chr12	79784943	79784953	4
chr12	79784953	79784963	2
chr12	79784963	79784973	5
chr12	79784973	79784983	3
chr12	79784983	79784993	3
chr12	79784993	79785003	3
chr12	79785003	79785013	1
chr12	79785013	79785023	1
chr12	79785023	79785033	2
chr12	79785033	79785043	8
chr12	79785043	79785053	4
chr12	79785053	79785063	0
chr12	79785063	79785073	2
chr12	79785073	79785083	9
chr12	79785083	79785093	3
chr12	79785093	79785103	6
chr12	79785103	79785113	8
chr12	79785113	79785123	5
chr12	79785123	79785133	5
chr12	79785133	79785143	3
chr12	79785143	79785153	6
chr12	79785153	79785163	4
chr12	79785163	79785173	6
chr12	79785173	79785183	5
chr12	79785183	79785193	4
chr12	79785193	79785203	6
chr12	79785203	79785213	4
chr12	79785213	79785223	9
chr12	79785223	79785233	1
chr12	79785233	79785243	8
chr12	79785243	79785253	6
chr12	79785253	79785263	5
chr12	79785263	79785273	7
chr12	79785273	79785283	12
chr12	79785283	79785293	6
chr12	79785293	79785303	7
chr12	79785303	79785313	1
chr12	79785313	79785323	2
chr12	79785323	79785333	3
chr12	79785333	79785343	3
chr12	79785343	79785353	4
chr12	79785353	79785363	7
chr12	79785363	79785373	3
chr12	79785373	79785383	2
chr12	79785383	79785393	3
chr12	79785393	79785403	4
chr12	79785403	79785413	4
chr12	79785413	79785423	6
chr12	79785423	79785433	2
chr12	79785433	79785443	4
chr12	79785443	79785453	2
chr12	79785453	79785463	9
chr12	79785463	79785473	6
chr12	79785473	79785483	8
chr12	79785483	79785493	3
chr12	79785493	79785503	4
chr12	79785503	79785513	9
chr12	79785513	79785523	2
chr12	79785523	79785533	5
chr12	79785533	79785543	3
chr12	79785543	79785553	5
chr12	79785553	79785563	7
chr12	79785563	79785573	4
chr12	79785573	79785583	5
chr12	79785583	79785593	1
chr12	79785593	79785603	1
chr12	79785603	79785613	7
chr12	79785613	79785623	8
chr12	79785623	79785633	6
chr12	79785633	79785643	7
chr12	79785643	79785653	5
chr12	79785653	79785663	10
chr12	79785663	79785673	10
chr12	79785673	79785683	3
chr12	79785683	79785693	1
chr12	79785693	79785703	5
chr12	79785703	79785713	3
chr12	79785713	79785723	12
chr12	79785723	79785733	10
chr12	79785733	79785743	8
chr12	79785743	79785753	1
chr12	79785753	79785763	6
chr12	79785763	79785773	2
chr12	79785773	79785783	7
chr12	79785783	79785793	1
chr12	79785793	79785803	4
chr12	79785803	79785813	8
chr12	79785813	79785823	1
chr12	79785823	79785833	2
chr12	79785833	79785843	0
chr12	79785843	79785853	1
chr12	79785853	79785863	1
chr12	79785863	79785873	0
chr12	79785873	79785883	1
chr12	79785883	79785893	1
chr12	79785893	79785903	1
chr12	79785903	79785913	0
chr12	79785913	79785923	0
chr12	79785923	79785933	1
chr12	79785933	79785943	1
chr12	79785943	79785953	0
chr12	79785953	79785963	0
chr12	79785963	79785973	1
chr12	79785973	79785983	0
chr12	79785983	79785993	1
chr12	79785993	79786003	0
chr12	79786003	79786013	1
chr12	79786013	79786023	0
chr12	79786023	79786033	6
chr12	79786033	79786043	3
chr12	79786043	79786053	0
chr12	79786053	79786063	9
chr12	79786063	79786073	2
chr12	79786073	79786083	2
chr12	79786083	79786093	4
chr12	79786093	79786103	3
chr12	79786103	79786113	4
chr12	79786113	79786123	4
chr12	79786123	79786133	4
chr12	79786133	79786143	7
chr12	79786143	79786153	6
chr12	79786153	79786163	8
chr12	79786163	79786173	5
chr12	79786173	79786183	7
chr12	79786183	79786193	5
chr12	79786193	79786203	4
chr12	79786203	79786213	9
chr12	79786213	79786223	9
chr12	79786223	79786233	10
chr12	79786233	79786243	6
chr12	79786243	79786253	5
chr12	79786253	79786263	9
chr12	79786263	79786273	6
chr12	79786273	79786283	1
chr12	79786283	79786293	0
chr12	79786293	79786303	1
chr12	79786303	79786313	6
chr12	79786313	79786323	8
chr12	79786323	79786333	8
chr12	79786333	79786343	8
chr12	79786343	79786353	5
chr12	79786353	79786363	11
chr12	79786363	79786373	11
chr12	79786373	79786383	5
chr12	79786383	79786393	9
chr12	79786393	79786403	8
chr12	79786403	79786413	6
chr12	79786413	79786423	8
chr12	79786423	79786433	9
chr12	79786433	79786443	1
chr12	79786443	79786453	4
chr12	79786453	79786463	4
chr12	79786463	79786473	8
chr12	79786473	79786483	5
chr12	79786483	79786493	3
chr12	79786493	79786503	0
chr12	79786503	79786513	4
chr12	79786513	79786523	4
chr12	79786523	79786533	2
chr12	79786533	79786543	3
chr12	79786543	79786553	0
chr12	79786553	79786563	3
chr12	79786563	79786573	4
chr12	79786573	79786583	0
chr12	79786583	79786593	0
chr12	79786593	79786603	0
chr12	79786603	79786613	1
chr12	79786613	79786623	0
chr12	79786623	79786633	1
chr12	79786633	79786643	0
chr12	79786643	79786653	1
chr12	79786653	79786663	0
chr12	79786663	79786673	0
chr12	79786673	79786683	0
chr12	79786683	79786693	0
chr12	79786693	79786703	0
chr12	79786703	79786713	1
chr12	79786713	79786723	0
chr12	79786723	79786733	0
chr12	79786733	79786743	0
chr12	79786743	79786753	0
chr12	79786753	79786763	0
chr12	79786763	79786773	0
chr12	79786773	79786783	0
chr12	79786783	79786793	0
chr12	79786793	79786803	0
chr12	79786803	79786813	0
chr12	79786813	79786823	0
chr12	79786823	79786833	0
chr12	79786833	79786843	0
chr12	79786843	79786853	1
chr12	79786853	79786863	2
chr12	79786863	79786873	1
chr12	79786873	79786883	0
chr12	79786883	79786893	0
chr12	79786893	79786903	1
chr12	79786903	79786913	1
chr12	79786913	79786923	2
chr12	79786923	79786933	7
chr12	79786933	79786943	2
chr12	79786943	79786953	1
chr12	79786953	79786963	5
chr12	79786963	79786973	5
chr12	79786973	79786983	9
chr12	79786983	79786993	6
chr12	79786993	79787003	4
chr12	79787003	79787013	1
chr12	79787013	79787023	1
chr12	79787023	79787033	7
chr12	79787033	79787043	8
chr12	79787043	79787053	5
chr12	79787053	79787063	8
chr12	79787063	79787073	6
chr12	79787073	79787083	3
chr12	79787083	79787093	6
chr12	79787093	79787103	4
chr12	79787103	79787113	2
chr12	79787113	79787123	16
chr12	79787123	79787133	4
chr12	79787133	79787143	4
chr12	79787143	79787153	1
chr12	79787153	79787163	1
chr12	79787163	79787173	12
chr12	79787173	79787183	0
chr12	79787183	79787193	1
chr12	79787193	79787203	14
chr12	79787203	79787213	4
chr12	79787213	79787223	5
chr12	79787223	79787233	8
chr12	79787233	79787243	8
chr12	79787243	79787253	12
chr12	79787253	79787263	9
chr12	79787263	79787273	6
chr12	79787273	79787283	7
chr12	79787283	79787293	7
chr12	79787293	79787303	8
chr12	79787303	79787313	15
chr12	79787313	79787323	6
chr12	79787323	79787333	8
chr12	79787333	79787343	4
chr12	79787343	79787353	6
chr12	79787353	79787363	5
chr12	79787363	79787373	7
chr12	79787373	79787383	5
chr12	79787383	79787393	11
chr12	79787393	79787403	5
chr12	79787403	79787413	1
chr12	79787413	79787423	2
chr12	79787423	79787433	7
chr12	79787433	79787443	7
chr12	79787443	79787453	0
chr12	79787453	79787463	1
chr12	79787463	79787473	0
chr12	79787473	79787483	0
chr12	79787483	79787493	4
chr12	79787493	79787503	0
chr12	79787503	79787513	0
chr12	79787513	79787523	1
chr12	79787523	79787533	2
chr12	79787533	79787543	0
chr12	79787543	79787553	0
chr12	79787553	79787563	0
chr12	79787563	79787573	1
chr12	79787573	79787583	0
chr12	79787583	79787593	0
chr12	79787593	79787603	0
chr12	79787603	79787613	0
chr12	79787613	79787623	0
chr12	79787623	79787633	0
chr12	79787633	79787643	0
chr12	79787643	79787653	0
chr12	79787653	79787663	0
chr12	79787663	79787673	0
chr12	79787673	79787683	0
chr12	79787683	79787693	0
chr12	79787693	79787703	0
chr12	79787703	79787713	0
chr12	79787713	79787723	0
chr12	79787723	79787733	0
chr12	79787733	79787743	0
chr12	79787743	79787753	0
chr12	79787753	79787763	0
chr12	79787763	79787773	0
chr12	79787773	79787783	0
chr12	79787783	79787793	0
chr12	79787793	79787803	0
chr12	79787803	79787813	0
chr12	79787813	79787823	0
chr12	79787823	79787833	0
chr12	79787833	79787843	0
chr12	79787843	79787853	0
chr12	79787853	79787863	0
chr12	79787863	79787873	0
chr12	79787873	79787883	0
chr12	79787883	79787893	0
chr12	79787893	79787903	0
chr12	79787903	79787913	0
chr12	79787913	79787923	0
chr12	79787923	79787933	1
chr12	79787933	79787943	0
chr12	79787943	79787953	2
chr12	79787953	79787963	0
chr12	79787963	79787973	1
chr12	79787973	79787983	2
chr12	79787983	79787993	0
chr12	79787993	79788003	2
chr12	79788003	79788013	2
chr12	79788013	79788023	2
chr12	79788023	79788033	3
chr12	79788033	79788043	1
chr12	79788043	79788053	3
chr12	79788053	79788063	4
chr12	79788063	79788073	6
chr12	79788073	79788083	3
chr12	79788083	79788093	7
chr12	79788093	79788103	2
chr12	79788103	79788113	5
chr12	79788113	79788123	7
chr12	79788123	79788133	7
chr12	79788133	79788143	14
chr12	79788143	79788153	6
chr12	79788153	79788163	5
chr12	79788163	79788173	17
chr12	79788173	79788183	19
chr12	79788183	79788193	7
chr12	79788193	79788203	16
chr12	79788203	79788213	6
chr12	79788213	79788223	3
chr12	79788223	79788233	8
chr12	79788233	79788243	7
chr12	79788243	79788253	7
chr12	79788253	79788263	4
chr12	79788263	79788273	10
chr12	79788273	79788283	5
chr12	79788283	79788293	12
chr12	79788293	79788303	9
chr12	79788303	79788313	2
chr12	79788313	79788323	0
chr12	79788323	79788333	7
chr12	79788333	79788343	6
chr12	79788343	79788353	8
chr12	79788353	79788363	12
chr12	79788363	79788373	8
chr12	79788373	79788383	9
chr12	79788383	79788393	8
chr12	79788393	79788403	5
chr12	79788403	79788413	6
chr12	79788413	79788423	7
chr12	79788423	79788433	3
chr12	79788433	79788443	2
chr12	79788443	79788453	8
chr12	79788453	79788463	8
chr12	79788463	79788473	7
chr12	79788473	79788483	2
chr12	79788483	79788493	1
chr12	79788493	79788503	1
chr12	79788503	79788513	5
chr12	79788513	79788523	5
chr12	79788523	79788533	1
chr12	79788533	79788543	3
chr12	79788543	79788553	5
chr12	79788553	79788563	0
chr12	79788563	79788573	1
chr12	79788573	79788583	2
chr12	79788583	79788593	0
chr12	79788593	79788603	0
chr12	79788603	79788613	1
chr12	79788613	79788623	1
chr12	79788623	79788633	0
chr12	79788633	79788643	0
chr12	79788643	79788653	1
chr12	79788653	79788663	1
chr12	79788663	79788673	0
chr12	79788673	79788683	1
chr12	79788683	79788693	0
chr12	79788693	79788703	1
chr12	79788703	79788713	1
chr12	79788713	79788723	2
chr12	79788723	79788733	5
chr12	79788733	79788743	1
chr12	79788743	79788753	2
chr12	79788753	79788763	5
chr12	79788763	79788773	6
chr12	79788773	79788783	4
chr12	79788783	79788793	5
chr12	79788793	79788803	6
chr12	79788803	79788813	4
chr12	79788813	79788823	14
chr12	79788823	79788833	10
chr12	79788833	79788843	5
chr12	79788843	79788853	4
chr12	79788853	79788863	4
chr12	79788863	79788873	4
chr12	79788873	79788883	13
chr12	79788883	79788893	4
chr12	79788893	79788903	1
chr12	79788903	79788913	3
chr12	79788913	79788923	5
chr12	79788923	79788933	12
chr12	79788933	79788943	5
chr12	79788943	79788953	8
chr12	79788953	79788963	6
chr12	79788963	79788973	5
chr12	79788973	79788983	13
chr12	79788983	79788993	2
chr12	79788993	79789003	10
chr12	79789003	79789013	6
chr12	79789013	79789023	5
chr12	79789023	79789033	13
chr12	79789033	79789043	1
chr12	79789043	79789053	3
chr12	79789053	79789063	9
chr12	79789063	79789073	8
chr12	79789073	79789083	11
chr12	79789083	79789093	9
chr12	79789093	79789103	20
chr12	79789103	79789113	10
chr12	79789113	79789123	8
chr12	79789123	79789133	7
chr12	79789133	79789143	6
chr12	79789143	79789153	6
chr12	79789153	79789163	13
chr12	79789163	79789173	6
chr12	79789173	79789183	5
chr12	79789183	79789193	1
chr12	79789193	79789203	2
chr12	79789203	79789213	12
chr12	79789213	79789223	6
chr12	79789223	79789233	4
chr12	79789233	79789243	26
chr12	79789243	79789253	4
chr12	79789253	79789263	3
chr12	79789263	79789273	5
chr12	79789273	79789283	11
chr12	79789283	79789293	6
chr12	79789293	79789303	8
chr12	79789303	79789313	6
chr12	79789313	79789323	5
chr12	79789323	79789333	9
chr12	79789333	79789343	9
chr12	79789343	79789353	13
chr12	79789353	79789363	6
chr12	79789363	79789373	4
chr12	79789373	79789383	7
chr12	79789383	79789393	3
chr12	79789393	79789403	13
chr12	79789403	79789413	4
chr12	79789413	79789423	5
chr12	79789423	79789433	2
chr12	79789433	79789443	6
chr12	79789443	79789453	3
chr12	79789453	79789463	12
chr12	79789463	79789473	9
chr12	79789473	79789483	4
chr12	79789483	79789493	0
chr12	79789493	79789503	9
chr12	79789503	79789513	4
chr12	79789513	79789523	8
chr12	79789523	79789533	7
chr12	79789533	79789543	4
chr12	79789543	79789553	0
chr12	79789553	79789563	7
chr12	79789563	79789573	3
chr12	79789573	79789583	0
chr12	79789583	79789593	4
chr12	79789593	79789603	0
chr12	79789603	79789613	3
chr12	79789613	79789623	1
chr12	79789623	79789633	2
chr12	79789633	79789643	1
chr12	79789643	79789653	0
chr12	79789653	79789663	0
chr12	79789663	79789673	0
chr12	79789673	79789683	0
chr12	79789683	79789693	0
chr12	79789693	79789703	0
chr12	79789703	79789713	0
chr12	79789713	79789723	0
chr12	79789723	79789733	1
chr12	79789733	79789743	0
chr12	79789743	79789753	0
chr12	79789753	79789763	0
chr12	79789763	79789773	0
chr12	79789773	79789783	0
chr12	79789783	79789793	0
chr12	79789793	79789803	0
chr12	79789803	79789813	0
chr12	79789813	79789823	0
chr12	79789823	79789833	1
chr12	79789833	79789843	0
chr12	79789843	79789853	0
chr12	79789853	79789863	0
chr12	79789863	79789873	0
chr12	79789873	79789883	0
chr12	79789883	79789893	0
chr12	79789893	79789903	0
chr12	79789903	79789913	0
chr12	79789913	79789923	0
chr12	79789923	79789933	0
chr12	79789933	79789943	0
chr12	79789943	79789953	0
chr12	79789953	79789963	0
chr12	79789963	79789973	0
chr12	79789973	79789983	0
chr12	79789983	79789993	1
chr12	79789993	79790003	0
chr12	79790003	79790013	0
chr12	79790013	79790023	0
chr12	79790023	79790033	0
chr12	79790033	79790043	0
chr12	79790043	79790053	0
chr12	79790053	79790063	0
chr12	79790063	79790073	1
chr12	79790073	79790083	1
chr12	79790083	79790093	2
chr12	79790093	79790103	2
chr12	79790103	79790113	1
chr12	79790113	79790123	0
chr12	79790123	79790133	4
chr12	79790133	79790143	0
chr12	79790143	79790153	0
chr12	79790153	79790163	0
chr12	79790163	79790173	4
chr12	79790173	79790183	5
chr12	79790183	79790193	0
chr12	79790193	79790203	0
chr12	79790203	79790213	0
chr12	79790213	79790223	0
chr12	79790223	79790233	4
chr12	79790233	79790243	3
chr12	79790243	79790253	1
chr12	79790253	79790263	5
chr12	79790263	79790273	3
chr12	79790273	79790283	2
chr12	79790283	79790293	3
chr12	79790293	79790303	8
chr12	79790303	79790313	3
chr12	79790313	79790323	3
chr12	79790323	79790333	6
chr12	79790333	79790343	4
chr12	79790343	79790353	2
chr12	79790353	79790363	9
chr12	79790363	79790373	1
chr12	79790373	79790383	2
chr12	79790383	79790393	3
chr12	79790393	79790403	2
chr12	79790403	79790413	8
chr12	79790413	79790423	8
chr12	79790423	79790433	3
chr12	79790433	79790443	1
chr12	79790443	79790453	0
chr12	79790453	79790463	0
chr12	79790463	79790473	0
chr12	79790473	79790483	2
chr12	79790483	79790493	1
chr12	79790493	79790503	7
chr12	79790503	79790513	2
chr12	79790513	79790523	1
chr12	79790523	79790533	2
chr12	79790533	79790543	8
chr12	79790543	79790553	2
chr12	79790553	79790563	3
chr12	79790563	79790573	0
chr12	79790573	79790583	1
chr12	79790583	79790593	3
chr12	79790593	79790603	11
chr12	79790603	79790613	3
chr12	79790613	79790623	2
chr12	79790623	79790633	5
chr12	79790633	79790643	1
chr12	79790643	79790653	3
chr12	79790653	79790663	3
chr12	79790663	79790673	0
chr12	79790673	79790683	2
chr12	79790683	79790693	1
chr12	79790693	79790703	1
chr12	79790703	79790713	1
chr12	79790713	79790723	1
chr12	79790723	79790733	3
chr12	79790733	79790743	1
chr12	79790743	79790753	3
chr12	79790753	79790763	1
chr12	79790763	79790773	0
chr12	79790773	79790783	0
chr12	79790783	79790793	1
chr12	79790793	79790803	1
chr12	79790803	79790813	3
chr12	79790813	79790823	1
chr12	79790823	79790833	2
chr12	79790833	79790843	1
chr12	79790843	79790853	7
chr12	79790853	79790863	10
chr12	79790863	79790873	10
chr12	79790873	79790883	2
chr12	79790883	79790893	1
chr12	79790893	79790903	4
chr12	79790903	79790913	6
chr12	79790913	79790923	9
chr12	79790923	79790933	7
chr12	79790933	79790943	5
chr12	79790943	79790953	8
chr12	79790953	79790963	11
chr12	79790963	79790973	9
chr12	79790973	79790983	5
chr12	79790983	79790993	8
chr12	79790993	79791003	7
chr12	79791003	79791013	8
chr12	79791013	79791023	5
chr12	79791023	79791033	6
chr12	79791033	79791043	11
chr12	79791043	79791053	7
chr12	79791053	79791063	11
chr12	79791063	79791073	8
chr12	79791073	79791083	7
chr12	79791083	79791093	1
chr12	79791093	79791103	37
chr12	79791103	79791113	3
chr12	79791113	79791123	17
chr12	79791123	79791133	14
chr12	79791133	79791143	12
chr12	79791143	79791153	15
chr12	79791153	79791163	9
chr12	79791163	79791173	8
chr12	79791173	79791183	9
chr12	79791183	79791193	15
chr12	79791193	79791203	23
chr12	79791203	79791213	11
chr12	79791213	79791223	16
chr12	79791223	79791233	25
chr12	79791233	79791243	14
chr12	79791243	79791253	153
chr12	79791253	79791263	10
chr12	79791263	79791273	7
chr12	79791273	79791283	14
chr12	79791283	79791293	9
chr12	79791293	79791303	6
chr12	79791303	79791313	11
chr12	79791313	79791323	4
chr12	79791323	79791333	5
chr12	79791333	79791343	63
chr12	79791343	79791353	1
chr12	79791353	79791363	7
chr12	79791363	79791373	5
chr12	79791373	79791383	3
chr12	79791383	79791393	13
chr12	79791393	79791403	8
chr12	79791403	79791413	74
chr12	79791413	79791423	107
chr12	79791423	79791433	2
chr12	79791433	79791443	12
chr12	79791443	79791453	4
chr12	79791453	79791463	12
chr12	79791463	79791473	3
chr12	79791473	79791483	6
chr12	79791483	79791493	12
chr12	79791493	79791503	11
chr12	79791503	79791513	8
chr12	79791513	79791523	10
chr12	79791523	79791533	4
chr12	79791533	79791543	1
chr12	79791543	79791553	3
chr12	79791553	79791563	4
chr12	79791563	79791573	4
chr12	79791573	79791583	7
chr12	79791583	79791593	9
chr12	79791593	79791603	3
chr12	79791603	79791613	9
chr12	79791613	79791623	2
chr12	79791623	79791633	2
chr12	79791633	79791643	9
chr12	79791643	79791653	1
chr12	79791653	79791663	4
chr12	79791663	79791673	7
chr12	79791673	79791683	6
chr12	79791683	79791693	5
chr12	79791693	79791703	5
chr12	79791703	79791713	5
chr12	79791713	79791723	7
chr12	79791723	79791733	6
chr12	79791733	79791743	9
chr12	79791743	79791753	5
chr12	79791753	79791763	7
chr12	79791763	79791773	10
chr12	79791773	79791783	5
chr12	79791783	79791793	11
chr12	79791793	79791803	11
chr12	79791803	79791813	8
chr12	79791813	79791823	13
chr12	79791823	79791833	10
chr12	79791833	79791843	12
chr12	79791843	79791853	6
chr12	79791853	79791863	7
chr12	79791863	79791873	2
chr12	79791873	79791883	3
chr12	79791883	79791893	9
chr12	79791893	79791903	15
chr12	79791903	79791913	5
chr12	79791913	79791923	8
chr12	79791923	79791933	1
chr12	79791933	79791943	80
chr12	79791943	79791953	5
chr12	79791953	79791963	4
chr12	79791963	79791973	2
chr12	79791973	79791983	16
chr12	79791983	79791993	11
chr12	79791993	79792003	2
chr12	79792003	79792013	18
chr12	79792013	79792023	9
chr12	79792023	79792033	6
chr12	79792033	79792043	8
chr12	79792043	79792053	4
chr12	79792053	79792063	5
chr12	79792063	79792073	9
chr12	79792073	79792083	3
chr12	79792083	79792093	11
chr12	79792093	79792103	4
chr12	79792103	79792113	13
chr12	79792113	79792123	11
chr12	79792123	79792133	10
chr12	79792133	79792143	10
chr12	79792143	79792153	6
chr12	79792153	79792163	4
chr12	79792163	79792173	7
chr12	79792173	79792183	5
chr12	79792183	79792193	3
chr12	79792193	79792203	4
chr12	79792203	79792213	4
chr12	79792213	79792223	9
chr12	79792223	79792233	2
chr12	79792233	79792243	3
chr12	79792243	79792253	1
chr12	79792253	79792263	8
chr12	79792263	79792273	1
chr12	79792273	79792283	4
chr12	79792283	79792293	2
chr12	79792293	79792303	2
chr12	79792303	79792313	4
chr12	79792313	79792323	0
chr12	79792323	79792333	3
chr12	79792333	79792343	5
chr12	79792343	79792353	1
chr12	79792353	79792363	2
chr12	79792363	79792373	0
chr12	79792373	79792383	1
chr12	79792383	79792393	1
chr12	79792393	79792403	7
chr12	79792403	79792413	7
chr12	79792413	79792423	5
[truncated: 18,000 more rows]
