# Supplementary material for: Artificially inserted strong promoter containing multiple G-quadruplexes induces long-range chromatin modification
Source: eLife. 2024 Aug 19;13:RP96216. doi: 10.7554/eLife.96216 (PMC11333042; doi:10.7554/eLife.96216)
Supplement: Figure 7—figure supplement 2—source data 1. [file elife-96216-fig7-figsupp2-data1.xlsx]

## Sheet: Rep1
		R1			R2			R3			R4
10 WT	BG4	32.3552	33.052	0.84575	32.6293	33.6951	2.22015	34.2333	34.298	1.36147	32.5122	32.9878	1.14298
		33.6818			34.7609			35.9585			33.0894
		33.1189			37.068			34.3628			33.3618
	IgG	32.3724	32.8103		34.9066	34.8458		42.7709	34.7432			33.1806
		33.8677			34.785			35.6689			33.6583
		32.1908			17.6652			33.8175			32.703
10 Mut	BG4	30.9367	30.6778	1.43555	32.9884	32.0877	0.836231	34.44	34.6123	0.221473		32.395	2.42652
		34.4741			36.0883			32.9414			32.1784
		30.4189			31.187			34.7847			32.6115
	IgG	33.0356	31.1994		31.3606	31.8297		33.3848	32.4375		34.2973	33.6739
		30.7604			32.0826			32.4625			33.0504
		31.6384			32.0459			32.4126			31.5087

## Sheet: Rep2
		R1			R2			R3			R4
10 WT	BG4	32.6026	32.1862	0.935908	31.209	30.7727	2.50304	32.7648	33.0372	1.68625	29.1306	28.6835	0.84293
		31.3013			30.2233			32.5388			28.2778
		32.6547			30.8859			33.808			28.6421
	IgG	32.1078	32.0906		32.4769	32.0964		33.1395	33.791		28.8817	28.437
		32.5656			31.6488			34.5542			28.2118
		31.5984			32.1636			33.6794			28.2175
10 Mut	BG4	34.0272	34.1856	0.0838144	31.4776	31.8008	0.649504	34.2223	34.1469	0.189873	29.0186	29.1748	0.555809
		34.0807			32.4287			32.9662			28.8663
		34.4489			31.4961			35.2523			29.6394
	IgG	30.7723	30.6089		30.767	31.1782		34.054	31.75		28.7484	28.3274
		30.2014			31.4631			31.4119			28.0209
		30.8532			31.3046			32.0881			28.2129

## Sheet: Compilation
				G4 array insert		Mutated G4 insert
			R1	0.84575	0.935908	1.43555	0.0838144
			R2	2.22015	2.50304	0.836231	0.649504
			R3	1.36147	1.68625	0.221473	0.189873
			R4	1.14298	0.84293	2.42652	0.555809
