# Supplementary material for: Artificially inserted strong promoter containing multiple G-quadruplexes induces long-range chromatin modification
Source: eLife. 2024 Aug 19;13:RP96216. doi: 10.7554/eLife.96216 (PMC11333042; doi:10.7554/eLife.96216)
Supplement: Figure 7—source data 1. [file elife-96216-fig7-data1.xlsx]

## Sheet: C
Rep1											Rep2											Rep3
R1	KL TG4 LHA 200 WT										R1	KL TG4 LHA 200 WT										R1	KL TG4 LHA 200 WT
		KL TG4 WT				KL TG4 Mut							KL TG4 WT				KL TG4 Mut							KL TG4 WT				KL TG4 Mut
		30.0153				33.97							32.4942				31.9289							33.4142				31.9289
	Inp	29.2727	29.5424	22.8984		32.82	33.7	27.056				Inp	33.4334	33.0202	26.3762		31.8265	31.9482	25.3042				Inp	32.2488	32.7398	26.0958		31.8265	31.9482	25.3042
		29.3394				34.31							33.133				32.0893							32.5565				32.0893
		30.3949				32.06							32.9196				32.2418							33.1727				32.1066
	H3	30.5339	30.736	0.437179		32.63	32.345	2.55772				H3	33.4808	32.8849	1.09824		32.6253	32.5707	0.649484				H3	34.3742	33.2535	0.700391		32.1227	32.0854	0.909185
		31.2792				34.13							32.2542				32.8451							33.3342				32.027
		30.2471				37.14							33.1638				32.0615							31.6831				31.5265
	H3K4Me1	29.6232	29.7803	0.847909	1.9395	30.59	31.02	6.40792	2.50533			H3K4Me1	32.7058	33.0178	1.00155	0.911964	32.9778	32.3887	0.736828	1.13448			H3K4Me1	32.2131	31.9834	1.68913	2.41169	31.6483	31.5613	1.3075	1.4381
		29.4706				31.45							33.1838				32.1267							32.054				31.509
R2	KL TG4 LHA In Cr										R2	KL TG4 LHA In Cr										R2	KL TG4 LHA In Cr
		KL TG4 WT				KL TG4 Mut							KL TG4 WT				KL TG4 Mut							KL TG4 WT				KL TG4 Mut
		29.8421				35.8261							33.7294				33.5745							32.7693				33.5745
	Inp	30.1818	30.1577	23.5137		34.208	34.4598	27.8158				Inp	32.9317	33.2423	26.5983		33.5603	33.7732	27.1292				Inp	32.3741	32.7315	26.0875		33.5603	33.7732	27.1292
		30.4492				33.3453							33.0657				34.1849							33.0511				34.1849
		32.8695				45.0597							32.9699				33.4323							33.9785				32.6579
	H3	31.6385	31.6316	0.359958		34.9848	34.9466	0.713571				H3	32.5159	32.5773	1.58538		32.8724	32.8236	1.93122				H3	32.368	32.1346	1.51236		32.5134	32.5571	2.32297
		31.6247				34.9084							32.2461				32.166							31.9012				32.5
		30.5994				34.1545							32.6187				34.0521							31.3582				32.4278
	H3K4Me1	31.0155	30.5747	0.748879	2.08046	33.4572	33.7199	1.66988	2.34017			H3K4Me1	32.88	32.7468	1.40962	0.889138	33.0934	33.6431	1.09431	0.566644			H3K4Me1	32.2967	31.4116	2.49637	1.65065	31.5948	32.339	2.70209	1.1632
		30.1093				33.5481							32.7418				33.7837							31.4649				32.2502
R3	KL TG4 RHA Cr										R3	KL TG4 RHA Cr										R3	KL TG4 RHA Cr
		KL TG4 WT				KL TG4 Mut							KL TG4 WT				KL TG4 Mut							KL TG4 WT				KL TG4 Mut
		30.7896				32.5848							32.5322				33.7197							32.0916				33.7197
	Inp	30.6398	30.728	24.084		32.9679	33.4593	26.8153				Inp	32.7217	32.6981	26.0541		32.1245	32.7922	26.1482				Inp	33.2597	32.937	26.293		32.1245	32.7922	26.1482
		30.7546				34.8253							32.8404				32.5323							33.4598				32.5323
		34.4519				35.3371							33.3648				34.1115							35.9018				33.6839
	H3	33.4215	33.929	0.108733		39.2306	35.0288	0.336899				H3	33.0486	33.1613	0.725313		33.2024	33.2975	0.704433				H3	34.8065	34.4234	0.356857		32.95	33.3358	0.686003
		33.9136				34.7206							33.0704				33.3926							34.0404				33.3734
		31.2555				33.0921							32.0338				32.931							33.3076				34.1361
	H3K4Me1	31.6198	31.4884	0.590293	5.42883	33.8987	33.3689	1.0646	3.16001			H3K4Me1	32.7199	32.3768	1.24928	1.72241	32.9119	32.8564	0.956363	1.35763			H3K4Me1	33.3945	33.3649	0.743282	2.08286	32.5714	32.8972	0.92971	1.35526
		31.5898				33.1158							33.0513				32.7264							33.3926				33.223
R4	KL TG4 RHA 200 Cr										R4	KL TG4 RHA 200 Cr										R4	KL TG4 RHA 200 Cr
		KL TG4 WT				KL TG4 Mut							KL TG4 WT				KL TG4 Mut							KL TG4 WT				KL TG4 Mut
		30.0986				34.0804							33.1524				32.2013							31.6506				32.2013
	Inp	30.0418	30.1723	23.5283		31.6037	34.778	28.134				Inp	32.8454	32.9619	26.3179		32.0626	32.0502	25.4062				Inp	32.2351	31.7654	25.1214		32.0626	32.0502	25.4062
		30.3765				38.6499							32.8877				31.8868							31.4105				31.8868
		31.8422				33.6851							33.2641				31.4943							33.1959				32.2811
	H3	32.3547	32.3368	0.22304		33.2577	33.4714	2.47326				H3	32.8244	32.7719	1.14065		32.1699	31.8175	1.17496				H3	33.7374	33.5169	0.296974		32.1719	31.9693	1.05762
		32.8134				34.8775							32.227				31.7883							33.6172				31.4549
		29.8871				31.1551							31.9815				32.2485							32.053				31.4043
	H3K4Me1	29.6985	29.8349	1.26334	5.6642	31.2119	31.339	10.8439	4.38444			H3K4Me1	32.0766	32.1629	1.73972	1.52519	32.0866	32.3796	0.795818	0.677313			H3K4Me1	32.4996	31.9792	0.862158	2.90314	32.5011	31.5026	1.46156	1.38194
		29.9191				31.65							32.4305				32.8036							31.3851				31.6009
Compilation
		KL TG4 WT			KL TG4 WT		KL TG4 Mut			KL TG4 Mut
KL TG4 LHA 200 WT	R1	1.9395	0.911964	2.41169	1.75439	0.626098	2.50533	1.13448	1.4381	1.69264	0.587876		R1	0.774151	0.803859	1.677
KL TG4 LHA In Cr	R2	2.08046	0.889138	1.65065	1.54008	0.492599	2.34017	0.566644	1.1632	1.35667	0.73685		R2	0.88902	1.56913	1.41905
KL TG4 RHA Cr	R3	5.42883	1.72241	2.08286	3.07803	1.66877	3.16001	1.35763	1.35526	1.95763	0.850207		R3	1.71798	1.26868	1.53687
KL TG4 RHA 200 Cr	R4	5.6642	1.52519	2.90314	3.36418	1.7209	4.38444	0.677313	1.38194	2.1479	1.60742		R4	1.29189	2.25183	2.10077

## Sheet: D
Rep1												Rep2											Rep3
R1	KL TG4 LHA 200 WT											R1	KL TG4 LHA 200 WT										R1	KL TG4 LHA 200 WT
		KL TG4 WT				KL TG4 Mut								KL TG4 WT				KL TG4 Mut							KL TG4 WT				KL TG4 Mut
		28.9563					29.6705							30.4994				30.7523							33.3095				32.7275
	Inp	29.1226	29.0456	22.4016		Inp	29.3277	29.406	22.762				Inp	31.4922	30.8172	24.1732		31.0047	30.8935	24.2495				Inp	33.3617	33.7036	27.0596		31.2947	31.8956	25.2516
		29.0579					29.2198							30.4599				30.9236							34.4396				31.6644
		29.5757					29.0891							30.7729				30.8697							33.6508				31.2611
	H3	29.1245	29.3915	0.786728		H3	29.4133	29.3478	1.04105				H3	31.3778	31.0787	0.834114		30.0697	30.6028	1.22315				H3	31.9938	32.7393	1.95092		31.4766	31.2728	1.53965
		29.4745					29.541							31.0854				30.869							32.5732				31.0806
		28.6386					29.3926							29.0565				29.4644							32.4914				30.6444
	H3K27Ac	28.6805	28.5824	1.37845	1.75213	H3K27Ac	28.8656	28.9498	1.37174	1.31765			H3K27Ac	29.2345	29.1401	3.19734	3.83322	29.6823	29.5267	2.57875	2.10829			H3K27Ac	33.0461	32.6228	2.11499	1.0841	30.6971	32.1664	0.828749	0.53827
		28.4282					28.5912							29.1295				29.4335							32.3309				35.1576
R2	KL TG4 LHA In Cr											R2	KL TG4 LHA In Cr										R2	KL TG4 LHA In Cr
		KL TG4 WT				KL TG4 Mut								KL TG4 WT				KL TG4 Mut							KL TG4 WT				KL TG4 Mut
		29.3172					30.707							30.4442				30.3446							33.7017				34.1516
	Inp	29.6034	29.5058	22.8618		Inp	30.7087	30.8159	24.1719				Inp	30.5841	30.6784	24.0344		30.2266	30.2238	23.5798				Inp	33.1055	33.8887	27.2447		33.5817	33.8165	27.1725
		29.5968					31.0319							31.0068				30.1							34.8589				33.7162
		29.9003					30.1376							30.504				30.0921							32.5618				33.126
	H3	29.1347	29.4019	1.07458		H3	30.0337	30.0045	1.75475				H3	30.904	30.7327	0.962954		30.1261	29.982	1.18233				H3	33.3775	32.8524	2.0507		33.0465	33.1417	1.59618
		29.1708					29.8421							30.7901				29.7277							32.618				33.2527
		28.761					29.4214							29.8607				31.1862							33.0108				32.148
	H3K27Ac	29.0699	28.9091	1.51207	1.40713	H3K27Ac	29.4634	29.4557	2.56695	1.46286			H3K27Ac	29.7861	29.8272	1.80384	1.87323	30.6892	31.0743	0.554535	0.469019			H3K27Ac	32.2144	32.1748	3.28006	1.59949	32.0296	32.0888	3.31173	2.07478
		28.8965					29.4822							29.8348				31.3474							32.1353				31.2108
R3	KL TG4 RHA Cr											R3	KL TG4 RHA Cr										R3	KL TG4 RHA Cr
		KL TG4 WT				KL TG4 Mut								KL TG4 WT				KL TG4 Mut							KL TG4 WT				KL TG4 Mut
		30.1979					30.6797							30.6005				31.3979							34.9549				32.9757
	Inp	30.9835	30.554	23.91		Inp	31.1813	30.7007	24.0567				Inp	30.5287	30.6787	24.0347		31.203	31.5196	24.8756				Inp	33.2077	34.294	27.65		32.5262	32.598	25.954
		30.4807					30.2413							30.9069				31.958							34.7194				32.292
		31.334					30.5833							31.5947				31.3266							33.539				32.4128
	H3	31.257	31.1716	0.651694		H3	31.4267	30.6548	1.03229				H3	31.282	31.6199	0.520761		31.3172	31.3319	1.13888				H3	34.4527	33.7991	1.40907		32.2773	32.274	1.25164
		30.9238					30.7262							31.9829				31.3518							33.4057				32.132
		30.1186					30.2032							30.3449				30.337							32.785				32.2394
	H3K27Ac	30.5677	30.3383	1.16118	1.78179	H3K27Ac	30.3657	30.2585	1.3586	1.31611			H3K27Ac	30.9705	30.3799	1.23002	2.36197	30.5164	30.356	2.24004	1.96689			H3K27Ac	33.2323	33.1672	2.18349	1.5496	32.2213	32.1599	1.35462	1.08228
		30.3286					30.2066							29.8242				30.2146							33.4845				32.0191
R4	KL TG4 RHA 200 Cr											R4	KL TG4 RHA 200 Cr										R4	KL TG4 RHA 200 Cr
		KL TG4 WT				KL TG4 Mut								KL TG4 WT				KL TG4 Mut							KL TG4 WT				KL TG4 Mut
		28.7274					30.004							30.8129				31.0041							31.8084				32.3568
	Inp	29.2197	29.1403	22.4963		Inp	29.9674	29.8278	23.1838				Inp	31.1517	30.863	24.219		31.0281	31.1476	24.5036				Inp	34.187	34.0965	27.4525		32.2676	32.4281	25.7841
		29.474					29.5119							30.6242				31.4106							36.2941				32.6601
		29.6135					28.7244							31.6051				31.3501							33.1105				31.0962
	H3	29.2167	29.3778	0.848165		H3	28.8092	28.8797	1.92907				H3	30.4698	31.1031	0.846563		31.3971	31.185	0.974264				H3	33.6348	33.2142	1.84306		31.5777	31.3384	2.12814
		29.3031					29.1056							31.2344				30.8078							32.8974				31.3413
		28.4459					28.1365							29.9036				30.0108							32.5523				31.1098
	H3K27Ac	29.5242	28.8681	1.20759	1.42377	H3K27Ac	28.0941	28.1418	3.21726	1.66778			H3K27Ac	30.2916	30.4368	1.34349	1.58699	30.2577	30.0373	2.15864	2.21566			H3K27Ac	33.0844	32.5961	2.82893	1.53491	30.9641	31.1988	2.34434	1.10159
		28.6341					28.1949							31.1152				29.8434							32.1516				31.5226
Compilation
		KL TG4 WT			KL TG4 WT		KL TG4 Mut			KL TG4 Mut
KL TG4 LHA 200 WT	R1	1.75213	3.83322	1.0841	2.22315	1.1707	1.31765	2.10829	0.53827	1.3214	0.640962		R1	1.32973	1.81817	2.01404
KL TG4 LHA In Cr	R2	1.40713	1.87323	1.59949	1.62662	0.191249	1.46286	0.469019	2.07478	1.33556	0.661703		R2	0.961904	3.99394	0.770918
KL TG4 RHA Cr	R3	1.78179	2.36197	1.5496	1.89778	0.341641	1.31611	1.96689	1.08228	1.45509	0.374273		R3	1.35383	1.20087	1.43179
KL TG4 RHA 200 Cr	R4	1.42377	1.58699	1.53491	1.51522	0.0680739	1.66778	2.21566	1.10159	1.66168	0.454837		R4	0.853692	0.71626	1.39335

## Sheet: E
Rep1											Rep2											Rep3
R1	KL TG4 LHA 200 WT										R1	KL TG4 LHA 200 WT										R1	KL TG4 LHA 200 WT
		KL TG4 WT				KL TG4 Mut							KL TG4 WT				KL TG4 Mut							KL TG4 WT				KL TG4 Mut
		33.3095				32.7275							33.831				32.1202							30.0153				33.97
	Inp	33.3617	33.7036	27.0596		31.2947	31.8956	25.2516				Inp	33.223	33.4756	26.8316		31.5967	31.9314	25.2874				Inp	29.2727	29.5424	22.8984		32.82	33.7	27.056
		34.4396				31.6644							33.3726				32.0772							29.3394				34.31
		33.6508				31.2611							33.5354				32.0366							30.3949				32.06
	H3	31.9938	32.7393	1.95092		31.4766	31.2728	1.53965				H3	33.7825	33.4624	1.00908		32.4472	32.4123	0.716451				H3	30.5339	30.736	0.437179		32.63	32.345	2.55772
		32.5732				31.0806							33.0693				32.753							31.2792				34.13
		33.4027				31.7609							33.5051				33.3337							30.2643				33.72
	H3K27Me3	33.8175	33.3133	1.31053	0.671748	31.7791	31.8505	1.03158	0.670012			H3K27Me3	34.2915	33.708	0.851081	0.843424	33.7358	33.2547	0.399564	0.557699			H3K27Me3	30.2416	30.2952	0.593425	1.3574	34.37	33.5867	1.08162	0.422884
		32.7197				32.0116							33.3276				32.6947							30.3796				32.67
R2	KL TG4 LHA In Cr										R2	KL TG4 LHA In Cr										R2	KL TG4 LHA In Cr
		KL TG4 WT				KL TG4 Mut							KL TG4 WT				KL TG4 Mut							KL TG4 WT				KL TG4 Mut
		33.7017				34.1516							32.6005				33.0546							29.8421				35.8261
	Inp	33.1055	33.8887	27.2447		33.5817	33.8165	27.1725				Inp	31.8838	32.272	25.628		32.7609	32.8558	26.2118				Inp	30.1818	30.1577	23.5137		34.208	34.4598	27.8158
		34.8589				33.7162							32.3318				32.7517							30.4492				33.3453
		32.5618				33.126							31.8552				32.8431							32.8695				45.0597
	H3	33.3775	32.8524	2.0507		33.0465	33.1417	1.59618				H3	32.6196	32.349	0.947946		32.1597	32.4756	1.30135				H3	31.6385	31.6316	0.359958		34.9848	34.9466	0.713571
		32.618				33.2527							32.5722				32.4241							31.6247				34.9084
		32.3469				34.3658							33.5321				32.2886							31.4129				34.4953
	H3K27Me3	33.0316	32.7378	2.22027	1.08269	34.0426	34.0033	0.878451	0.550346			H3K27Me3	32.2501	32.0341	1.17915	1.2439	32.3946	32.6158	1.18085	0.907402			H3K27Me3	31.4759	31.3051	0.451376	1.25397	33.5059	33.9201	1.45352	2.03697
		32.8349				33.6017							31.8181				33.1642							31.0266				33.7593
R3	KL TG4 RHA Cr										R3	KL TG4 RHA Cr										R3	KL TG4 RHA Cr
		KL TG4 WT				KL TG4 Mut							KL TG4 WT				KL TG4 Mut							KL TG4 WT				KL TG4 Mut
		34.9549				32.9757							32.8071				32.4341							30.7896				32.5848
	Inp	33.2077	34.294	27.65		32.5262	32.598	25.954				Inp	32.7315	33.0389	26.3949		31.8788	32.109	25.465				Inp	30.6398	30.728	24.084		32.9679	33.4593	26.8153
		34.7194				32.292							33.5783				32.0142							30.7546				34.8253
		33.539				32.4128							34.6058				33.6136							34.4519				35.3371
	H3	34.4527	33.7991	1.40907		32.2773	32.274	1.25164				H3	34.4475	34.5267	0.35654		32.951	33.0455	0.522457				H3	33.4215	33.929	0.108733		39.2306	35.0288	0.336899
		33.4057				32.132							37.1982				32.5719							33.9136				34.7206
		34.0795				32.6401							33.4206				33.2153							32.3976
	H3K27Me3	32.4139	33.208	2.12265	1.50642	33.0033	32.6489	0.965227	0.771171			H3K27Me3	33.4708	33.405	0.775819	2.17596	33.2559	33.336	0.427176	0.817628			H3K27Me3	32.3477	32.4514	0.302816	2.78496	33.6742	33.5435	0.943237	2.79976
		33.1307				32.3032							33.3236				33.5367							32.6087				33.4129
R4	KL TG4 RHA 200 Cr										R4	KL TG4 RHA 200 Cr										R4	KL TG4 RHA 200 Cr
		KL TG4 WT				KL TG4 Mut							KL TG4 WT				KL TG4 Mut							KL TG4 WT				KL TG4 Mut
		31.8084				32.3568							33.5689				31.6624							30.0986				34.0804
	Inp	34.187	34.0965	27.4525		32.2676	32.4281	25.7841				Inp	33.5413	33.0887	26.4447		32.786	32.3651	25.7211				Inp	30.0418	30.1723	23.5283		31.6037	34.778	28.134
		36.2941				32.6601							32.1559				32.6469							30.3765				38.6499
		33.1105				31.0962							42.7657				32.0939							31.8422				33.6851
	H3	33.6348	33.2142	1.84306		31.5777	31.3384	2.12814				H3	35.0852	34.3842	0.40735		31.7397	31.9463	1.33668				H3	32.3547	32.3368	0.22304		33.2577	33.4714	2.47326
		32.8974				31.3413							33.6831				32.0053							32.8134				34.8775
		33.1155				32.3608							34.0011				34.5865							31.2363				34.5405
	H3K27Me3	33.1011	32.8132	2.43359	1.32041	31.9604	32.5687	0.907053	0.426219			H3K27Me3	33.7284	33.7154	0.647597	1.58978	33.4983	33.3638	0.500393	0.374356			H3K27Me3	31.2933	31.0746	0.534994	2.39864	33.9332	34.2369	1.45494	0.588269
		32.2231				33.385							33.4166				32.0067							30.6941				36.4418
Compilation
		KL TG4 WT			KL TG4 WT		KL TG4 Mut			KL TG4 Mut
KL TG4 LHA 200 WT	R1	0.671748	0.843424	1.3574	0.957523	0.29131	0.670012	0.557699	0.422884	0.550198	0.101029		R1	1.00259	1.51233	3.20986
KL TG4 LHA In Cr	R2	1.08269	1.2439	1.25397	1.19352	0.0784745	0.550346	0.907402	2.03697	1.16491	0.633637		R2	1.96729	1.37083	0.615604
KL TG4 RHA Cr	R3	1.50642	2.17596	2.78496	2.15578	0.522155	0.771171	0.817628	2.79976	1.46285	0.945526		R3	1.95342	2.66132	0.994713
KL TG4 RHA 200 Cr	R4	1.32041	1.58978	2.39864	1.76961	0.458187	0.426219	0.374356	0.588269	0.462948	0.09111		R4	3.09796	4.24671	4.07746

## Sheet: F
Rep1											Rep2											Rep3
R1	KL TG4 LHA 200 WT										R1	KL TG4 LHA 200 WT										R1	KL TG4 LHA 200 WT
		KL TG4 WT				KL TG4 Mut							KL TG4 WT				KL TG4 Mut							KL TG4 WT				KL TG4 Mut
		33.3095				32.7275							29.6678				31.9289							29.6678				31.9289
	Inp	33.3617	33.7036	27.0596		31.2947	31.8956	25.2516				Inp	29.606	29.5719	22.9279		31.8265	31.9482	25.3042				Inp	29.606	29.5719	22.9279		31.8265	31.9482	25.3042
		34.4396				31.6644							29.4419				32.0893							29.4419				32.0893
		33.6508				31.2611							30.3523				32.2418							30.1358				32.1066
	H3	31.9938	32.7393	1.95092		31.4766	31.2728	1.53965				H3	30.3325	30.5014	0.524989		32.6253	32.5707	0.649484				H3	30.4071	30.3204	0.595178		32.1227	32.0854	0.909185
		32.5732				31.0806							30.8194				32.8451							30.4182				32.027
		32.9406				31.0521							30.5039				32.2764							30.5979				32.2622
	H3K9Me3	33.5338	33.5246	1.13194	0.580206	31.0815	31.4858	1.32833	0.862749			H3K9Me3	30.6044	30.6055	0.488448	0.930396	32.4346	32.5707	0.649495	1.00002			H3K9Me3	30.0299	30.3784	0.571735	0.960611	33.2105	32.5807	0.645001	0.709427
		34.0995				32.3238							30.7082				33.001							30.5072				32.2694
R2	KL TG4 LHA In Cr										R2	KL TG4 LHA In Cr										R2	KL TG4 LHA In Cr
		KL TG4 WT				KL TG4 Mut							KL TG4 WT				KL TG4 Mut							KL TG4 WT				KL TG4 Mut
		33.7017				34.1516							29.6351				33.5745							29.6351				33.5745
	Inp	33.1055	33.8887	27.2447		33.5817	33.8165	27.1725				Inp	29.3718	29.6332	22.9892		33.5603	33.7732	27.1292				Inp	29.3718	29.6332	22.9892		33.5603	33.7732	27.1292
		34.8589				33.7162							29.8926				34.1849							29.8926				34.1849
		32.5618				33.126							30.4495				33.4323							30.0838				32.6579
	H3	33.3775	32.8524	2.0507		33.0465	33.1417	1.59618				H3	31.038	30.6375	0.498443		32.8724	32.8236	1.93122				H3	29.9837	30.2564	0.64913		32.5134	32.5571	2.32297
		32.618				33.2527							30.4251				32.166							30.7018				32.5
		34.0718				32.4331							30.7557				32.0149							30.7863				32.7885
	H3K9Me3	32.9644	33.5699	1.24713	0.608148	32.0728	32.2937	2.87314	1.80001			H3K9Me3	29.9779	30.634	0.499662	1.00245	33.0037	32.3225	2.73326	1.4153			H3K9Me3	30.5321	30.4957	0.549918	0.847162	33.3256	32.5459	2.34119	1.00784
		33.6736				32.3754							31.1684				31.9488							30.1688				31.5234
R3	KL TG4 RHA Cr										R3	KL TG4 RHA Cr										R3	KL TG4 RHA Cr
		KL TG4 WT				KL TG4 Mut							KL TG4 WT				KL TG4 Mut							KL TG4 WT				KL TG4 Mut
		34.9549				32.9757							29.8953				33.7197							29.8953				33.7197
	Inp	33.2077	34.294	27.65		32.5262	32.598	25.954				Inp	29.9383	29.9423	23.2983		32.1245	32.7922	26.1482				Inp	29.9383	29.9423	23.2983		32.1245	32.7922	26.1482
		34.7194				32.292							29.9934				32.5323							29.9934				32.5323
		33.539				32.4128							30.4466				34.1115							31.6695				33.6839
	H3	34.4527	33.7991	1.40907		32.2773	32.274	1.25164				H3	30.6121	30.5628	0.650388		33.2024	33.2975	0.704433				H3	30.7867	31.0998	0.448255		32.95	33.3358	0.686003
		33.4057				32.132							30.6297				33.3926							30.8431				33.3734
		34.6228				32.128							30.8894				32.6874							30.4646				34.1563
	H3K9Me3	33.785	34.0626	1.17389	0.833099	31.6738	32.08	1.43176	1.14391			H3K9Me3	30.6379	30.6766	0.601046	0.924135	33.4171	32.9407	0.902085	1.28058			H3K9Me3	30.7084	30.8062	0.54942	1.22569	33.6767	33.9165	0.458671	0.668613
		33.7799				32.4384							30.5026				32.7177							31.2456				32.1533
R4	KL TG4 RHA 200 Cr										R4	KL TG4 RHA 200 Cr										R4	KL TG4 RHA 200 Cr
		KL TG4 WT				KL TG4 Mut							KL TG4 WT				KL TG4 Mut							KL TG4 WT				KL TG4 Mut
		31.8084				32.3568							29.2659				32.2013							29.2659				32.2013
	Inp	34.187	34.0965	27.4525		32.2676	32.4281	25.7841				Inp	29.8183	29.7371	23.0931		32.0626	32.0502	25.4062				Inp	29.8183	29.7371	23.0931		32.0626	32.0502	25.4062
		36.2941				32.6601							30.1271				31.8868							30.1271				31.8868
		33.1105				31.0962							30.2621				31.4943							30.1129				32.2811
	H3	33.6348	33.2142	1.84306		31.5777	31.3384	2.12814				H3	30.4654	30.1586	0.746579		32.1699	31.8175	1.17496				H3	29.8256	30.2403	0.705457		32.1719	31.9693	1.05762
		32.8974				31.3413							29.7482				31.7883							30.7825				31.4549
		32.6725				31.519							31.0655				31.2604							30.3418				32.0463
	H3K9Me3	34.2644	33.5656	1.44462	0.783816	30.3236	30.9551	2.77583	1.30435			H3K9Me3	30.0356	30.4835	0.596023	0.798339	32.4833	32.5269	0.718594	0.611588			H3K9Me3	29.7201	30.0291	0.816661	1.15763	31.4226	32.0097	1.02842	0.972399
		33.7601				31.0226							30.3494				32.5704							30.0255				32.5601
Compilation
		KL TG4 WT			KL TG4 WT		KL TG4 Mut			KL TG4 Mut
KL TG4 LHA 200 WT	R1	0.580206	0.930396	0.960611	0.823738	0.172644	0.862749	1.00002	0.709427	0.857398	0.118694		R1	0.672508	0.930379	1.35407
KL TG4 LHA In Cr	R2	0.608148	1.00245	0.847162	0.819252	0.162177	1.80001	1.4153	1.00784	1.40772	0.323444		R2	0.337858	0.70829	0.840569
KL TG4 RHA Cr	R3	0.833099	0.924135	1.22569	0.994307	0.167778	1.14391	1.28058	0.668613	1.03103	0.262275		R3	0.728292	0.721652	1.83318
KL TG4 RHA 200 Cr	R4	0.783816	0.798339	1.15763	0.913263	0.172898	1.30435	0.611588	0.972399	0.962778	0.282899		R4	0.600926	1.30535	1.19049

## Sheet: G
Rep1											Rep2											Rep3
R1	KL TG4 LHA 200 WT										R1	KL TG4 LHA 200 WT										R1	KL TG4 LHA 200 WT
		KL TG4 WT				KL TG4 Mut							KL TG4 WT				KL TG4 Mut							KL TG4 WT				KL TG4 Mut
		30.0255				29.0202							30.7809				30.8745							30.3228				29.7216
	Inp	29.4625	29.9912	23.3472		29.068	29.0892	22.4452				Inp	30.3962	30.6069	23.9629		30.1211	30.5784	23.9344				Inp	31.4606	30.7134	24.0694		30.0937	29.837	23.193
		30.4857				29.1795							30.6437				30.7397							30.3568				29.6956
		29.5763				29.1226							32.4955				30.7408							31.1609				30.6275
	H3	29.3016	29.3984	1.50806		28.9247	29.0727	1.01144				H3	31.0748	31.6908	0.471703		31.9889	31.3152	0.600018				H3	32.3462	31.3657	0.63618		31.0478	30.8094	0.509608
		29.3173				29.1707							31.5021				31.216							31.5705				30.7529
		27.72				27.5594							29.2986				28.9335							28.4644				28.7073
	H3K4Me3	27.758	27.8071	4.54399	3.01314	27.607	27.6918	2.63409	2.60429			H3K4Me3	29.2201	29.2154	2.62328	5.5613	29.0643	29.0987	2.78868	4.64766			H3K4Me3	28.544	28.4503	4.79951	7.54427	29.1367	28.7176	2.17236	4.26281
		27.9434				27.9089							29.1275				29.2984							28.3426				28.3088
R2	KL TG4 LHA In Cr										R2	KL TG4 LHA In Cr										R2	KL TG4 LHA In Cr
		KL TG4 WT				KL TG4 Mut							KL TG4 WT				KL TG4 Mut							KL TG4 WT				KL TG4 Mut
		30.8034				30.3592							30.7319				31.7871							30.9254				31.5982
	Inp	30.1897	30.2884	23.6444		30.5463	30.3999	23.7559				Inp	30.8613	31.0585	24.4145		33.1993	32.1855	25.5415				Inp	30.5129	30.9109	24.2669		31.0824	31.5404	24.8964
		29.8722				30.2941							31.5822				31.57							31.2944				31.9405
		30.4104				31.2785							31.1675				33.7373							35.0054				32.403
	H3	30.2028	30.1785	1.07907		31.2336	31.3286	0.525262				H3	32.7721	31.3547	0.814286		33.258	33.1591	0.509158				H3	32.18	32.7579	0.277944		32.6628	32.6377	0.467317
		29.9222				31.4737							31.542				32.4822							33.3358				32.8475
		28.5373				29.2916							30.1442				30.5233							29.0485				29.7461
	H3K4Me3	29.2286	28.7191	2.96727	2.74985	29.4159	29.5111	1.85143	3.52478			H3K4Me3	29.7695	30.1059	1.93517	2.37653	31.0625	30.8997	2.43785	4.78801			H3K4Me3	29.2222	29.1886	3.29917	11.8699	30.2947	30.2157	2.50455	5.35942
		28.3915				29.8257							30.4039				31.1134							29.2952				30.6062
R3	KL TG4 RHA Cr										R3	KL TG4 RHA Cr										R3	KL TG4 RHA Cr
		KL TG4 WT				KL TG4 Mut							KL TG4 WT				KL TG4 Mut							KL TG4 WT				KL TG4 Mut
		31.7761				31.5738							32.6545				32.2798							32.4101				31.6908
	Inp	32.243	31.9319	25.2879		30.8768	31.4725	24.8285				Inp	32.8165	32.3748	25.7308		33.1375	33.0484	26.4044				Inp	32.6699	32.3182	25.6742		32.0129	32.0136	25.3696
		31.7767				31.9667							31.6535				33.7278							31.8745				32.337
		31.6451				32.4332							33.9504				35.8894							33.2035				34.1047
	H3	32.0396	31.6394	1.22463		32.3498	32.1902	0.607973				H3	32.3474	33.9559	0.334207		35.2037	35.0337	0.252521				H3	35.2981	34.2073	0.269945		34.0654	34.033	0.246625
		31.2335				31.7878							33.9614				34.0082							34.1202				33.929
		30.9411				30.2163							31.7621				32.2702							31.3031				31.4448
	H3K4Me3	31.5888	31.0843	1.79935	1.4693	30.4114	30.4839	1.98401	3.26333			H3K4Me3	31.5252	31.627	1.6791	5.02414	32.0891	31.8504	2.29397	9.08429			H3K4Me3	31.3633	31.4936	1.77078	6.55978	31.7627	31.602	1.33	5.39282
		30.723				30.824							31.5937				31.1918							31.8145				31.5985
R4	KL TG4 RHA 200 Cr										R4	KL TG4 RHA 200 Cr										R4	KL TG4 RHA 200 Cr
		KL TG4 WT				KL TG4 Mut							KL TG4 WT				KL TG4 Mut							KL TG4 WT				KL TG4 Mut
		30.4709				29.164							30.2231				31.1077							30.098				30.0316
	Inp	30.2492	30.3581	23.7141		29.2242	29.3021	22.6581				Inp	30.535	30.4042	23.7602		30.8207	30.7608	24.1168				Inp	30.499	30.501	23.857		29.9525	29.8583	23.2143
		30.3542				29.518							30.4545				30.3541							30.906				29.5909
		29.625				29.2343							31.6405				31.6951							31.9127				31.2249
	H3	30.5314	29.8861	1.38689		30.4692	29.8202	0.698209				H3	31.5427	31.3874	0.505823		31.7382	31.7263	0.512066				H3	32.0585	31.8373	0.395998		31.493	31.2099	0.391823
		29.5019				29.7572							30.9788				31.7457							31.5407				30.9119
		29.5531				28.0577							30.6361				29.7002							29.9287				29.4375
	H3K4Me3	29.6562	29.4928	1.82146	1.31334	28.5511	28.3222	1.97208	2.82448			H3K4Me3	31.3707	30.8071	0.756252	1.49509	30.2799	29.9868	1.70983	3.33907			H3K4Me3	29.1621	29.4191	2.11653	5.34481	29.6261	29.5986	1.19714	3.0553
		29.2692				28.358							30.4146				29.9804							29.1666				29.7322
Compilation
		KL TG4 WT			KL TG4 WT		KL TG4 Mut			KL TG4 Mut
KL TG4 LHA 200 WT	R1	3.01314	5.5613	7.54427	5.3729	1.85461	2.60429	4.64766	4.26281	3.83825	0.886575		R1	1.15699	1.19658	1.76979
KL TG4 LHA In Cr 2	R2	2.74985	2.37653	11.8699	5.66543	4.38987	3.52478	4.78801	5.35942	4.5574	0.766535		R2	0.780149	0.49635	2.21477
KL TG4 RHA Cr	R3	1.4693	5.02414	6.55978	4.35107	2.13198	3.26333	9.08429	5.39282	5.91348	2.40475		R3	0.450245	0.553058	1.21639
KL TG4 RHA 200 Cr	R4	1.31334	1.49509	5.34481	2.71775	1.8591	2.82448	3.33907	3.0553	3.07295	0.210451		R4	0.464985	0.447757	1.74936

## Sheet: H
Rep1													Rep2													Rep3
HEK 293T WT				10M TG4 WT				10M TG4 Mut					HEK 293T WT				10M TG4 WT				10M TG4 Mut					HEK 293T WT				10M TG4 WT				10M TG4 Mut
	15.4024			15.8067				15.9068						14.8826			16.7417				17.1372						14.384			15.5508				15.3404
GAPDH	15.2899	15.4404		15.8885	15.8431			15.8685	15.9161				GAPDH	14.8413	14.905		16.8206	16.8488			17.4701	17.2471				GAPDH	14.5305	14.4753		15.5366	15.5942			15.4011	15.3813
	15.6289			15.8342				15.9731						14.9912			16.9842				17.1339						14.5114			15.6952				15.4025
	30.561			22.7025				23.2396						28.9947			23.4137				24.2845						29.1787			21.43				21.6949
KLRC2	31.0553	30.8248	15.3844	22.5192	22.5632	6.72004	405.726	23.1648	23.183	7.2669	277.724		KLRC2	29.295	29.2972	14.3921	23.5328	23.4163	6.56748	226.703	24.2731	24.2626	7.01558	166.176		KLRC2	29.1707	29.0251	14.5498	21.4577	21.4484	5.85419	414.617	21.8165	21.7054	6.32405	299.368
	30.8581			22.4678				23.1447						29.6018			23.3024				24.2303						28.726			21.4575				21.6046
	35.2968			33.612				35.1618					HEK 293T WT				10M TG4 WT				10M TG4 Mut						32.8522			32.2167
KLRC1	35.8291	35.5629	20.1225	35.0288	34.5406	18.6975	2.68529	35.227	35.1944	19.2782	1.79541			14.0205			16.1195				15.6038					KLRC1	32.8072	33.1641	18.6888	33.246	32.7313	17.1371	2.93159	32.9111	33.1522	17.7709	1.88937
	32.6436			34.981									GAPDH	14.053	14.0335		16.1163	16.1072			15.458	15.4989					33.833			34.8102				33.3934
	38.4343			33.0197				32.7616						14.0272			16.0859				15.4349						35.8186			31.5854				29.718
KLRC3	38.7608	38.6482	23.2078	32.8163	33.2493	17.4062	55.7789	33.6457	33.312	17.3959	56.1781			37.8549			33.7453				32.6297					KLRC3	36.0041	36.0997	21.6244	31.6736	31.3079	15.7136	60.163	30.2802	30.0287	14.6474	125.981
	38.7496			33.9119				33.5288					KLRC3	38.1823	38.0186	23.985	33.5339	33.6425	17.5353	87.41	35.7958	34.164	18.6651	39.9453			36.4766			30.6646				30.0879
HEK				KL TG4 WT				KL TG4 Mut						36.3942			33.6484				34.0665					HEK				KL TG4 WT				KL TG4 Mut
	13.6543			14.5767				14.625					HEK 293T WT				10M TG4 WT				10M TG4 Mut						14.667			15.6654				15.6377
GAPDH	13.7657	13.657		14.4962	14.5235			14.5485	14.6116					14.0205			15.5728				15.4707					GAPDH	14.5737	14.6073		15.7739	15.8451			15.6786	15.802
	13.551			14.4976				14.6613					GAPDH	14.053	14.0335		15.6261	15.5885			15.4905	15.497					14.5813			16.0959				16.0898
	33.5664			28.4778				28.689						14.0272			15.5664				15.5298						26.1912			26.0095				25.7662
KLRK1	33.0466	33.5292	19.8722	28.7366	28.6525	14.129	53.5631	29.1127	28.8071	14.1955	51.1526			32.347			32.997				34.7919					ETV6	25.9664	26.0512	11.4439	26.0689	26.0751	10.23	2.31954	25.6864	25.7888	9.98672	2.74564
	33.9745			28.7433				28.6196					KLRC1	33.6133	33.1067	19.0732	32.5815	33.2508	17.6623	2.65891	33.0337	34.3391	18.8421	1.17372			25.9959			26.1468				25.9136
	25.1574			25.4315				25.2936						33.3598			34.1739				35.1916						30.4969			31.0244				29.0665
ETV6	25.2774	25.1765	11.5195	25.4629	25.4368	10.9133	1.52227	25.4168	25.3866	10.7749	1.67555		HEK				KL TG4 WT				KL TG4 Mut					PTPRO	31.4799	30.7899	16.1825	30.8001	31.1187	15.2736	1.87761	29.5393	29.2915	13.4895	6.46667
	25.0948			25.416				25.4492						16.6076			17.2137				16.5177						30.3928			31.5317				29.2689
	29.1139			27.6755				29.4449					GAPDH	16.0282	16.2178		17.1493	17.183			16.4715	16.4941				HEK				KL TG4 WT				KL TG4 Mut
NTF3	29.1279	29.2977	15.6407	27.6941	27.7899	13.2664	5.18473	29.3359	29.3726	14.761	1.84			16.0176			17.1859				16.4931						15.5795			16.0749				15.5608
	29.6513			28.0003				29.3371						34.0544			29.451				27.6072					GAPDH	15.4975	15.5948		16.0822	16.102			15.7012	15.5863
	29.415			31.1538				29.222					KLRK1	33.1371	34.0872	17.8694	29.194	29.2393	12.0563	56.2225	27.3554	27.479	10.9849	118.152			15.7073			16.149				15.4969
PTPRO	29.6047	29.4857	15.8287	31.4497	31.3324	16.8088	0.506921	28.7703	28.9139	14.3023	2.88069			35.0702			29.0728				27.4743						35.3992			27.528				27.4046
	29.4373			31.3936				28.7494						26.8067			25.9049				27.0507					KLRK1	33.1187	33.0658	17.471	27.3954	27.4534	11.3514	69.5344	27.0691	27.234	11.6477	56.6255
													ETV6	26.8636	26.7805	10.5627	25.7659	25.8022	8.61923	3.84626	27.1053	27.0826	10.5885	0.98229			33.0129			27.4369				27.2282
														26.6713			25.7358				27.0917						30.3401			27.5527				27.8844
														31.0016			32.7403				29.8056					NTF3	29.7737	29.9984	14.4036	27.6337	27.5576	11.4555	7.71728	27.6947	27.7909	12.2046	4.59172
													PTPRO	31.1028	31.1023	14.8845	32.4272	32.5838	15.4008	0.699147	29.7206	29.8768	13.3827	2.83198			29.8814			27.4864				27.7936
														31.2025			35.2403				30.1041
													HEK				KL TG4 WT				KL TG4 Mut
														16.7911			16.0451				15.8306
													GAPDH	16.491	16.6025		16.077	16.0293			16.0255	15.895
														16.5253			15.9658				15.8288
														30.4			27.0455				30.2576
													NTF3	31.9662	30.4291	13.8266	27.6653	27.7222	11.6929	4.3884	30.0097	30.1317	14.2367	0.752568
														30.4583			27.7792				30.1278
	KL TG4 WT			KL TG4 WT		KL TG4 Mut			KL TG4 Mut
KLRC2 (+0.00016 Mb)	405.726	226.703	414.617	349.015	86.5641	277.724	166.176	299.368	247.756	58.3586
KLRC3 (-0.015 Mb)	55.7789	87.41	60.163	67.7839	13.9926	56.1781	39.9453	125.981	74.0349	37.3247
KLRC1 (+0.019 Mb)	2.68529	2.65891	2.93159	2.7586	0.122795	1.79541	1.17372	1.88937	1.6195	0.317538
KLRK1 (-0.046Mb)	53.5631	56.2225	69.5344	59.7733	6.98698	51.1526	118.152	56.6255	75.3099	30.376
ETV6 (+1.2Mb)	1.52227	3.84626	2.31954	2.56269	0.964218	1.67555	0.98229	2.74564	1.80116	0.725341
NTF3 (-4.9Mb)	5.18473	4.3884	7.71728	5.76347	1.41929	1.84	0.752568	4.59172	2.39476	1.61567
PTPRO (+4.9Mb)	0.506921	0.699147	1.87761	1.02789	0.605942	2.88069	2.83198	6.46667	4.05978	1.70204
KLRC2 (+0.00016 Mb)	1.4609	1.36423	1.38497
KLRC3 (-0.015 Mb)	0.992894	2.18824	0.477555
KLRC1 (+0.019 Mb)	1.49565	2.26536	1.55162
KLRK1 (-0.046Mb)	1.04712	0.47585	1.22797
ETV6 (+1.2Mb)	0.908515	3.9156	0.844811
NTF3 (-4.9Mb)	2.81778	5.83123	1.68069
PTPRO (+4.9Mb)	0.175972	0.246876	0.290351
