# Supplementary figures and images for: Artificially inserted strong promoter containing multiple G-quadruplexes induces long-range chromatin modification
Source: eLife journal article supplement (doi:10.7554/elife.96216), 2024-04-03

Uncropped image of Figure 1B with relevant samples and bands labelled

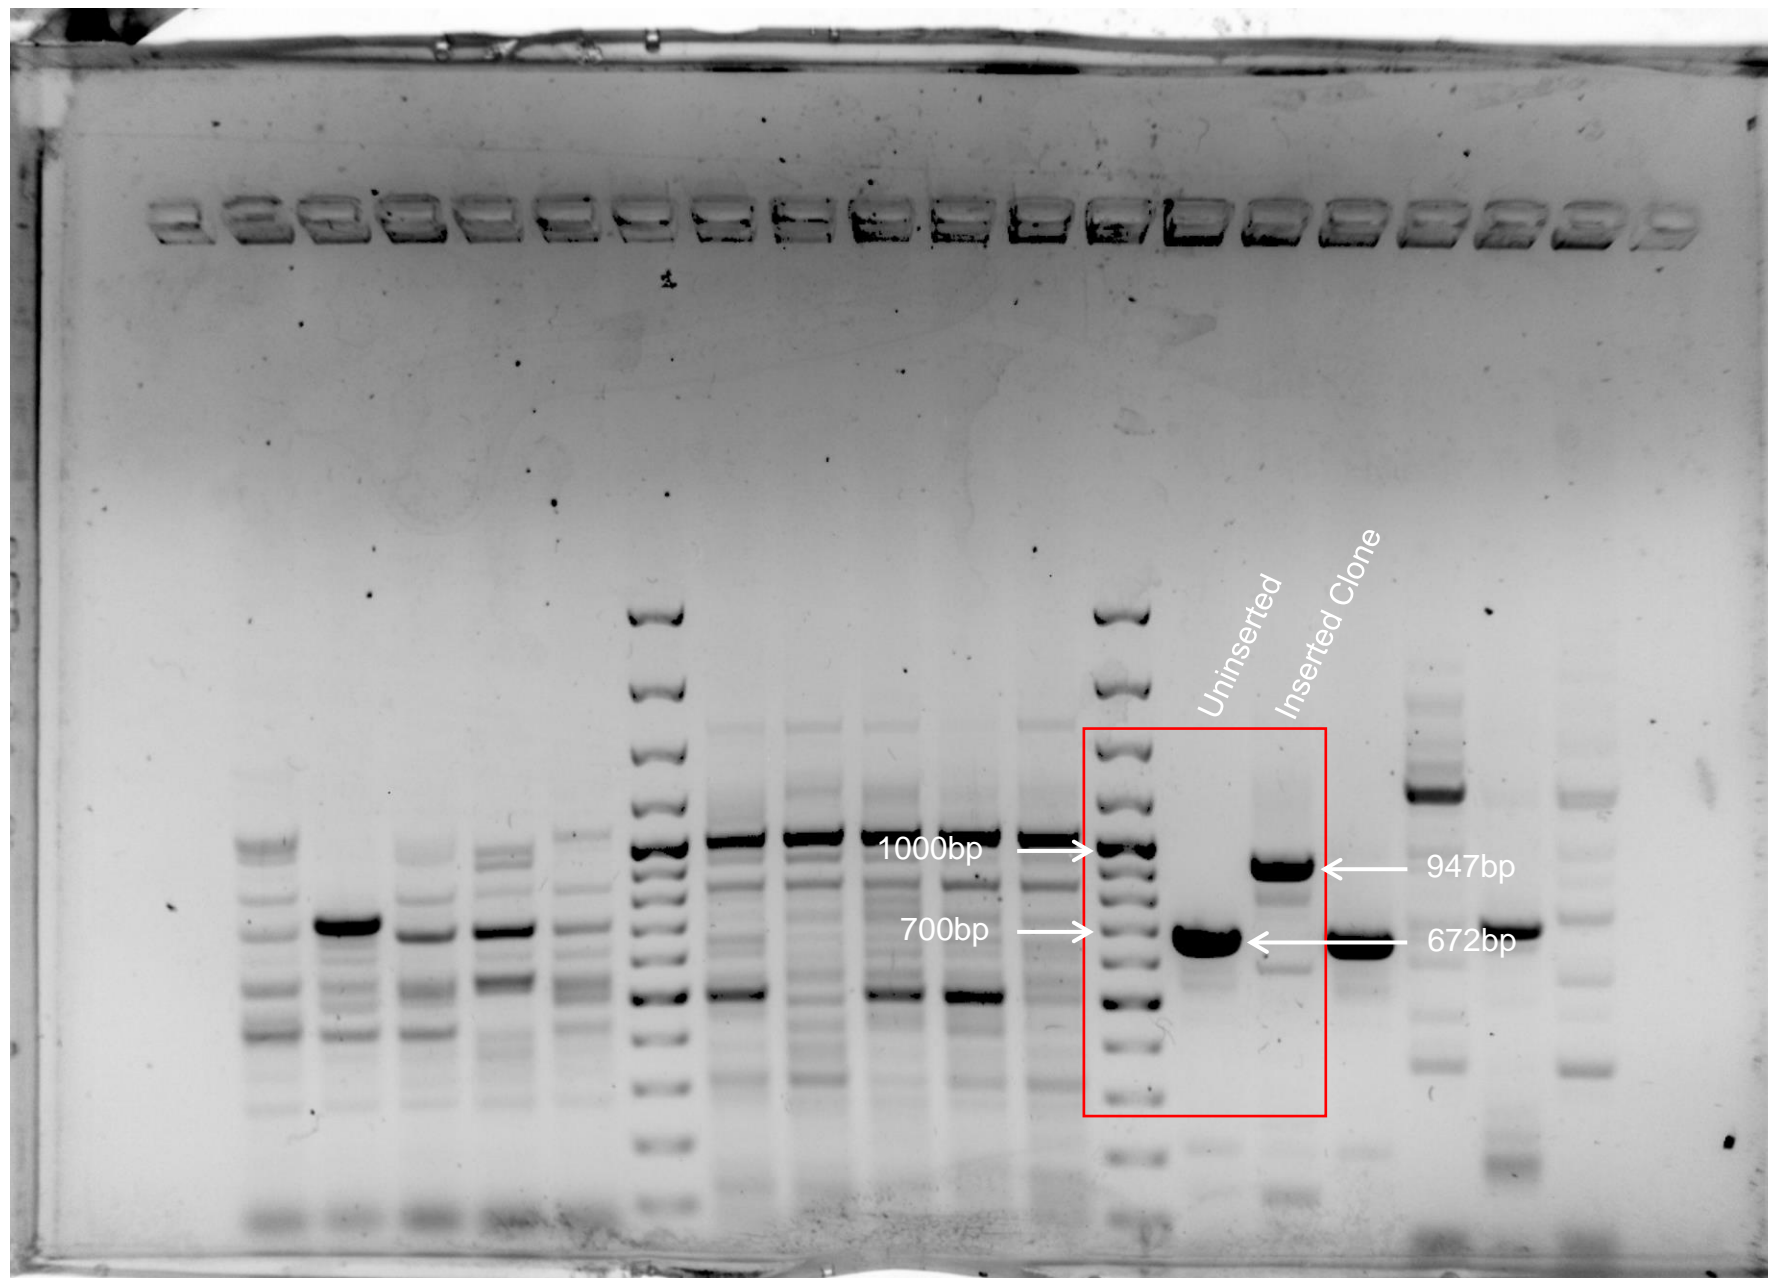

Supplement: fig1-data1 [file Uncropped image of Figure 1B with relevant samples and bands labelled.pdf › Figure1SourceData1/Uncropped image of Figure 1B with relevant samples and bands labelled.pdf]

Uncropped image of Figure 7B with relevant samples and bands labelled

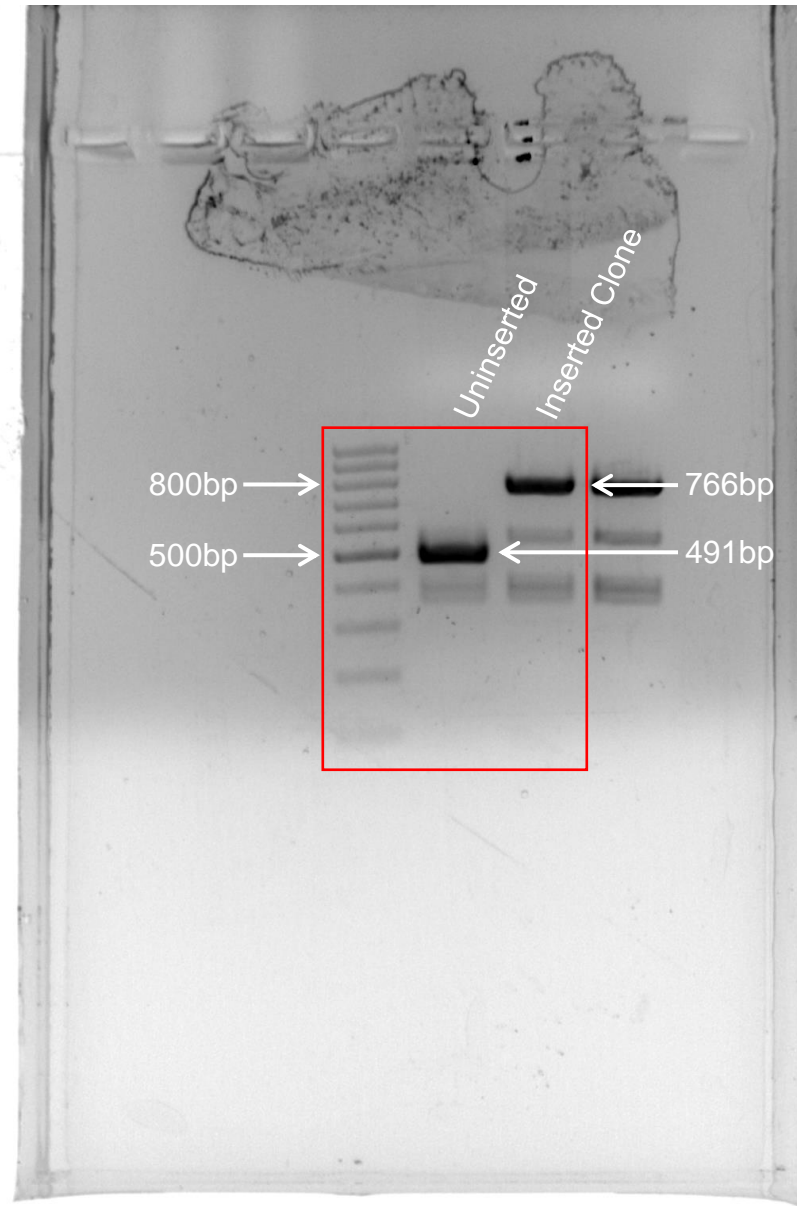

Supplement: fig7-data2 [file Uncropped image of Figure 7B with relevant samples and bands labelled.pdf › Figure7SourceData2/Uncropped image of Figure 7B with relevant samples and bands labelled.pdf]
